# Supplementary material for: Theoretical study of the regio- and stereoselectivity of the intramolecular Povarov reactions yielding 5H-chromeno[2,3-c] acridine derivatives
Source: Royal Society of Chemistry journal article supplement (doi:10.1039/c5ra25184b), 2016-01-01
Supplement: c5ra25184b1.pdf [file c5ra25184b1.pdf]

## Electronic Supplementary Information

### Theoretical Study of the Regio- and Stereoselectivity of the Intramolecular Povarov Reaction yielding 5*H*-chromeno[2,3-*c*] acridine derivatives

Meriem Awatif Mahi<sup>a</sup>, Sidi Mohamed Mekelleche<sup>a\*</sup>, Wafaa Benchouk<sup>a</sup>, M. José Aurell<sup>b</sup>,  
and Luis Ramón Domingo<sup>b\*</sup>

<sup>a</sup>Laboratory of Applied Thermodynamics and Molecular Modelling, Department of Chemistry,  
Faculty of Science, University of Tlemcen, BP 119, Tlemcen, 13000, Algeria

<sup>b</sup>Departamento de Química Orgánica, Universidad de Valencia, Dr. Moliner 50, 46100  
Burjassot, Valencia, Spain

| Pages   | Contents                                                                                                                                                                                                                                                                                                                                                                                          |
|---------|---------------------------------------------------------------------------------------------------------------------------------------------------------------------------------------------------------------------------------------------------------------------------------------------------------------------------------------------------------------------------------------------------|
| S2      | <b>Table S1.</b> B3LYP/6-31G(d,p) total (E, in a.u.) and relative ( $\Delta E$ , in kcal mol <sup>-1</sup> ) energies in gas phase of the stationary points involved in the <i>trans</i> and <i>cis</i> stereoisomeric channels of the IMADA reaction of ATCI <b>3</b> .                                                                                                                          |
| S2      | <b>Table S2.</b> MPW1B95/6-31G(d,p) total (E, in a.u.) and relative ( $\Delta E$ , in kcal mol <sup>-1</sup> ) energies in the presence of BF <sub>3</sub> catalyst of the stationary points involved in the <i>trans</i> and <i>cis</i> stereoisomeric channels of the IMADA reaction of ATCI <b>3-B</b> and of the 1,3-hydrogen shift for the favored <i>trans</i> channel.                     |
| S3      | <b>Scheme S1:</b> Structures of experimental <b>11B-18B</b> and non-experimental (reduced) <b>19B-21B</b> derivatives of ATCI <b>3-B</b> .                                                                                                                                                                                                                                                        |
| S4-S5   | <b>Table S3.</b> B3LYP/6-31G(d,p) total (E, in a.u.) and relative ( $\Delta E$ , in kcal mol <sup>-1</sup> ) energies of the stationary points involved in the <i>trans</i> and <i>cis</i> stereoisomeric pathways associated with the BF <sub>3</sub> catalysed IMADA reaction of the experimental <b>11B-18B</b> and non-experimental (reduced) <b>19B-21B</b> derivatives of ATCI <b>3-B</b> . |
| S6      | <b>Table S4.</b> B3LYP/6-31G(d,p) electronic chemical potential $\mu$ , chemical hardness $\eta$ , in a.u., global electrophilicity $\omega$ and global nucleophilicity $N$ indices, in eV units, of ATCI <b>3-B</b> derivatives <b>11B-21B</b> .                                                                                                                                                 |
| S7-S127 | Atomic coordinates (in Å) of equilibrium geometries of the calculated structures at the B3LYP/6-31G(d,p) and MPW1B95/6-31G(d,p) level.                                                                                                                                                                                                                                                            |

**Table S1.** B3LYP/6-31G(d,p) total (E, in a.u.) and relative ( $\Delta E$ , in kcal mol<sup>-1</sup>) energies in gas phase of the stationary points involved in the *trans* and *cis* stereoisomeric channels of the IMADA reaction of ATCI **3**.

| Non-catalysed reaction |              |            |
|------------------------|--------------|------------|
|                        | E            | $\Delta E$ |
| <b>3</b>               | -1021.486188 |            |
| <b>TS-tf</b>           | -1021.430982 | 34.6       |
| <b>TS-cf</b>           | -1021.430246 | 35.1       |
| <b>TS-b</b>            | -1021.382279 | 65.2       |
| <i>trans-4</i>         | -1021.478530 | 4.8        |
| <i>cis-4</i>           | -1021.476399 | 6.1        |
| <b>10</b>              | -1021.391336 | 59.5       |

**Table S2.** MPW1B95/6-31G(d,p) total (E, in a.u.) and relative ( $\Delta E$ , in kcal mol<sup>-1</sup>) energies in the presence of BF<sub>3</sub> catalyst of the stationary points involved in the *trans* and *cis* stereoisomeric channels of the IMADA reaction of ATCI **3-B** and of the 1,3-hydrogen shift for the favored *trans* channel.

|                  | IMADA reaction |              | 1,3-hydrogen shift |                                 |
|------------------|----------------|--------------|--------------------|---------------------------------|
|                  | E              | $\Delta E^a$ | E                  | $\Delta E$                      |
| <b>3-B</b>       | -1345.460306   |              | <i>trans-4+11</i>  | -1271.534301                    |
| <b>TS-tf-B</b>   | -1345.419862   | 25.4         | <b>TS-6</b>        | -1271.497047 23.4 <sup>b</sup>  |
| <b>TS-cf-B</b>   | -1345.418785   | 26.1         | <b>IN1</b>         | -1271.506761 17.3 <sup>b</sup>  |
| <b>TS-b-B</b>    | -1345.388107   | 45.3         | <i>trans-5+11</i>  | -1271.580025 -28.7 <sup>b</sup> |
| <i>trans-4-B</i> | -1345.468388   | -5.1         | <b>TS-5-tf</b>     | -1021.045397 74.7 <sup>c</sup>  |
| <i>cis-4-B</i>   | -1345.481828   | -13.5        | <i>trans-5</i>     | -1021.238425 -46.4 <sup>c</sup> |
| <b>10-B</b>      | -1345.406934   | 33.5         |                    |                                 |

<sup>a</sup> Relative to reactant **3-B**

<sup>b</sup> Relative to *trans-4+11* complex

<sup>c</sup> Relative to *trans-4*

*a) Experimental reactants*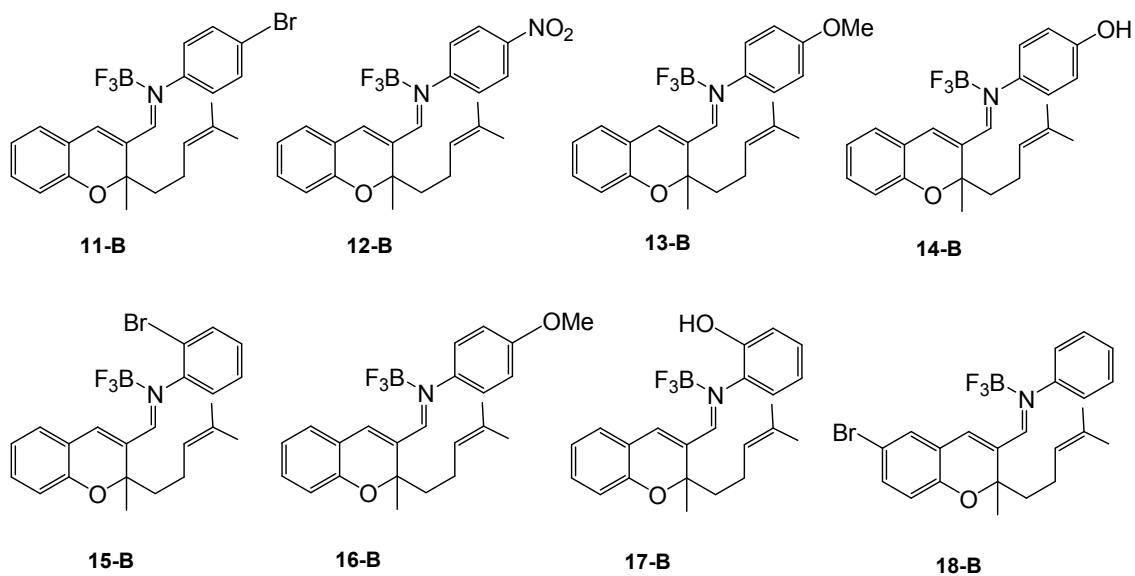*b) Non-experimental (reduced) reactants*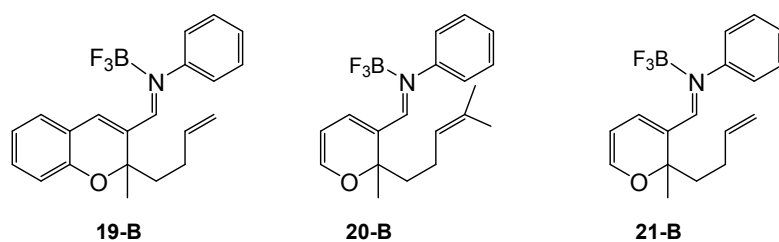

**Scheme S1:** Structures of experimental **11B-18B** and non-experimental (reduced) **19B-21B** derivatives of ATCI **3-B**.

**Table S3.** B3LYP/6-31G(d,p) total (E, in a.u.) and relative ( $\Delta E$ , in kcal mol<sup>-1</sup>) energies of the stationary points involved in the *trans* and *cis* stereoisomeric pathways associated with the BF<sub>3</sub> catalysed IMADA reaction of the experimental **11B-18B** and non-experimental (reduced) **19B-21B** derivatives of ATCI **3-B**.

|                                 | E            | $\Delta E^a$ |
|---------------------------------|--------------|--------------|
| <i>Experimental derivatives</i> |              |              |
| <b>11-B</b>                     | -3917.171684 |              |
| <b>TS-tf-B-11</b>               | -3917.123859 | <b>30.0</b>  |
| <b>TS-cf-B-11</b>               | -3917.114742 | <b>35.7</b>  |
| <i>trans</i> - <b>11-B</b>      | -3917.166969 | 3.0          |
| <i>cis</i> - <b>11-B</b>        | -3917.158362 | 8.4          |
| <b>12-B</b>                     | -1550.568076 |              |
| <b>TS-tf-B-12</b>               | -1550.521669 | <b>29.1</b>  |
| <b>TS-cf-B-12</b>               | -1550.510878 | <b>35.9</b>  |
| <i>trans</i> - <b>12-B</b>      | -1550.561402 | 4.2          |
| <i>cis</i> - <b>12-B</b>        | -1550.552497 | 9.8          |
| <b>13-B</b>                     | -1460.594675 |              |
| <b>TS-tf-B-13</b>               | -1460.547062 | <b>29.9</b>  |
| <b>TS-cf-B-13</b>               | -1460.539029 | <b>34.9</b>  |
| <i>trans</i> - <b>13-B</b>      | -1460.586942 | 4.9          |
| <i>cis</i> - <b>13-B</b>        | -1460.578494 | 10.2         |
| <b>14-B</b>                     | -1421.289533 |              |
| <b>TS-tf-B-14</b>               | -1421.241573 | <b>30.1</b>  |
| <b>TS-cf-B-14</b>               | -1421.233508 | <b>35.2</b>  |
| <i>trans</i> - <b>14-B</b>      | -1421.283596 | 3.7          |
| <i>cis</i> - <b>14-B</b>        | -1421.275109 | 9.1          |
| <b>15-B</b>                     | -3917.167284 |              |
| <b>TS-tf-B-15</b>               | -3917.118631 | <b>30.5</b>  |
| <b>TS-cf-B-15</b>               | -3917.109317 | <b>36.4</b>  |
| <i>trans</i> - <b>15-B</b>      | -3917.150760 | 10.4         |
| <i>cis</i> - <b>15-B</b>        | -3917.146640 | 13.0         |
| <b>16-B</b>                     | -1460.590149 |              |
| <b>TS-tf-B-16</b>               | -1460.539740 | <b>31.6</b>  |
| <b>TS-cf-B-16</b>               | -1460.529814 | <b>37.9</b>  |
| <i>trans</i> - <b>16-B</b>      | -1460.580656 | 6.0          |
| <i>cis</i> - <b>16-B</b>        | -1460.572111 | 11.3         |
| <b>17-B</b>                     | -1421.284620 |              |
| <b>TS-tf-B-17</b>               | -1421.235729 | <b>30.7</b>  |
| <b>TS-cf-B-17</b>               | -1421.228901 | <b>35.0</b>  |
| <i>trans</i> - <b>17-B</b>      | -1421.281259 | 2.1          |
| <i>cis</i> - <b>17-B</b>        | -1421.264563 | 12.6         |

Table S3 (continued)

|                                              |              |             |
|----------------------------------------------|--------------|-------------|
| <b>18-B</b>                                  | -3917.170524 |             |
| <b>TS-tf-B-18</b>                            | -3917.123514 | <b>29.5</b> |
| <b>TS-cf-B-18</b>                            | -3917.114683 | <b>35.0</b> |
| <i>trans</i> - <b>18-B</b>                   | -3917.168977 | 1.0         |
| <i>cis</i> - <b>18-B</b>                     | -3917.161627 | 5.6         |
| <i>Non-experimental<br/>(Reduced Models)</i> |              |             |
| <b>19-B</b>                                  | -1267.428057 |             |
| <b>TS-tf-B-19</b>                            | -1267.379887 | <b>30.2</b> |
| <b>TS-cf-B-19</b>                            | -1267.369909 | <b>36.4</b> |
| <i>trans</i> - <b>19-B</b>                   | -1267.436371 | -5.2        |
| <i>cis</i> - <b>19-B</b>                     | -1267.431164 | -1.9        |
| <b>20-B</b>                                  | -1192.408212 |             |
| <b>TS-tf-B-20</b>                            | -1192.356364 | <b>32.5</b> |
| <b>TS-cf-B-20</b>                            | -1192.347797 | <b>37.9</b> |
| <i>trans</i> - <b>20-B</b>                   | -1192.400372 | 4.9         |
| <i>cis</i> - <b>20-B</b>                     | -1192.392673 | 9.7         |
| <b>21-B</b>                                  | -1113.767045 |             |
| <b>TS-tf-B-21</b>                            | -1113.711778 | <b>34.6</b> |
| <b>TS-cf-B-21</b>                            | -1113.706212 | <b>38.1</b> |
| <i>trans</i> - <b>21-B</b>                   | -1113.770929 | -2.4        |
| <i>cis</i> - <b>21-B</b>                     | -1113.767741 | -0.4        |

<sup>a</sup> Relative to reactants **X-B** (X=11-21)

**Table S4.** B3LYP/6-31G(d,p) electronic chemical potential  $\mu$ , chemical hardness  $\eta$ , global electrophilicity  $\omega$ , and global nucleophilicity  $N$  indices, in eV units, of ATCI **3-B** and its derivatives **11B-21B**.

|                                     | $\mu$ | $\eta$ | $\omega$ | $N$  |
|-------------------------------------|-------|--------|----------|------|
| <i>Experimental derivatives</i>     |       |        |          |      |
| <b>3-B</b>                          | -4.24 | 3.52   | 2.54     | 3.11 |
| <b>11-B</b>                         | -4.34 | 3.38   | 2.78     | 3.09 |
| <b>12-B</b>                         | -4.60 | 3.22   | 3.27     | 3.30 |
| <b>13-B</b>                         | -4.10 | 3.36   | 2.49     | 3.07 |
| <b>14-B</b>                         | -4.13 | 3.38   | 2.51     | 3.28 |
| <b>15-B</b>                         | -4.35 | 3.39   | 2.79     | 3.24 |
| <b>16-B</b>                         | -4.14 | 3.38   | 2.54     | 2.91 |
| <b>17-B</b>                         | -4.18 | 3.40   | 2.57     | 3.35 |
| <b>18-B</b>                         | -4.36 | 3.34   | 2.84     | 3.09 |
| <i>Non-experimental derivatives</i> |       |        |          |      |
| <b>19-B</b>                         | -4.27 | 3.51   | 2.59     | 3.10 |
| <b>20-B</b>                         | -4.15 | 3.50   | 2.46     | 3.22 |
| <b>21-B</b>                         | -4.21 | 3.54   | 2.50     | 3.14 |

**Atomic coordinates (in Å) of equilibrium geometries of the calculated structures at the B3LYP/6-31G(d,p) and MPW1B95/6-31G(d,p) level.**

**3**

**E(RB3LYP) = -1021.486188 a.u.**

|   |             |             |             |
|---|-------------|-------------|-------------|
| 8 | 2.87101400  | 0.33635900  | 1.42408900  |
| 6 | 1.52235800  | 0.81598800  | 1.10466100  |
| 6 | 1.73147100  | 2.08556300  | 0.23607300  |
| 6 | 0.50504100  | 2.95146000  | -0.12224000 |
| 6 | 0.95789000  | 1.16132600  | 2.48561400  |
| 6 | -2.44401000 | 1.79112800  | -2.44884900 |
| 6 | -2.64387900 | 2.93033200  | -0.19045100 |
| 1 | 2.23466900  | 1.78011500  | -0.68923300 |
| 1 | 2.44725600  | 2.70610500  | 0.78832900  |
| 1 | 0.90816200  | 3.90983400  | -0.48322300 |
| 1 | -0.06116200 | 3.20007800  | 0.78084900  |
| 1 | -0.01416800 | 1.65388300  | 2.42020800  |
| 1 | 1.64890500  | 1.83856900  | 2.99456600  |
| 1 | 0.85234600  | 0.25748600  | 3.09119200  |
| 1 | -3.09010300 | 0.95760400  | -2.14524700 |
| 1 | -1.74316300 | 1.42101800  | -3.20194500 |
| 1 | -3.09533200 | 2.53580200  | -2.92565300 |
| 1 | -3.27298200 | 3.73165600  | -0.59957300 |
| 1 | -2.11184100 | 3.33831600  | 0.67142700  |
| 1 | -3.32879700 | 2.15148700  | 0.16884500  |
| 6 | 2.87122900  | -1.14099600 | -0.47770000 |
| 6 | 3.61983700  | -1.90308800 | -1.38955100 |
| 1 | 3.09279300  | -2.50160900 | -2.12795800 |
| 6 | 5.01055800  | -1.90029100 | -1.34734100 |
| 1 | 5.57961000  | -2.48859500 | -2.05997700 |
| 6 | 5.67064900  | -1.14355100 | -0.37218400 |
| 1 | 6.75593500  | -1.14265300 | -0.32982000 |
| 6 | 4.95032100  | -0.38158600 | 0.54770200  |
| 1 | 5.44707300  | 0.20736700  | 1.31139100  |
| 6 | 3.55672600  | -0.37119200 | 0.48592400  |
| 6 | 1.42941300  | -1.16347300 | -0.39643800 |
| 1 | 0.87329100  | -1.92095100 | -0.94157500 |
| 6 | 0.74666500  | -0.29379600 | 0.38757800  |
| 6 | -3.56014500 | -1.88198900 | -0.88869800 |
| 1 | -3.06474500 | -2.14012300 | -1.81917800 |
| 6 | -4.94177300 | -1.98723700 | -0.75414800 |
| 1 | -5.53856200 | -2.32997000 | -1.59466700 |
| 6 | -5.55938800 | -1.66875400 | 0.45848100  |
| 1 | -6.63538100 | -1.76546200 | 0.56707400  |
| 6 | -4.77905100 | -1.24714400 | 1.53669600  |
| 1 | -5.24732900 | -1.02284700 | 2.49113300  |
| 6 | -3.39664900 | -1.12398000 | 1.40453000  |
| 6 | -2.76935100 | -1.42361900 | 0.18012900  |
| 6 | -0.70732000 | -0.39830900 | 0.52654400  |
| 1 | -1.20512300 | 0.37766200  | 1.11776200  |
| 6 | -0.38740500 | 2.38456500  | -1.19620200 |
| 1 | 0.14947500  | 1.95671100  | -2.04402000 |
| 6 | -1.72853900 | 2.37997800  | -1.25679100 |
| 7 | -1.38332000 | -1.34278300 | -0.02457800 |
| 1 | -2.79359700 | -0.83088700 | 2.25861000  |

## 3-B

**E(RB3LYP) = -1346.069196 a.u.**

|   |             |             |             |
|---|-------------|-------------|-------------|
| 8 | -3.02143700 | 0.78909700  | -1.51404200 |
| 6 | -1.68919100 | 1.16858300  | -1.03638600 |
| 6 | -1.91928100 | 2.20605600  | 0.09785800  |
| 6 | -0.74822300 | 3.11990800  | 0.50708700  |
| 6 | -1.05624400 | 1.80961900  | -2.27165400 |
| 6 | 2.76034000  | 2.11875300  | 1.96480000  |
| 6 | 2.19094200  | 4.13394700  | 0.52253600  |
| 1 | -2.28884800 | 1.67217300  | 0.98051200  |
| 1 | -2.73976000 | 2.84401400  | -0.25141000 |
| 1 | -1.17150100 | 3.84039400  | 1.22354900  |
| 1 | -0.43630800 | 3.72479600  | -0.35129900 |
| 1 | -0.06770600 | 2.21888300  | -2.05470600 |
| 1 | -1.69472200 | 2.62803500  | -2.61367100 |
| 1 | -0.97279700 | 1.08189300  | -3.08357700 |
| 1 | 3.64388400  | 1.91574700  | 1.34629400  |
| 1 | 2.39597800  | 1.16491300  | 2.35162500  |
| 1 | 3.11135100  | 2.72256300  | 2.81300000  |
| 1 | 2.51974200  | 4.85797900  | 1.28010000  |
| 1 | 1.43312000  | 4.62458200  | -0.09192400 |
| 1 | 3.06693200  | 3.93603200  | -0.10885700 |
| 6 | -3.13285700 | -1.02283900 | 0.06704700  |
| 6 | -3.93250100 | -1.94423200 | 0.76863500  |
| 1 | -3.44661300 | -2.67496100 | 1.40896900  |
| 6 | -5.31532600 | -1.91617800 | 0.64763600  |
| 1 | -5.92722000 | -2.62087500 | 1.20079100  |
| 6 | -5.91554600 | -0.97969800 | -0.20599100 |
| 1 | -6.99633200 | -0.96116500 | -0.31146200 |
| 6 | -5.14653200 | -0.06515800 | -0.92208300 |
| 1 | -5.59888300 | 0.65999900  | -1.58980300 |
| 6 | -3.75846100 | -0.07432100 | -0.77129600 |
| 6 | -1.69468400 | -1.07210000 | 0.05588900  |
| 1 | -1.20798000 | -1.96158100 | 0.43989000  |
| 6 | -0.95907700 | -0.08370900 | -0.52530900 |
| 6 | 3.20908300  | -2.34964600 | -0.64681100 |
| 1 | 2.65187200  | -3.18307700 | -0.23524800 |
| 6 | 4.47063000  | -2.52920500 | -1.20808300 |
| 1 | 4.90596000  | -3.52348200 | -1.23374500 |
| 6 | 5.17429300  | -1.44254900 | -1.73318700 |
| 1 | 6.15991700  | -1.58823000 | -2.16443600 |
| 6 | 4.61110100  | -0.16716200 | -1.68942500 |
| 1 | 5.15930100  | 0.68609600  | -2.07735100 |
| 6 | 3.34636200  | 0.02387600  | -1.13201600 |
| 6 | 2.64281700  | -1.07098000 | -0.62138200 |
| 6 | 0.45600100  | -0.23749400 | -0.75963100 |
| 1 | 0.84162500  | 0.23569100  | -1.66124600 |
| 6 | 0.43182200  | 2.43230700  | 1.15310400  |
| 1 | 0.20248200  | 1.52082000  | 1.70106200  |
| 6 | 1.70448400  | 2.86639300  | 1.18391800  |
| 7 | 1.32324400  | -0.92035700 | -0.06554000 |
| 1 | 2.91960800  | 1.01932000  | -1.06034300 |
| 5 | 1.10462000  | -1.56972900 | 1.46177800  |
| 9 | 0.62439000  | -2.85702100 | 1.25463200  |
| 9 | 2.34814100  | -1.53768900 | 2.03892900  |
| 9 | 0.19890100  | -0.76164900 | 2.12132600  |



TS-tf

E(RB3LYP) = -1021.430982 a.u.

|   |             |             |             |
|---|-------------|-------------|-------------|
| 8 | 3.04817400  | 1.32038100  | -0.00333000 |
| 6 | 1.67470700  | 1.31505000  | 0.48987500  |
| 6 | 1.01736300  | 2.44683900  | -0.32726400 |
| 6 | -0.50683100 | 2.53946600  | -0.21594000 |
| 6 | 1.74528600  | 1.64500600  | 1.99185400  |
| 6 | -3.25866300 | 0.54987200  | -2.00172800 |
| 6 | -3.44948200 | 2.42295700  | -0.28520700 |
| 1 | 1.28920800  | 2.27835500  | -1.37529200 |
| 1 | 1.47658500  | 3.39692900  | -0.03207300 |
| 1 | -0.83741000 | 3.41657700  | -0.78836000 |
| 1 | -0.80360800 | 2.73901500  | 0.82172700  |
| 1 | 0.75017100  | 1.75579800  | 2.43243500  |
| 1 | 2.29591300  | 2.57909100  | 2.13879000  |
| 1 | 2.26431000  | 0.84500100  | 2.52693100  |
| 1 | -4.28499900 | 0.23259200  | -1.79309200 |
| 1 | -2.67094500 | -0.32486900 | -2.29008600 |
| 1 | -3.29243400 | 1.22645700  | -2.86937500 |
| 1 | -3.35833400 | 3.28896300  | -0.95853800 |
| 1 | -3.11849000 | 2.75446500  | 0.70277700  |
| 1 | -4.51114600 | 2.17018900  | -0.22657500 |
| 6 | 3.14141100  | -1.08878900 | -0.12856900 |
| 6 | 3.93710600  | -2.23413400 | -0.27048300 |
| 1 | 3.45100500  | -3.20575600 | -0.30564600 |
| 6 | 5.32388600  | -2.13656800 | -0.36826100 |
| 1 | 5.92728600  | -3.03213500 | -0.47791100 |
| 6 | 5.93042900  | -0.87808200 | -0.32811600 |
| 1 | 7.01037600  | -0.79161100 | -0.40566400 |
| 6 | 5.15967500  | 0.27687800  | -0.18409300 |
| 1 | 5.61269700  | 1.26230900  | -0.15355800 |
| 6 | 3.77314300  | 0.16844300  | -0.08243200 |
| 6 | 1.69326600  | -1.12200400 | -0.03417100 |
| 1 | 1.16796300  | -2.06245000 | -0.16772900 |
| 6 | 0.97798000  | -0.01805500 | 0.25017100  |
| 6 | -3.09791700 | -2.52906300 | -0.06125300 |
| 1 | -2.48096000 | -3.33431900 | -0.44758800 |
| 6 | -4.46379600 | -2.63037900 | -0.00230100 |
| 1 | -4.95654600 | -3.53844100 | -0.33846200 |
| 6 | -5.24837300 | -1.55370800 | 0.49729800  |
| 1 | -6.32840400 | -1.65508300 | 0.55147500  |
| 6 | -4.63325700 | -0.40985400 | 0.95303700  |
| 1 | -5.22672900 | 0.38693700  | 1.39341400  |
| 6 | -3.22384800 | -0.25595500 | 0.86538700  |
| 6 | -2.42298500 | -1.33839000 | 0.36540800  |
| 6 | -0.50515700 | -0.07068200 | 0.42960000  |
| 1 | -0.83505900 | 0.47003900  | 1.32818500  |
| 6 | -1.21085800 | 1.29122400  | -0.74550000 |
| 1 | -0.73172500 | 0.88623300  | -1.63689500 |
| 6 | -2.63921400 | 1.26941700  | -0.82888600 |
| 7 | -1.10216200 | -1.25211600 | 0.14832700  |
| 1 | -2.76219800 | 0.50054500  | 1.48890700  |

**TS-tf-B****E (RB3LYP) = -1346.020772 a.u.**

|   |             |             |             |
|---|-------------|-------------|-------------|
| 8 | -3.22039100 | 1.43641300  | 0.30027400  |
| 6 | -1.87554500 | 1.61649300  | -0.21480000 |
| 6 | -1.26824600 | 2.64644800  | 0.74644900  |
| 6 | 0.22268700  | 2.88025300  | 0.51451600  |
| 6 | -2.00178700 | 2.16040700  | -1.65155200 |
| 6 | 3.37130700  | 1.03298600  | 1.63020000  |
| 6 | 3.10142900  | 2.95532800  | -0.01589000 |
| 1 | -1.43285300 | 2.28198500  | 1.76627400  |
| 1 | -1.81941200 | 3.58769600  | 0.64773300  |
| 1 | 0.56694800  | 3.67487000  | 1.18729300  |
| 1 | 0.39253500  | 3.25240000  | -0.50255900 |
| 1 | -1.02455200 | 2.35293900  | -2.10480000 |
| 1 | -2.57280000 | 3.09416400  | -1.64973200 |
| 1 | -2.52276100 | 1.43322700  | -2.27988100 |
| 1 | 4.39200400  | 0.92282900  | 1.25462000  |
| 1 | 2.96726700  | 0.05725900  | 1.90746500  |
| 1 | 3.42625600  | 1.63480700  | 2.55365700  |
| 1 | 3.07420400  | 3.81164700  | 0.67758500  |
| 1 | 2.56404200  | 3.26640200  | -0.91444300 |
| 1 | 4.14865100  | 2.77536900  | -0.26679300 |
| 6 | -3.21702500 | -0.87465100 | -0.36947000 |
| 6 | -3.96183800 | -2.02356300 | -0.67323800 |
| 1 | -3.43243200 | -2.94273800 | -0.90908800 |
| 6 | -5.35440500 | -1.99497600 | -0.66109700 |
| 1 | -5.91930600 | -2.89105600 | -0.89757400 |
| 6 | -6.01962200 | -0.81015700 | -0.33109800 |
| 1 | -7.10524100 | -0.78301200 | -0.31379400 |
| 6 | -5.30044800 | 0.34634800  | -0.02601700 |
| 1 | -5.79831100 | 1.27409100  | 0.23570800  |
| 6 | -3.90768400 | 0.31044200  | -0.05456400 |
| 6 | -1.76529300 | -0.85338400 | -0.31097100 |
| 1 | -1.23672000 | -1.79953400 | -0.34562600 |
| 6 | -1.09172300 | 0.30636700  | -0.19130600 |
| 6 | 3.13106900  | -2.08796200 | -0.52779700 |
| 1 | 2.68288900  | -2.94619900 | -0.04712400 |
| 6 | 4.42497600  | -2.14199300 | -0.99349700 |
| 1 | 4.99384600  | -3.05878800 | -0.86956700 |
| 6 | 5.02161400  | -1.03274800 | -1.63389700 |
| 1 | 6.04437600  | -1.09457000 | -1.99234900 |
| 6 | 4.26818500  | 0.10482000  | -1.84766100 |
| 1 | 4.68344500  | 0.94147200  | -2.40255100 |
| 6 | 2.93987700  | 0.18547500  | -1.38513100 |
| 6 | 2.35306600  | -0.90130400 | -0.67427400 |
| 6 | 0.41207400  | 0.37691000  | -0.28235700 |
| 1 | 0.64139600  | 0.82053300  | -1.25456300 |
| 6 | 1.05295000  | 1.61164800  | 0.77333000  |
| 1 | 0.78749300  | 1.14647300  | 1.72620800  |
| 6 | 2.49323500  | 1.76712500  | 0.66761800  |
| 7 | 1.11608600  | -0.81724200 | -0.08122400 |
| 1 | 2.34189800  | 1.01002400  | -1.74500200 |
| 5 | 0.82519200  | -1.72455000 | 1.26188500  |
| 9 | 0.33066100  | -2.95014000 | 0.84501400  |
| 9 | 2.04072100  | -1.87226300 | 1.93476900  |
| 9 | -0.05931700 | -1.00560100 | 2.05031500  |

**TS-cf****E(RB3LYP) = -1021.430246 a.u.**

|   |             |             |             |
|---|-------------|-------------|-------------|
| 8 | -2.88817800 | 1.09651500  | -0.79913400 |
| 6 | -1.47396700 | 0.74696400  | -0.95416000 |
| 6 | -0.77450700 | 2.11576500  | -0.79403900 |
| 6 | 0.74348400  | 2.07074800  | -0.58935000 |
| 6 | -1.30782700 | 0.15331300  | -2.35949200 |
| 1 | -1.23735300 | 2.60500800  | 0.07109100  |
| 1 | -1.01851000 | 2.72973300  | -1.66811000 |
| 1 | 1.11019800  | 3.10406300  | -0.52948500 |
| 1 | 1.23527600  | 1.61535500  | -1.45423100 |
| 1 | -0.26458500 | -0.10864800 | -2.54298100 |
| 1 | -1.65929200 | 0.87187300  | -3.10686700 |
| 1 | -1.90233000 | -0.76086100 | -2.44721000 |
| 6 | -3.32610000 | -0.78312000 | 0.64894100  |
| 6 | -4.28033300 | -1.60327700 | 1.26457900  |
| 1 | -3.94136800 | -2.38727900 | 1.93744000  |
| 6 | -5.64170200 | -1.42384700 | 1.02482700  |
| 1 | -6.37012600 | -2.06742200 | 1.50785000  |
| 6 | -6.05994400 | -0.40780400 | 0.16136300  |
| 1 | -7.11855300 | -0.25867600 | -0.03073300 |
| 6 | -5.12728000 | 0.42016000  | -0.46508000 |
| 1 | -5.43376600 | 1.21550800  | -1.13636600 |
| 6 | -3.76614700 | 0.23056700  | -0.22383900 |
| 6 | -1.89315200 | -0.90399600 | 0.86555600  |
| 1 | -1.54721500 | -1.59637000 | 1.63108200  |
| 6 | -1.00410400 | -0.22011600 | 0.12464700  |
| 6 | 0.46832900  | -0.41051000 | 0.33744700  |
| 6 | 1.13430000  | 1.31608900  | 0.68228500  |
| 7 | 1.18417700  | -0.88503400 | -0.71967500 |
| 6 | 2.76538100  | 1.33295700  | 2.59838500  |
| 1 | 2.72566700  | 2.36827100  | 2.96858500  |
| 1 | 2.01445700  | 0.76518200  | 3.15751100  |
| 1 | 3.75689000  | 0.94284900  | 2.84644700  |
| 6 | 3.58402600  | 1.90689000  | 0.25157600  |
| 1 | 4.57468000  | 1.55390800  | 0.54990300  |
| 1 | 3.44848100  | 1.68395800  | -0.80772200 |
| 1 | 3.57840100  | 3.00297700  | 0.36165000  |
| 1 | 0.65251400  | -0.85171200 | 1.32717000  |
| 1 | 0.45151900  | 1.51532000  | 1.51270300  |
| 6 | 2.48624900  | -1.13896900 | -0.50065600 |
| 6 | 3.31415800  | -1.42949900 | -1.63405800 |
| 6 | 3.12497000  | -1.00823500 | 0.77644200  |
| 6 | 4.67351500  | -1.56221400 | -1.50392300 |
| 1 | 2.82150400  | -1.52120500 | -2.59704900 |
| 6 | 4.52577600  | -1.19126200 | 0.88552400  |
| 1 | 2.53312200  | -1.08923300 | 1.67881800  |
| 6 | 5.29491700  | -1.42913900 | -0.23262000 |
| 1 | 5.28465000  | -1.77195600 | -2.37737400 |
| 1 | 4.99201500  | -1.14709400 | 1.86660600  |
| 1 | 6.37054500  | -1.55056100 | -0.14402400 |
| 6 | 2.49985500  | 1.31189100  | 1.11166300  |

**TS-cf-B****E(RB3LYP) = -1346.011914 a.u.**

|   |             |             |             |
|---|-------------|-------------|-------------|
| 8 | -3.04219400 | -1.02796300 | 1.01139700  |
| 6 | -1.74669400 | -0.36419900 | 1.19768800  |
| 6 | -0.97596700 | -1.38638400 | 2.06096200  |
| 6 | 0.54394400  | -1.34127400 | 1.90306400  |
| 6 | -2.00919300 | 0.92474400  | 1.98857000  |
| 1 | -1.33319400 | -2.38459500 | 1.78332800  |
| 1 | -1.25313700 | -1.23337400 | 3.10866900  |
| 1 | 0.99178100  | -2.05180400 | 2.60761000  |
| 1 | 0.93944600  | -0.35007700 | 2.14933500  |
| 1 | -1.07927900 | 1.37125200  | 2.33841100  |
| 1 | -2.63451500 | 0.66465300  | 2.84899400  |
| 1 | -2.52409500 | 1.66658500  | 1.37750100  |
| 6 | -3.37591700 | 0.04573700  | -1.10443200 |
| 6 | -4.26912500 | 0.48822100  | -2.08959900 |
| 1 | -3.87341700 | 0.93392200  | -2.99862300 |
| 6 | -5.64456300 | 0.35957400  | -1.90993800 |
| 1 | -6.32899600 | 0.71120200  | -2.67537700 |
| 6 | -6.13794600 | -0.23160200 | -0.74227300 |
| 1 | -7.20937800 | -0.33797700 | -0.59942900 |
| 6 | -5.26682300 | -0.68052500 | 0.25104300  |
| 1 | -5.63175600 | -1.14165600 | 1.16270200  |
| 6 | -3.89228600 | -0.52912000 | 0.07199300  |
| 6 | -1.93070600 | 0.05688600  | -1.24265200 |
| 1 | -1.51811500 | 0.22992200  | -2.23457700 |
| 6 | -1.10975500 | -0.13772400 | -0.19217800 |
| 6 | 0.37172800  | -0.22910300 | -0.48823700 |
| 6 | 0.90662600  | -1.72609900 | 0.46469100  |
| 7 | 1.24340300  | 0.81713900  | -0.22710800 |
| 5 | 0.82110200  | 2.21982300  | 0.50960500  |
| 9 | 1.65200100  | 3.20345000  | 0.00933200  |
| 9 | -0.49379300 | 2.47213300  | 0.18508400  |
| 9 | 1.01642100  | 2.03534400  | 1.88612900  |
| 6 | 2.38352700  | -3.25898200 | -0.88199500 |
| 1 | 2.28103600  | -4.24035900 | -0.39427500 |
| 1 | 1.61317800  | -3.20761600 | -1.65695700 |
| 1 | 3.37094000  | -3.23448500 | -1.34917000 |
| 6 | 3.37246900  | -1.98446700 | 1.08919000  |
| 1 | 4.31235300  | -1.84887100 | 0.54434400  |
| 1 | 3.22966000  | -1.14372000 | 1.76692800  |
| 1 | 3.48892700  | -2.89513600 | 1.69843600  |
| 1 | 0.49242600  | -0.65031300 | -1.48587600 |
| 1 | 0.16081300  | -2.38839100 | 0.01580100  |
| 6 | 2.56227500  | 0.64129900  | -0.61671200 |
| 6 | 3.60323800  | 1.35399400  | 0.04738300  |
| 6 | 2.94453600  | -0.31050200 | -1.59379600 |
| 6 | 4.92572700  | 1.11869800  | -0.26505700 |
| 1 | 3.34567900  | 2.06569300  | 0.81725700  |
| 6 | 4.29457400  | -0.50876200 | -1.92499200 |
| 1 | 2.19599200  | -0.78976100 | -2.21127300 |
| 6 | 5.28887900  | 0.18314700  | -1.25532800 |
| 1 | 5.69916100  | 1.66174600  | 0.26996200  |
| 1 | 4.54843100  | -1.21311900 | -2.71199600 |
| 1 | 6.33459900  | 0.02350500  | -1.49967000 |
| 6 | 2.21779200  | -2.18538200 | 0.15820500  |

TS-b

**E(RB3LYP) = -1021.382279 a.u.**

|   |             |             |             |
|---|-------------|-------------|-------------|
| 6 | -4.92076900 | -1.57220000 | -0.97086600 |
| 6 | -5.21697100 | -1.15293800 | 0.33004200  |
| 6 | -4.26736900 | -0.46589800 | 1.08810900  |
| 6 | -3.01826900 | -0.19975900 | 0.53001300  |
| 6 | -2.69311200 | -0.62707200 | -0.76683000 |
| 6 | -3.66195500 | -1.31509100 | -1.51060800 |
| 8 | -2.07074400 | 0.41933700  | 1.28881100  |
| 6 | -1.04051100 | 1.23020600  | 0.62429000  |
| 6 | -0.47104300 | 0.44804100  | -0.59105000 |
| 6 | -1.33733700 | -0.37634100 | -1.22286000 |
| 6 | -0.12354000 | 1.47998700  | 1.84715100  |
| 6 | 1.26385200  | 2.12303700  | 1.67264600  |
| 6 | 2.21416400  | 1.45754100  | 0.71752800  |
| 6 | 0.89185100  | 0.54764800  | -1.34175600 |
| 6 | -1.75107100 | 2.52021000  | 0.16836900  |
| 6 | 2.14045700  | 1.66521700  | -0.69816800 |
| 6 | 1.72458400  | -1.10330200 | 0.80679100  |
| 6 | 2.01239500  | -1.36189700 | -0.57302900 |
| 7 | 1.56800500  | -0.62945400 | -1.60472700 |
| 6 | 2.41900700  | -1.79810500 | 1.82327800  |
| 6 | 3.37810800  | -2.73633000 | 1.50482500  |
| 6 | 3.64644300  | -3.03783600 | 0.14252400  |
| 6 | 2.98260800  | -2.38235600 | -0.86342700 |
| 6 | 3.45963300  | 1.34623300  | -1.41540500 |
| 6 | 1.65434700  | 3.05151900  | -1.16973900 |
| 1 | -5.66515000 | -2.10367600 | -1.55538000 |
| 1 | -6.19473900 | -1.35665800 | 0.75673300  |
| 1 | -4.47687600 | -0.13426400 | 2.09968700  |
| 1 | -3.41480600 | -1.65267700 | -2.51388600 |
| 1 | -1.00891400 | -0.90014300 | -2.11674800 |
| 1 | -0.00822100 | 0.52077500  | 2.35654400  |
| 1 | -0.70360100 | 2.10456600  | 2.53535200  |
| 1 | 1.71932200  | 2.14952200  | 2.66833700  |
| 1 | 1.13662700  | 3.17297200  | 1.37348100  |
| 1 | 3.12604900  | 1.04103200  | 1.12699400  |
| 1 | 0.68475800  | 1.05280200  | -2.29241900 |
| 1 | -1.05860500 | 3.26217500  | -0.23064800 |
| 1 | -2.27492100 | 2.96399000  | 1.02050900  |
| 1 | -2.48229900 | 2.29264800  | -0.61118000 |
| 1 | 2.16550600  | -1.60862000 | 2.86337200  |
| 1 | 3.90521500  | -3.27147200 | 2.28919000  |
| 1 | 4.39097400  | -3.79112000 | -0.10030500 |
| 1 | 3.19388300  | -2.57808500 | -1.90999100 |
| 1 | 3.31598100  | 1.24860900  | -2.49432400 |
| 1 | 3.90993700  | 0.42109000  | -1.05372700 |
| 1 | 4.16801700  | 2.16352500  | -1.23128300 |
| 1 | 1.62924200  | 3.08171200  | -2.26270800 |
| 1 | 2.35447900  | 3.82316200  | -0.83163000 |
| 1 | 0.66404300  | 3.31680700  | -0.80936400 |
| 1 | 0.80100300  | -0.61028900 | 1.05502400  |

**TS-b-B****E (RB3LYP) = -1345.984982 a.u.**

|   |             |             |             |
|---|-------------|-------------|-------------|
| 6 | -4.82871900 | -2.30624400 | 0.12390100  |
| 6 | -5.42847800 | -1.19830000 | 0.73155400  |
| 6 | -4.71658400 | -0.01013600 | 0.90549100  |
| 6 | -3.39840100 | 0.05767200  | 0.46020800  |
| 6 | -2.77139700 | -1.04597300 | -0.13726800 |
| 6 | -3.50407800 | -2.23038600 | -0.30083200 |
| 8 | -2.67868500 | 1.19617300  | 0.68540600  |
| 6 | -1.59827500 | 1.54661200  | -0.23948700 |
| 6 | -0.73190500 | 0.28923600  | -0.51638500 |
| 6 | -1.37115900 | -0.90318500 | -0.49133300 |
| 6 | -0.96748100 | 2.70367100  | 0.57420200  |
| 6 | 0.37281000  | 3.32389100  | 0.13342700  |
| 6 | 1.53555300  | 2.39191700  | -0.00726800 |
| 6 | 0.73516100  | 0.15993300  | -0.99935700 |
| 6 | -2.28264600 | 2.05628800  | -1.52292700 |
| 6 | 1.75125200  | 1.59231700  | -1.17619500 |
| 6 | 1.17945800  | 0.40515800  | 1.76006800  |
| 6 | 1.81266500  | -0.61761900 | 0.99486700  |
| 7 | 1.51605500  | -0.80026900 | -0.32997400 |
| 6 | 1.59778800  | 0.69495800  | 3.07172300  |
| 6 | 2.62904800  | -0.01787100 | 3.65054900  |
| 6 | 3.23442800  | -1.06473800 | 2.92075000  |
| 6 | 2.84518700  | -1.37090600 | 1.63497800  |
| 6 | 3.20983400  | 1.13555200  | -1.32483900 |
| 6 | 1.28684700  | 2.20005400  | -2.51871500 |
| 1 | -5.39020400 | -3.22550400 | -0.00854700 |
| 1 | -6.45905200 | -1.25644000 | 1.06916300  |
| 1 | -5.16327700 | 0.85837300  | 1.37788900  |
| 1 | -3.02085800 | -3.08954600 | -0.75794600 |
| 1 | -0.82142500 | -1.80986000 | -0.73208900 |
| 1 | -0.87774400 | 2.35981500  | 1.60684000  |
| 1 | -1.71390500 | 3.50414500  | 0.59596900  |
| 1 | 0.62046000  | 4.09394100  | 0.87102800  |
| 1 | 0.22822900  | 3.84301600  | -0.82293700 |
| 1 | 2.33891100  | 2.46962400  | 0.71627600  |
| 1 | 0.70520900  | -0.13699300 | -2.04464600 |
| 1 | -1.57621200 | 2.48280900  | -2.23635900 |
| 1 | -3.01099300 | 2.82916400  | -1.25901900 |
| 1 | -2.80733200 | 1.23781100  | -2.02157700 |
| 1 | 1.07229500  | 1.46090500  | 3.63533200  |
| 1 | 2.94893600  | 0.19576000  | 4.66564900  |
| 1 | 4.03293900  | -1.64177400 | 3.37823800  |
| 1 | 3.33759000  | -2.15615600 | 1.08229300  |
| 1 | 3.29665900  | 0.35040800  | -2.07688900 |
| 1 | 3.62337300  | 0.75886000  | -0.38791600 |
| 1 | 3.81390100  | 1.99403800  | -1.64018200 |
| 1 | 1.51095400  | 1.49705100  | -3.32459100 |
| 1 | 1.83703900  | 3.12571900  | -2.71621400 |
| 1 | 0.22345100  | 2.42270400  | -2.55495700 |
| 5 | 2.03945500  | -2.04310800 | -1.26554400 |
| 9 | 3.31973900  | -2.42157300 | -0.90342600 |
| 9 | 2.02566100  | -1.57159300 | -2.58075600 |
| 9 | 1.11017000  | -3.05672200 | -1.07742900 |
| 1 | 0.22529100  | 0.77775000  | 1.43129700  |

*trans-4***E (RB3LYP) = -1021.478530 a.u.**

|   |             |             |             |
|---|-------------|-------------|-------------|
| 8 | -3.01408700 | -1.29653500 | -0.34853100 |
| 6 | -1.68942100 | -1.36429000 | 0.25061900  |
| 6 | -0.94602500 | -2.37712400 | -0.63714200 |
| 6 | 0.54997300  | -2.46211300 | -0.32521900 |
| 6 | -1.86781300 | -1.86707100 | 1.69486100  |
| 6 | 3.48550200  | -1.15905300 | -1.62674700 |
| 6 | 3.27148600  | -2.32309000 | 0.58698200  |
| 1 | -1.09079900 | -2.06046600 | -1.67629600 |
| 1 | -1.42052000 | -3.35927800 | -0.53247800 |
| 1 | 1.01136300  | -3.18993400 | -1.00265300 |
| 1 | 0.69375100  | -2.85488000 | 0.68779500  |
| 1 | -0.90676600 | -1.98858100 | 2.20317500  |
| 1 | -2.38592800 | -2.83120300 | 1.69418000  |
| 1 | -2.46294500 | -1.15043000 | 2.26769100  |
| 1 | 4.57275500  | -1.24634000 | -1.53783700 |
| 1 | 3.26703400  | -0.25631300 | -2.20611700 |
| 1 | 3.12670900  | -2.01987700 | -2.20194200 |
| 1 | 3.06923300  | -3.26897000 | 0.07785900  |
| 1 | 2.78749700  | -2.35860300 | 1.56888600  |
| 1 | 4.35178800  | -2.27784000 | 0.75569300  |
| 6 | -3.14495300 | 1.08472200  | 0.00601400  |
| 6 | -3.95364200 | 2.22666400  | 0.07337600  |
| 1 | -3.48149200 | 3.19199500  | 0.23795000  |
| 6 | -5.33774000 | 2.13628900  | -0.07121700 |
| 1 | -5.95086800 | 3.03037400  | -0.01501800 |
| 6 | -5.92800900 | 0.89006900  | -0.29538800 |
| 1 | -7.00489700 | 0.81038900  | -0.41285900 |
| 6 | -5.14314800 | -0.26246000 | -0.36587000 |
| 1 | -5.58178900 | -1.23901200 | -0.54295600 |
| 6 | -3.76125800 | -0.16197000 | -0.21109500 |
| 6 | -1.69312600 | 1.11398200  | 0.11767000  |
| 1 | -1.17814100 | 2.06880900  | 0.11562200  |
| 6 | -0.97877600 | -0.01742400 | 0.22262600  |
| 6 | 2.99186300  | 2.65767400  | -0.18117300 |
| 1 | 2.32717200  | 3.47311400  | -0.44772600 |
| 6 | 4.33595200  | 2.79684100  | -0.16349900 |
| 1 | 4.78926600  | 3.75109800  | -0.41712100 |
| 6 | 5.20727700  | 1.68494300  | 0.18967900  |
| 1 | 6.28102900  | 1.85015900  | 0.19717900  |
| 6 | 4.70505600  | 0.47897600  | 0.50854000  |
| 1 | 5.37578200  | -0.33033900 | 0.78320900  |
| 6 | 3.22841000  | 0.19840000  | 0.53709200  |
| 6 | 2.36188000  | 1.38601700  | 0.14692000  |
| 6 | 0.53294600  | -0.01819800 | 0.40191100  |
| 1 | 0.74763300  | -0.27682300 | 1.45971100  |
| 6 | 1.24115600  | -1.09547000 | -0.47331900 |
| 1 | 1.07116300  | -0.76031100 | -1.50493200 |
| 6 | 2.79976300  | -1.11462200 | -0.24708600 |
| 7 | 1.07634900  | 1.29859100  | 0.11664000  |
| 1 | 2.96612500  | -0.01476100 | 1.58953000  |

*trans-4-B*

**E(RB3LYP) = -1346.065708 a.u.**

|   |             |             |             |
|---|-------------|-------------|-------------|
| 6 | 5.08898400  | -1.88812900 | -1.36189900 |
| 6 | 5.79796400  | -0.69739800 | -1.18470200 |
| 6 | 5.14741300  | 0.45459200  | -0.73909300 |
| 6 | 3.77986700  | 0.40996100  | -0.47332500 |
| 6 | 3.04506800  | -0.77571700 | -0.65607700 |
| 6 | 3.72002600  | -1.92012700 | -1.10010400 |
| 8 | 3.16183900  | 1.57074300  | -0.09947400 |
| 6 | 1.89773100  | 1.52267300  | 0.61804200  |
| 6 | 1.04872400  | 0.32865000  | 0.18934900  |
| 6 | 1.61346000  | -0.74074700 | -0.38837000 |
| 6 | 1.22696000  | 2.86392600  | 0.23505200  |
| 6 | -0.29169800 | 2.92554000  | 0.47209800  |
| 6 | -0.97230800 | 1.71498900  | -0.19043900 |
| 6 | -0.42178800 | 0.46870500  | 0.53815900  |
| 6 | 2.21797100  | 1.43965900  | 2.12139800  |
| 6 | -2.51751800 | 1.70433200  | -0.30007800 |
| 6 | -2.82316200 | 0.38855700  | -1.10221800 |
| 6 | -2.25036000 | -0.83514500 | -0.39857100 |
| 7 | -1.18272800 | -0.77481100 | 0.34902600  |
| 6 | -4.25284700 | 0.21791600  | -1.54693000 |
| 6 | -4.87360600 | -0.97254700 | -1.55651600 |
| 6 | -4.17603500 | -2.15908800 | -1.09924600 |
| 6 | -2.93586600 | -2.10759600 | -0.55997900 |
| 6 | -2.99035200 | 2.93235200  | -1.09938900 |
| 6 | -3.22441700 | 1.68024100  | 1.06930000  |
| 1 | 5.59900900  | -2.78354100 | -1.70287200 |
| 1 | 6.86439000  | -0.66291700 | -1.38774900 |
| 1 | 5.67999800  | 1.38884400  | -0.59496300 |
| 1 | 3.15616900  | -2.83931300 | -1.23578100 |
| 1 | 1.02674200  | -1.62490700 | -0.61614700 |
| 1 | 1.41897300  | 3.00947500  | -0.83352700 |
| 1 | 1.73360300  | 3.67970200  | 0.76172900  |
| 1 | -0.66385600 | 3.86578500  | 0.05441500  |
| 1 | -0.52107000 | 2.94711600  | 1.54498800  |
| 1 | -0.60257600 | 1.68011500  | -1.22585000 |
| 1 | -0.48026100 | 0.65572500  | 1.61755600  |
| 1 | 1.31521800  | 1.51929700  | 2.73370000  |
| 1 | 2.89636000  | 2.25358600  | 2.39455000  |
| 1 | 2.69352500  | 0.48382600  | 2.35415100  |
| 1 | -4.74648500 | 1.09422100  | -1.95204400 |
| 1 | -5.88721200 | -1.06824000 | -1.93289400 |
| 1 | -4.67280500 | -3.12089000 | -1.18975500 |
| 1 | -2.43573900 | -2.99987800 | -0.21203500 |
| 1 | -4.07816200 | 2.95509500  | -1.20473600 |
| 1 | -2.54876100 | 2.95825000  | -2.10231200 |
| 1 | -2.70856900 | 3.85564700  | -0.58726700 |
| 1 | -4.31049500 | 1.64002500  | 0.93620400  |
| 1 | -2.99578600 | 2.58652800  | 1.63855800  |
| 1 | -2.93735200 | 0.81819600  | 1.67778600  |
| 5 | -0.82810700 | -2.00834500 | 1.43505500  |
| 9 | -2.01781400 | -2.25224600 | 2.09187600  |
| 9 | 0.13875500  | -1.50371500 | 2.27125900  |
| 9 | -0.40304400 | -3.08933800 | 0.67805700  |
| 1 | -2.25628700 | 0.48181000  | -2.04787600 |



*cis-4***E (RB3LYP) = -1021.476399 a.u.**

|   |             |             |             |
|---|-------------|-------------|-------------|
| 8 | -2.88697600 | 1.16813000  | -0.71434100 |
| 6 | -1.49678100 | 0.76556400  | -0.90822800 |
| 6 | -0.73119500 | 2.10205000  | -0.89940500 |
| 6 | 0.78924800  | 1.94946000  | -0.76557900 |
| 6 | -1.40352400 | 0.04227100  | -2.26080500 |
| 1 | -1.11252600 | 2.68317300  | -0.05135500 |
| 1 | -0.98341000 | 2.66176700  | -1.80694000 |
| 1 | 1.23265500  | 2.94964600  | -0.75578100 |
| 1 | 1.19788200  | 1.43446700  | -1.64130800 |
| 1 | -0.38046800 | -0.28596400 | -2.45561100 |
| 1 | -1.74260800 | 0.70693700  | -3.06212900 |
| 1 | -2.03860200 | -0.84824200 | -2.25070000 |
| 6 | -3.32723900 | -0.74484500 | 0.68701600  |
| 6 | -4.28067400 | -1.58981200 | 1.26900500  |
| 1 | -3.94312200 | -2.38174800 | 1.93325600  |
| 6 | -5.64034000 | -1.42393700 | 1.00915800  |
| 1 | -6.36745800 | -2.08831800 | 1.46546000  |
| 6 | -6.05950700 | -0.39396700 | 0.16305300  |
| 1 | -7.11694500 | -0.25496100 | -0.04266300 |
| 6 | -5.12791300 | 0.45993400  | -0.42949000 |
| 1 | -5.43414500 | 1.26637900  | -1.08762500 |
| 6 | -3.76870900 | 0.28054100  | -0.17264100 |
| 6 | -1.89615600 | -0.83454600 | 0.94370900  |
| 1 | -1.55681700 | -1.49794600 | 1.73730800  |
| 6 | -1.01079500 | -0.12739700 | 0.22502200  |
| 6 | 0.48086200  | -0.21953300 | 0.46698500  |
| 6 | 1.15718800  | 1.18551900  | 0.52306300  |
| 7 | 1.13604300  | -1.03700300 | -0.55654000 |
| 6 | 2.91505400  | 1.53419800  | 2.31100900  |
| 1 | 2.66432100  | 2.59600700  | 2.40786000  |
| 1 | 2.28328900  | 0.97888500  | 3.01356700  |
| 1 | 3.95665200  | 1.41343500  | 2.62706900  |
| 6 | 3.58754800  | 1.89372200  | -0.07488200 |
| 1 | 4.63654900  | 1.80565000  | 0.22150500  |
| 1 | 3.51267200  | 1.56891600  | -1.11632800 |
| 1 | 3.32328900  | 2.95422600  | -0.03028200 |
| 1 | 0.61716300  | -0.70120300 | 1.45122400  |
| 1 | 0.68476000  | 1.72577700  | 1.35383400  |
| 6 | 2.41426900  | -1.14190600 | -0.40382300 |
| 6 | 3.18889600  | -1.91322500 | -1.36483700 |
| 6 | 3.11871800  | -0.47386600 | 0.76603900  |
| 6 | 4.52570700  | -2.05875100 | -1.22486900 |
| 1 | 2.63961600  | -2.35820900 | -2.18839600 |
| 6 | 4.60018900  | -0.71600200 | 0.81315400  |
| 1 | 2.69436900  | -0.93460300 | 1.67628500  |
| 6 | 5.24148900  | -1.45504100 | -0.10980200 |
| 1 | 5.09011600  | -2.63842900 | -1.95006200 |
| 1 | 5.15239000  | -0.28963100 | 1.64648500  |
| 1 | 6.31238400  | -1.62057900 | -0.03151300 |
| 6 | 2.69391600  | 1.05766200  | 0.86170600  |

*cis-4-B***E(RB3LYP) = -1346.057091 a.u.**

|   |             |             |             |
|---|-------------|-------------|-------------|
| 8 | -3.02092000 | -1.14868400 | 1.02739500  |
| 6 | -1.66612300 | -0.61111900 | 1.14989900  |
| 6 | -0.88654200 | -1.78595400 | 1.76857900  |
| 6 | 0.62832400  | -1.69103000 | 1.57152700  |
| 6 | -1.73435500 | 0.58309700  | 2.11186900  |
| 1 | -1.25098700 | -2.70389300 | 1.29315000  |
| 1 | -1.13535400 | -1.85725000 | 2.83249000  |
| 1 | 1.08917400  | -2.56418500 | 2.04024400  |
| 1 | 1.03455600  | -0.80920100 | 2.08121000  |
| 1 | -0.74260700 | 0.96588000  | 2.35913700  |
| 1 | -2.23326900 | 0.25857500  | 3.03065400  |
| 1 | -2.29465800 | 1.40629500  | 1.66691800  |
| 6 | -3.41196600 | 0.06902400  | -1.00804200 |
| 6 | -4.33857700 | 0.59945000  | -1.91525400 |
| 1 | -3.97262600 | 1.08952500  | -2.81394300 |
| 6 | -5.70766300 | 0.50483400  | -1.67364000 |
| 1 | -6.41607400 | 0.92488000  | -2.38059700 |
| 6 | -6.16215000 | -0.13890000 | -0.51885900 |
| 1 | -7.22798900 | -0.21958800 | -0.32587400 |
| 6 | -5.25761700 | -0.67528900 | 0.39848700  |
| 1 | -5.59204400 | -1.17872000 | 1.29945900  |
| 6 | -3.88890200 | -0.56189300 | 0.15660700  |
| 6 | -1.97363800 | 0.07640600  | -1.21531900 |
| 1 | -1.60222700 | 0.36267700  | -2.19729300 |
| 6 | -1.11460600 | -0.24099500 | -0.23280600 |
| 6 | 0.37441300  | -0.32377300 | -0.52480100 |
| 6 | 0.95606300  | -1.64555500 | 0.06662100  |
| 7 | 1.21851600  | 0.82482400  | -0.08318200 |
| 6 | 2.49536300  | -3.01252400 | -1.40197700 |
| 1 | 2.12254300  | -3.94630100 | -0.96877300 |
| 1 | 1.86745300  | -2.77535000 | -2.26819500 |
| 1 | 3.51111300  | -3.20467900 | -1.76176700 |
| 6 | 3.35974000  | -2.27914500 | 0.83386800  |
| 1 | 4.38576900  | -2.43607300 | 0.49050400  |
| 1 | 3.38274600  | -1.51091300 | 1.61147700  |
| 1 | 3.02279900  | -3.21331200 | 1.29100900  |
| 1 | 0.46702600  | -0.36850600 | -1.62076500 |
| 1 | 0.36579200  | -2.44266100 | -0.40140700 |
| 6 | 2.50996900  | 0.66289000  | -0.25261200 |
| 6 | 3.47608700  | 1.61187300  | 0.25981900  |
| 6 | 2.99675300  | -0.55115700 | -1.00928600 |
| 6 | 4.79387400  | 1.46496200  | -0.02646500 |
| 1 | 3.12701800  | 2.41737900  | 0.88810300  |
| 6 | 4.46583700  | -0.56968800 | -1.29654200 |
| 1 | 2.48961000  | -0.49854600 | -1.98841100 |
| 6 | 5.30003400  | 0.38447200  | -0.84741600 |
| 1 | 5.50270900  | 2.18086100  | 0.37998000  |
| 1 | 4.84108500  | -1.39410900 | -1.89488700 |
| 1 | 6.36054100  | 0.34987200  | -1.07660800 |
| 6 | 2.45234400  | -1.88778500 | -0.34828200 |
| 5 | 0.66744000  | 2.34848400  | 0.36761600  |
| 9 | -0.66874100 | 2.41751500  | 0.07989400  |
| 9 | 0.95486200  | 2.45188700  | 1.72295300  |
| 9 | 1.40259800  | 3.23586500  | -0.39358400 |

10

**E (RB3LYP) = -1021.391335 a.u.**

|   |             |             |             |
|---|-------------|-------------|-------------|
| 8 | -2.45686400 | 1.26276800  | -0.40466900 |
| 6 | -1.07651400 | 0.82568400  | -0.61606500 |
| 6 | -0.38341400 | 2.25024100  | -0.62405500 |
| 6 | 1.17155600  | 2.33674300  | -0.73672600 |
| 6 | -1.01818800 | 0.19183600  | -2.02488700 |
| 7 | 1.46685700  | -1.60712500 | 0.35021400  |
| 6 | 0.62875400  | 1.71592200  | 2.16636300  |
| 6 | 2.73835100  | 0.47776600  | 2.15537500  |
| 1 | -0.73450300 | 2.77642300  | 0.26231700  |
| 1 | -0.84572100 | 2.77131900  | -1.46827100 |
| 1 | 1.53904400  | 3.23755600  | -0.23261600 |
| 1 | 1.46450300  | 2.42488700  | -1.79036100 |
| 1 | -0.00481200 | -0.11555000 | -2.29781400 |
| 1 | -1.37229500 | 0.91303600  | -2.76799400 |
| 1 | -1.65201800 | -0.69701200 | -2.06952900 |
| 1 | 0.68629000  | 1.43665600  | 3.22340300  |
| 1 | -0.42955800 | 1.74743500  | 1.91333200  |
| 1 | 1.04016600  | 2.72707700  | 2.08063700  |
| 1 | 3.27679700  | 1.42520100  | 2.27211400  |
| 1 | 3.43441600  | -0.24475400 | 1.73252200  |
| 1 | 2.47846200  | 0.12601600  | 3.15941100  |
| 6 | -3.12389600 | -0.90636900 | 0.36332100  |
| 6 | -4.15656900 | -1.83273000 | 0.56600200  |
| 1 | -3.92554000 | -2.78328900 | 1.04023300  |
| 6 | -5.46137100 | -1.54015000 | 0.17489000  |
| 1 | -6.25282700 | -2.26601400 | 0.33289200  |
| 6 | -5.74829900 | -0.30336400 | -0.41201100 |
| 1 | -6.76501400 | -0.06786300 | -0.71279400 |
| 6 | -4.73610100 | 0.63343000  | -0.62379300 |
| 1 | -4.93825900 | 1.59853700  | -1.07640300 |
| 6 | -3.43051200 | 0.32168200  | -0.24612500 |
| 6 | -1.75677200 | -1.09070100 | 0.82003200  |
| 1 | -1.56893400 | -1.91942800 | 1.49912300  |
| 6 | -0.73516800 | -0.28380100 | 0.46767500  |
| 6 | 3.52345100  | -2.23614500 | -0.68960400 |
| 1 | 3.23589800  | -3.28293600 | -0.68255800 |
| 6 | 4.81125600  | -1.84748200 | -0.86501900 |
| 1 | 5.57370600  | -2.59692400 | -1.06176300 |
| 6 | 5.23915600  | -0.45932400 | -0.71239300 |
| 1 | 6.30457300  | -0.24699500 | -0.70368800 |
| 6 | 4.33665200  | 0.53167200  | -0.57215600 |
| 1 | 4.64226000  | 1.56889800  | -0.46121900 |
| 6 | 2.87644000  | 0.20483800  | -0.71789900 |
| 1 | 2.73137300  | 0.16510800  | -1.81739100 |
| 6 | 2.52468900  | -1.24282500 | -0.29125900 |
| 6 | 0.64727400  | -0.60246800 | 1.10621000  |
| 1 | 0.42798500  | -1.11163100 | 2.05352700  |
| 6 | 1.69587700  | 1.01871100  | -0.18314300 |
| 1 | 0.97259400  | 0.38847700  | -0.67718400 |
| 6 | 1.44473600  | 0.69908600  | 1.33458800  |

## 10-B

**E (RB3LYP) = -1345.986425 a.u.**

|   |             |             |             |
|---|-------------|-------------|-------------|
| 8 | 2.83275100  | -1.57908700 | -0.15850300 |
| 6 | 1.43129700  | -1.32381300 | -0.48004700 |
| 6 | 0.87501300  | -2.78509200 | -0.23144900 |
| 6 | -0.65926300 | -3.03451500 | -0.34720200 |
| 6 | 1.36682400  | -0.97830400 | -1.98570900 |
| 7 | -1.43974600 | 0.97225800  | 0.04917100  |
| 6 | -0.22978000 | -1.84178800 | 2.40122000  |
| 6 | -2.46310600 | -0.87205000 | 2.15991900  |
| 1 | 1.24258200  | -3.10395100 | 0.74239100  |
| 1 | 1.40742100  | -3.40699400 | -0.95725400 |
| 1 | -0.96492000 | -3.85763600 | 0.30775300  |
| 1 | -0.91525700 | -3.33449100 | -1.37098200 |
| 1 | 0.34022400  | -0.82480100 | -2.33211200 |
| 1 | 1.80856900  | -1.79040100 | -2.57143000 |
| 1 | 1.91769300  | -0.05763500 | -2.19013800 |
| 1 | -0.34953700 | -1.39055100 | 3.39091700  |
| 1 | 0.83126200  | -1.79410100 | 2.16467100  |
| 1 | -0.52540900 | -2.89182600 | 2.48965400  |
| 1 | -2.88453600 | -1.83928500 | 2.45417600  |
| 1 | -3.23533200 | -0.33102300 | 1.61346800  |
| 1 | -2.27038800 | -0.30565300 | 3.07615300  |
| 5 | -1.39541700 | 2.63075100  | 0.13156800  |
| 9 | -1.36082300 | 3.08199400  | -1.17336200 |
| 9 | -0.26107900 | 2.96187200  | 0.85152200  |
| 9 | -2.55044600 | 3.00461100  | 0.79428300  |
| 6 | 3.27310900  | 0.75277000  | 0.15291600  |
| 6 | 4.20683500  | 1.79931800  | 0.17208900  |
| 1 | 3.87076800  | 2.79891200  | 0.43439400  |
| 6 | 5.54439600  | 1.56098900  | -0.13402800 |
| 1 | 6.25942300  | 2.37741100  | -0.12161300 |
| 6 | 5.96444200  | 0.26347000  | -0.44672200 |
| 1 | 7.00798400  | 0.07245800  | -0.67943900 |
| 6 | 5.05284800  | -0.79246500 | -0.47145300 |
| 1 | 5.35919100  | -1.80516500 | -0.71157800 |
| 6 | 3.71290500  | -0.53684800 | -0.18409000 |
| 6 | 1.88367600  | 0.89859600  | 0.54964100  |
| 1 | 1.59463700  | 1.83028100  | 1.02301400  |
| 6 | 0.95082300  | -0.05903700 | 0.36126600  |
| 6 | -3.58253300 | 1.13237100  | -1.07903400 |
| 1 | -3.47407000 | 2.18848100  | -1.27978500 |
| 6 | -4.78568700 | 0.50911300  | -1.18387300 |
| 1 | -5.64318800 | 1.08967700  | -1.51323200 |
| 6 | -5.00256800 | -0.88261700 | -0.82206100 |
| 1 | -6.01812700 | -1.26530600 | -0.79964400 |
| 6 | -3.95108800 | -1.67500000 | -0.53991400 |
| 1 | -4.06801800 | -2.73191000 | -0.31821300 |
| 6 | -2.56058900 | -1.13012300 | -0.70427100 |
| 1 | -2.38995600 | -1.23784300 | -1.79698300 |
| 6 | -2.45886200 | 0.38714400  | -0.52789200 |
| 6 | -0.46242900 | 0.22312900  | 0.95618500  |
| 1 | -0.32119900 | 0.92368700  | 1.77968500  |
| 6 | -1.30641500 | -1.69228800 | -0.04254700 |
| 1 | -0.63807000 | -1.09166500 | -0.64031300 |
| 6 | -1.13273500 | -1.08693000 | 1.39712900  |

*trans-4+11* complex

**E(RB3LYP) = -1272.152041 a.u.**

|   |             |             |             |
|---|-------------|-------------|-------------|
| 6 | -1.48118200 | 4.41897900  | -1.58702500 |
| 6 | -0.53733300 | 3.49708400  | -0.85253700 |
| 6 | -0.97211100 | 2.60043700  | 0.04811300  |
| 7 | -2.32275300 | 2.41943900  | 0.37650200  |
| 6 | -3.21395100 | 3.52594900  | 0.02887900  |
| 6 | -2.94167700 | 3.96165000  | -1.41527500 |
| 6 | -2.77831100 | -1.07397000 | 0.23240900  |
| 6 | -4.20980700 | -1.40423700 | 0.57776400  |
| 6 | -4.72226100 | -1.17254700 | 1.79837600  |
| 6 | -3.87647500 | -0.68034900 | 2.87858800  |
| 6 | -2.53920900 | -0.55948100 | 2.72411800  |
| 6 | -1.88068900 | -0.93059600 | 1.46667800  |
| 7 | -0.60226800 | -1.05999900 | 1.49012400  |
| 6 | -2.12189800 | -1.95724800 | -0.87056000 |
| 1 | -1.88714200 | -0.28040400 | 3.54612500  |
| 1 | -4.33572200 | -0.45478600 | 3.83754100  |
| 1 | -5.77379900 | -1.35472400 | 2.00095800  |
| 1 | -4.85306700 | -1.76249200 | -0.22047300 |
| 1 | -2.82153000 | -0.04207500 | -0.16990200 |
| 1 | -4.25024900 | 3.19171400  | 0.14526300  |
| 1 | -3.06401400 | 4.38898900  | 0.69984900  |
| 1 | -3.63700900 | 4.75953900  | -1.69747400 |
| 1 | -3.13951000 | 3.10882100  | -2.07503400 |
| 1 | -1.36448400 | 5.45349100  | -1.22973600 |
| 1 | -1.23089500 | 4.44952300  | -2.65596100 |
| 1 | 0.52420600  | 3.54503900  | -1.07315300 |
| 1 | -0.29069500 | 1.91808900  | 0.54844200  |
| 1 | -2.46840400 | 2.05123400  | 1.30848900  |
| 6 | -2.16031600 | -3.43821800 | -0.44263400 |
| 1 | -3.19581500 | -3.78563800 | -0.36829000 |
| 1 | -1.65258300 | -4.08260600 | -1.16693000 |
| 1 | -1.69506900 | -3.59588700 | 0.53490200  |
| 6 | -2.87463900 | -1.78700500 | -2.20428500 |
| 1 | -2.41499100 | -2.39024400 | -2.99248600 |
| 1 | -3.91836000 | -2.10680600 | -2.12911300 |
| 1 | -2.86639300 | -0.74146300 | -2.53271700 |
| 6 | 1.67328700  | -2.08072800 | -1.94089100 |
| 1 | 2.21319000  | -2.14123400 | -2.89134500 |
| 1 | 1.94847000  | -2.97345300 | -1.36877900 |
| 6 | 0.14764500  | -2.04875900 | -2.18879200 |
| 1 | -0.18250000 | -3.07678600 | -2.37197300 |
| 1 | -0.06300200 | -1.49760500 | -3.11085200 |
| 6 | -0.66838500 | -1.41438100 | -1.02859700 |
| 1 | -0.77943700 | -0.34403300 | -1.24731300 |
| 6 | 0.11129700  | -1.50571400 | 0.30054000  |
| 1 | 0.33734500  | -2.57308000 | 0.47765500  |
| 6 | 5.58029000  | -0.07083200 | -0.15204300 |
| 6 | 4.19076400  | 0.90621700  | 2.06694600  |
| 6 | 5.55159500  | 1.17370800  | 1.92853200  |
| 6 | 6.24475700  | 0.67635800  | 0.82141600  |
| 1 | 6.10042600  | -0.46532400 | -1.01878800 |
| 1 | 3.64729100  | 1.26873900  | 2.93594700  |
| 1 | 6.07129000  | 1.75714800  | 2.68223500  |

|   |            |             |             |
|---|------------|-------------|-------------|
| 1 | 7.30672100 | 0.87517500  | 0.70956100  |
| 8 | 3.59572300 | -1.08373900 | -0.96520700 |
| 6 | 2.10809300 | -0.25900900 | 1.23971000  |
| 1 | 1.62144600 | -0.19178100 | 2.20763200  |
| 6 | 1.46554700 | -0.81677900 | 0.20054400  |
| 6 | 3.49907000 | 0.15931200  | 1.10334200  |
| 6 | 4.21427700 | -0.31600900 | -0.01700600 |
| 6 | 2.16895200 | -0.86497700 | -1.15175500 |
| 6 | 2.00624600 | 0.44696000  | -1.94026500 |
| 1 | 2.43980400 | 1.27845500  | -1.37853700 |
| 1 | 2.52584700 | 0.36721500  | -2.90097500 |
| 1 | 0.95655600 | 0.68618900  | -2.12522800 |

TS-6

E(RB3LYP) = -1272.134988 a.u.

|   |             |             |             |
|---|-------------|-------------|-------------|
| 6 | -2.19583000 | 3.51863400  | -1.99435400 |
| 6 | -1.13429600 | 3.10426800  | -1.00928800 |
| 6 | -1.36391900 | 2.29966100  | 0.03007000  |
| 7 | -2.67069100 | 1.73542300  | 0.30240700  |
| 6 | -3.80599400 | 2.37647100  | -0.42021100 |
| 6 | -3.43575200 | 2.61937000  | -1.88126100 |
| 6 | -2.62307700 | -1.02314500 | 0.52419500  |
| 6 | -4.03274200 | -1.05648500 | 0.78742600  |
| 6 | -4.58754300 | -0.55525200 | 1.94371000  |
| 6 | -3.71060300 | -0.11021800 | 2.98012600  |
| 6 | -2.34871100 | -0.17701900 | 2.84477600  |
| 6 | -1.70967000 | -0.71006600 | 1.64687400  |
| 7 | -0.40164900 | -0.76150800 | 1.62510900  |
| 6 | -2.01209500 | -1.84988000 | -0.62235600 |
| 1 | -1.68548300 | 0.10641900  | 3.65713700  |
| 1 | -4.13514700 | 0.26657400  | 3.90869800  |
| 1 | -5.66297200 | -0.53424700 | 2.08579800  |
| 1 | -4.69469100 | -1.43045000 | 0.00940300  |
| 1 | -2.66310600 | 0.50765600  | 0.18197200  |
| 1 | -4.66240200 | 1.70676500  | -0.31748900 |
| 1 | -4.04276600 | 3.32240800  | 0.08017300  |
| 1 | -4.29258500 | 3.06453500  | -2.39628800 |
| 1 | -3.23799000 | 1.65559000  | -2.36382100 |
| 1 | -2.46700500 | 4.57091700  | -1.82573300 |
| 1 | -1.79270700 | 3.47643700  | -3.01288900 |
| 1 | -0.12115300 | 3.46773800  | -1.15232400 |
| 1 | -0.59729700 | 1.94606400  | 0.71058000  |
| 1 | -2.84330100 | 1.74312800  | 1.31403600  |
| 6 | -2.00469300 | -3.33826100 | -0.19402600 |
| 1 | -3.03227100 | -3.68658800 | -0.04643800 |
| 1 | -1.54195600 | -3.98729800 | -0.94575900 |
| 1 | -1.47454400 | -3.47870300 | 0.75163600  |
| 6 | -2.81939600 | -1.71767800 | -1.92885500 |
| 1 | -2.36841100 | -2.31230800 | -2.72891400 |
| 1 | -3.84784100 | -2.07296400 | -1.81391900 |
| 1 | -2.85966600 | -0.67659200 | -2.27220600 |
| 6 | 1.74089600  | -2.02254400 | -1.82132700 |
| 1 | 2.24772100  | -2.14415900 | -2.78460000 |
| 1 | 2.02485400  | -2.88327800 | -1.20667400 |
| 6 | 0.20857300  | -1.98331100 | -2.01924500 |
| 1 | -0.13474800 | -3.01363300 | -2.15602000 |
| 1 | -0.02395500 | -1.46654300 | -2.95687500 |
| 6 | -0.56848100 | -1.29968300 | -0.85784900 |
| 1 | -0.70189300 | -0.24333300 | -1.13001600 |
| 6 | 0.25627600  | -1.30949100 | 0.45206800  |
| 1 | 0.49921800  | -2.36996600 | 0.66231100  |
| 6 | 5.71064900  | 0.08811400  | -0.29430600 |
| 6 | 4.39595400  | 1.20147700  | 1.90431300  |
| 6 | 5.75154500  | 1.45881300  | 1.70412800  |
| 6 | 6.40793400  | 0.89347500  | 0.60756700  |
| 1 | 6.20149800  | -0.36092800 | -1.15172600 |
| 1 | 3.88234300  | 1.61538000  | 2.76864500  |
| 1 | 6.29588900  | 2.08618500  | 2.40345900  |

|   |            |             |             |
|---|------------|-------------|-------------|
| 1 | 7.46559200 | 1.08301900  | 0.44795500  |
| 8 | 3.70192900 | -0.96979100 | -0.97819400 |
| 6 | 2.28529900 | -0.00902200 | 1.22271300  |
| 1 | 1.82126100 | 0.12075800  | 2.19545800  |
| 6 | 1.60926700 | -0.63732900 | 0.24673600  |
| 6 | 3.67108700 | 0.39694500  | 1.01403000  |
| 6 | 4.35021800 | -0.14726300 | -0.09830100 |
| 6 | 2.26704300 | -0.76790400 | -1.12036600 |
| 6 | 2.07218200 | 0.49552600  | -1.98056600 |
| 1 | 2.50544200 | 1.36397200  | -1.47711700 |
| 1 | 2.57233100 | 0.36685600  | -2.94640700 |
| 1 | 1.01393900 | 0.70228800  | -2.15762700 |



IN1

**E(RB3LYP) = -1272.135132 a.u.**

|   |             |             |             |
|---|-------------|-------------|-------------|
| 6 | -2.31746700 | 3.98467100  | -1.66121800 |
| 6 | -1.25019000 | 3.28557100  | -0.86042200 |
| 6 | -1.46626400 | 2.24116900  | -0.06578500 |
| 7 | -2.82286100 | 1.69900200  | 0.12079800  |
| 6 | -3.93964900 | 2.58155300  | -0.34089400 |
| 6 | -3.61520100 | 3.16396200  | -1.71304300 |
| 6 | -2.56392100 | -1.40145300 | 0.52439200  |
| 6 | -3.95859400 | -1.32966800 | 0.58491600  |
| 6 | -4.66131600 | -0.59737900 | 1.55832400  |
| 6 | -3.91390500 | 0.05352900  | 2.55383000  |
| 6 | -2.52407100 | 0.04810800  | 2.52246900  |
| 6 | -1.76540700 | -0.66773100 | 1.50877400  |
| 7 | -0.44818000 | -0.52762200 | 1.50895700  |
| 6 | -1.83683100 | -2.31227700 | -0.47674900 |
| 1 | -1.94397000 | 0.53543600  | 3.30131900  |
| 1 | -4.42364400 | 0.58358500  | 3.35681600  |
| 1 | -5.74597400 | -0.59845000 | 1.57576900  |
| 1 | -4.54134800 | -1.87748900 | -0.15184200 |
| 1 | -2.88665500 | 0.74925800  | -0.29863800 |
| 1 | -4.84256500 | 1.96878900  | -0.33149800 |
| 1 | -4.04654300 | 3.37171400  | 0.40799200  |
| 1 | -4.45504600 | 3.77952400  | -2.04850400 |
| 1 | -3.51164000 | 2.34609000  | -2.43629600 |
| 1 | -2.50625000 | 4.97598900  | -1.22535900 |
| 1 | -1.94876500 | 4.17295300  | -2.67597800 |
| 1 | -0.22965900 | 3.65021700  | -0.93499600 |
| 1 | -0.72256300 | 1.67871300  | 0.49615800  |
| 1 | -2.92995200 | 1.43335300  | 1.13792700  |
| 6 | -1.71805200 | -3.72841200 | 0.14202000  |
| 1 | -2.71608300 | -4.12160700 | 0.36029700  |
| 1 | -1.22126800 | -4.42893800 | -0.53858700 |
| 1 | -1.16286800 | -3.71316700 | 1.08373100  |
| 6 | -2.61050900 | -2.43339600 | -1.80675300 |
| 1 | -2.06262400 | -3.04908400 | -2.52569400 |
| 1 | -3.58633200 | -2.90786400 | -1.66972500 |
| 1 | -2.77625600 | -1.45068900 | -2.26480000 |
| 6 | 1.76735000  | -1.76778900 | -2.06920300 |
| 1 | 1.57391600  | -1.35385800 | -3.06531400 |
| 1 | 2.61731900  | -2.44703700 | -2.17675200 |
| 6 | 0.52994000  | -2.55362100 | -1.58650600 |
| 1 | 0.85901000  | -3.38860900 | -0.95620500 |
| 1 | 0.04013800  | -3.00309500 | -2.45651400 |
| 6 | -0.43434100 | -1.68534500 | -0.76250200 |
| 1 | -0.63082300 | -0.75585200 | -1.32120800 |
| 6 | 0.29641800  | -1.32309200 | 0.55002300  |
| 1 | 0.53251100  | -2.30053400 | 1.01811600  |
| 6 | 5.67337000  | 0.38048900  | -0.44716800 |
| 6 | 4.48001300  | 1.07854700  | 1.98049300  |
| 6 | 5.79890100  | 1.45112900  | 1.72367100  |
| 6 | 6.39545400  | 1.09339200  | 0.51152200  |
| 1 | 6.11716600  | 0.09210800  | -1.39466400 |
| 1 | 4.01405800  | 1.33220400  | 2.92955900  |
| 1 | 6.36186200  | 2.00787200  | 2.46675500  |

|   |            |             |             |
|---|------------|-------------|-------------|
| 1 | 7.42455500 | 1.37434300  | 0.30630200  |
| 8 | 3.67863800 | -0.70519000 | -1.12664700 |
| 5 | 2.38635800 | -0.14130300 | 1.26978100  |
| 1 | 1.96790200 | -0.09941700 | 2.27121700  |
| 6 | 1.66153800 | -0.68711000 | 0.27781600  |
| 6 | 3.73315500 | 0.36100000  | 1.03554300  |
| 6 | 4.34870500 | 0.02916600  | -0.18933200 |
| 6 | 2.22061400 | -0.61088600 | -1.14131400 |
| 6 | 1.86784500 | 0.75548100  | -1.76687000 |
| 1 | 2.24684000 | 1.57067100  | -1.14412000 |
| 1 | 2.31559700 | 0.83419100  | -2.76352600 |
| 1 | 0.78447900 | 0.87071300  | -1.86175000 |

*trans-5+11* complex

**E(RB3LYP) = -1272.192387 a.u.**

|   |             |             |             |
|---|-------------|-------------|-------------|
| 6 | 3.31988700  | 4.41769300  | -0.43137600 |
| 6 | 2.27562600  | 3.51072500  | -1.03787200 |
| 6 | 2.35375800  | 2.17215800  | -0.94261800 |
| 7 | 3.38018300  | 1.49688400  | -0.27523800 |
| 6 | 4.59772400  | 2.26734300  | -0.03411000 |
| 6 | 4.22394900  | 3.63819300  | 0.54198100  |
| 6 | 2.23837100  | -1.98280300 | -0.02082500 |
| 6 | 3.50207500  | -2.57157400 | -0.17596200 |
| 6 | 4.11630600  | -2.71989400 | -1.41793600 |
| 6 | 3.45650700  | -2.26336100 | -2.56086700 |
| 6 | 2.19925400  | -1.68409800 | -2.44670300 |
| 6 | 1.57283400  | -1.54669400 | -1.19340500 |
| 7 | 0.31006700  | -0.94300700 | -1.12678800 |
| 6 | 1.62315000  | -1.82111100 | 1.38733700  |
| 1 | 1.67818100  | -1.33084800 | -3.33370600 |
| 1 | 3.91600400  | -2.36214900 | -3.54009600 |
| 1 | 5.09532200  | -3.18277100 | -1.49118600 |
| 1 | 4.02428400  | -2.92681900 | 0.70736200  |
| 1 | 5.23255700  | 1.71304200  | 0.66529200  |
| 1 | 5.17460100  | 2.41212100  | -0.96394900 |
| 1 | 5.13371100  | 4.20455100  | 0.76921100  |
| 1 | 3.69292200  | 3.47959000  | 1.48771300  |
| 1 | 3.92945800  | 4.88727200  | -1.21867500 |
| 1 | 2.84090500  | 5.24989000  | 0.10220900  |
| 1 | 1.42269200  | 3.95272900  | -1.54332200 |
| 1 | 1.58277700  | 1.52356100  | -1.34851700 |
| 1 | 3.53709900  | 0.55582400  | -0.61315400 |
| 6 | 1.25517900  | -3.20961400 | 1.95988400  |
| 1 | 2.13432400  | -3.86075600 | 1.98225100  |
| 1 | 0.87943200  | -3.12540700 | 2.98494400  |
| 1 | 0.49361900  | -3.71484400 | 1.35788700  |
| 6 | 2.64901400  | -1.14698400 | 2.32955800  |
| 1 | 2.21131300  | -0.97394500 | 3.31810900  |
| 1 | 3.53337600  | -1.77291900 | 2.47864900  |
| 1 | 2.97262700  | -0.18487000 | 1.92077200  |
| 6 | -1.43291800 | 0.45237200  | 2.36881100  |
| 1 | -0.82858800 | 1.34024100  | 2.58548800  |
| 1 | -2.24222400 | 0.42860000  | 3.10317100  |
| 6 | -0.54375500 | -0.79372200 | 2.50552000  |
| 1 | -1.16490600 | -1.69581100 | 2.57760800  |
| 1 | 0.02210800  | -0.72737300 | 3.44009900  |
| 6 | 0.37946600  | -0.88809400 | 1.28438700  |
| 1 | 0.77786400  | 0.11724300  | 1.09094700  |
| 6 | -0.47856600 | -1.25687800 | 0.06686400  |
| 1 | -0.67706700 | -2.34290500 | 0.10647100  |
| 6 | -5.67739400 | 1.12235500  | 0.35447900  |
| 6 | -5.09628400 | -0.59837600 | -1.77103100 |
| 6 | -6.35025300 | 0.00419500  | -1.69077300 |
| 6 | -6.63778900 | 0.85930400  | -0.62280800 |
| 1 | -5.88350000 | 1.78052700  | 1.19198000  |
| 1 | -4.86658200 | -1.27751800 | -2.58851900 |
| 1 | -7.10033100 | -0.19534800 | -2.44946300 |
| 1 | -7.61428200 | 1.32929000  | -0.55082900 |
| 8 | -3.51827700 | 0.74998200  | 1.25627100  |

|   |             |             |             |
|---|-------------|-------------|-------------|
| 6 | -2.80640300 | -0.98329400 | -0.78048300 |
| 1 | -2.64069900 | -1.83085600 | -1.44491100 |
| 6 | -1.83359800 | -0.56866900 | 0.04959900  |
| 6 | -4.11532800 | -0.34742000 | -0.80267000 |
| 6 | -4.41884800 | 0.52834900  | 0.25781700  |
| 6 | -2.09008500 | 0.62587000  | 0.96601500  |
| 6 | -1.63937800 | 1.93132000  | 0.28989100  |
| 1 | -2.16088600 | 2.07009300  | -0.66172200 |
| 1 | -1.86713600 | 2.78069200  | 0.94214000  |
| 1 | -0.56348600 | 1.92237000  | 0.09369300  |
| 1 | -0.21604500 | -1.00323100 | -1.99017900 |

TS-5-tf

E(RB3LYP) = -1021.354302 a.u.

|   |             |             |             |
|---|-------------|-------------|-------------|
| 7 | 1.64648100  | 0.02953300  | 1.80606000  |
| 6 | 2.15063600  | 0.95820000  | 0.87979900  |
| 6 | 3.16562200  | 0.19211600  | 0.19435400  |
| 6 | 2.03691400  | 2.33368100  | 0.74680600  |
| 6 | 3.13187500  | 2.98888700  | 0.15771200  |
| 6 | 4.26313600  | 2.29326100  | -0.31492600 |
| 6 | 4.29609100  | 0.90524000  | -0.31685800 |
| 1 | 1.25647600  | 2.90281200  | 1.24258300  |
| 1 | 3.14449500  | 4.07568000  | 0.14317100  |
| 1 | 5.11719100  | 2.85978400  | -0.67347500 |
| 1 | 5.17371700  | 0.38229000  | -0.68697500 |
| 1 | 3.02169800  | -0.47592400 | 1.29620400  |
| 6 | 1.37633900  | -1.73280400 | 0.11180100  |
| 1 | 1.92918800  | -2.51003200 | 0.65553300  |
| 6 | 0.66739900  | -0.90070300 | 1.30207700  |
| 1 | 0.51291200  | -1.63868300 | 2.10205900  |
| 8 | -2.54994100 | -1.22071800 | -0.53536800 |
| 6 | -3.11927900 | 0.02195900  | -0.47689000 |
| 6 | -4.32155100 | 0.22995900  | -1.15166900 |
| 1 | -4.78128300 | -0.60387500 | -1.67200000 |
| 6 | -4.90816100 | 1.49596200  | -1.13797600 |
| 1 | -5.85005800 | 1.65374300  | -1.65520300 |
| 6 | -4.29681700 | 2.55259600  | -0.45715200 |
| 1 | -4.75839600 | 3.53501600  | -0.44450600 |
| 6 | -3.08482700 | 2.34139100  | 0.19733700  |
| 1 | -2.59139000 | 3.16216900  | 0.71207700  |
| 6 | -2.47368200 | 1.07973000  | 0.19758100  |
| 6 | -1.15855000 | 0.81233400  | 0.76823200  |
| 1 | -0.54193300 | 1.65471000  | 1.05989600  |
| 6 | -0.70726400 | -0.44812000 | 0.87274800  |
| 6 | -1.67168100 | -1.59359500 | 0.56582100  |
| 6 | -2.54223700 | -1.92906700 | 1.78760500  |
| 1 | -3.15869100 | -1.07222000 | 2.07068100  |
| 1 | -3.19889400 | -2.77471200 | 1.55843800  |
| 1 | -1.91663900 | -2.19615300 | 2.64480300  |
| 6 | -0.91123600 | -2.83802300 | 0.06639300  |
| 1 | -1.60845400 | -3.43898200 | -0.52551100 |
| 1 | -0.61066400 | -3.44975700 | 0.92531800  |
| 6 | 0.31091700  | -2.43383000 | -0.76148900 |
| 1 | -0.04493500 | -1.76807100 | -1.55132400 |
| 1 | 0.74742100  | -3.30860100 | -1.25710800 |
| 6 | 2.45263800  | -0.94807900 | -0.71217900 |
| 6 | 3.53758500  | -1.93946400 | -1.17098800 |
| 1 | 4.27675900  | -1.45079200 | -1.81300400 |
| 1 | 4.06216400  | -2.38272300 | -0.31849200 |
| 1 | 3.09080600  | -2.75163300 | -1.75426500 |
| 6 | 1.87257300  | -0.22752800 | -1.95037000 |
| 1 | 2.63363700  | 0.41737700  | -2.39769100 |
| 1 | 1.55728700  | -0.94379800 | -2.71520600 |
| 1 | 1.01311000  | 0.39676100  | -1.69208700 |

*trans*-5

**E(RB3LYP) = -1021.525991 a.u.**

|   |             |             |             |
|---|-------------|-------------|-------------|
| 6 | -5.25205700 | 2.21034800  | -0.34615300 |
| 6 | -5.88269100 | 0.96630000  | -0.42580200 |
| 6 | -5.13811700 | -0.21203900 | -0.34911800 |
| 6 | -3.75436300 | -0.14057800 | -0.19272700 |
| 6 | -3.09961200 | 1.10159900  | -0.11639400 |
| 6 | -3.86717400 | 2.27032700  | -0.19525400 |
| 8 | -3.04831300 | -1.30723500 | -0.18844200 |
| 6 | -1.70895000 | -1.36432500 | 0.37991300  |
| 6 | -0.97078400 | -0.03453500 | 0.27938000  |
| 6 | -1.64969500 | 1.09610400  | 0.02706000  |
| 6 | -0.99058700 | -2.40993600 | -0.49592700 |
| 6 | 0.51765300  | -2.47897400 | -0.24157400 |
| 6 | 1.20453900  | -1.11352900 | -0.43867500 |
| 6 | 0.53358900  | -0.09110000 | 0.50785500  |
| 6 | -1.86655500 | -1.82061000 | 1.84107400  |
| 6 | 2.76340400  | -1.16058500 | -0.28763600 |
| 6 | 3.33190700  | 0.26253100  | -0.15454200 |
| 6 | 2.51113600  | 1.35568200  | 0.19126100  |
| 7 | 1.13041700  | 1.21929900  | 0.33676600  |
| 6 | 4.70437300  | 0.50386400  | -0.31303900 |
| 6 | 5.26795600  | 1.76644500  | -0.14822800 |
| 6 | 4.44053200  | 2.83944300  | 0.18914700  |
| 6 | 3.07824900  | 2.63400300  | 0.35502100  |
| 6 | 3.33847100  | -1.84369600 | -1.55145900 |
| 6 | 3.20114000  | -1.97202000 | 0.95816400  |
| 1 | -5.83391800 | 3.12469500  | -0.40521100 |
| 1 | -6.96057700 | 0.90895100  | -0.54616500 |
| 1 | -5.60899700 | -1.18731900 | -0.41448700 |
| 1 | -3.36398100 | 3.23256000  | -0.13927800 |
| 1 | -1.12941800 | 2.04212100  | -0.08487000 |
| 1 | -1.17686700 | -2.13158700 | -1.53921000 |
| 1 | -1.45749000 | -3.38850500 | -0.33707700 |
| 1 | 0.95350800  | -3.22490100 | -0.91320400 |
| 1 | 0.70202400  | -2.84105600 | 0.77634100  |
| 1 | 0.99263100  | -0.76554600 | -1.45936700 |
| 1 | 0.69645800  | -0.45937800 | 1.53992000  |
| 1 | -0.89986100 | -1.97781400 | 2.32739500  |
| 1 | -2.42821500 | -2.75900200 | 1.87350100  |
| 1 | -2.41557300 | -1.06643200 | 2.41221700  |
| 1 | 5.35846800  | -0.32574500 | -0.56385500 |
| 1 | 6.33588600  | 1.90928100  | -0.27924500 |
| 1 | 4.85454600  | 3.83464400  | 0.32385600  |
| 1 | 2.42694500  | 3.46652800  | 0.61195400  |
| 1 | 4.42067200  | -1.97929600 | -1.48021200 |
| 1 | 3.13338400  | -1.24769700 | -2.44602800 |
| 1 | 2.90471600  | -2.83774500 | -1.69516000 |
| 1 | 4.28489200  | -1.90078300 | 1.08643100  |
| 1 | 2.94842700  | -3.03276700 | 0.86441000  |
| 1 | 2.74238700  | -1.58852300 | 1.87557600  |
| 1 | 0.71934800  | 1.92977800  | 0.92786600  |

*cis-5***E(RB3LYP) = -1021.522845 a.u.**

|   |             |             |             |
|---|-------------|-------------|-------------|
| 8 | -2.80938900 | 1.01129700  | -0.97638500 |
| 6 | -1.42426900 | 0.54995500  | -1.01381600 |
| 6 | -0.61992800 | 1.83016900  | -1.29952400 |
| 6 | 0.88580700  | 1.68916300  | -1.04430400 |
| 6 | -1.31070200 | -0.47542700 | -2.15338000 |
| 1 | -1.02419700 | 2.61310200  | -0.64713300 |
| 1 | -0.81126400 | 2.14671100  | -2.33081300 |
| 1 | 1.35422100  | 2.65531500  | -1.24954900 |
| 1 | 1.33345100  | 0.97043700  | -1.73954700 |
| 1 | -0.27803800 | -0.81132000 | -2.26887400 |
| 1 | -1.65404400 | -0.02404200 | -3.08963400 |
| 1 | -1.93401100 | -1.34934200 | -1.94064400 |
| 6 | -3.36167400 | -0.54927500 | 0.77635700  |
| 6 | -4.35989400 | -1.24327700 | 1.47265400  |
| 1 | -4.07359800 | -1.87286200 | 2.31166700  |
| 6 | -5.69956900 | -1.12905700 | 1.10616000  |
| 1 | -6.46272000 | -1.67401100 | 1.65267900  |
| 6 | -6.05336900 | -0.30178000 | 0.03641100  |
| 1 | -7.09563100 | -0.20328400 | -0.25282100 |
| 6 | -5.07687800 | 0.39902900  | -0.67227600 |
| 1 | -5.33297200 | 1.04746100  | -1.50356400 |
| 6 | -3.73651900 | 0.26890500  | -0.30800200 |
| 6 | -1.95000900 | -0.57821000 | 1.13292500  |
| 1 | -1.66814200 | -1.02848200 | 2.08344900  |
| 6 | -1.01333400 | -0.04889500 | 0.32790700  |
| 6 | 0.45697500  | -0.07998700 | 0.69506400  |
| 6 | 1.16505500  | 1.26435600  | 0.41050000  |
| 7 | 1.13334600  | -1.12361300 | -0.07690200 |
| 6 | 2.79979400  | 1.13454800  | 2.35036900  |
| 1 | 2.35870200  | 2.02772600  | 2.80947600  |
| 1 | 2.30775000  | 0.25499400  | 2.77333300  |
| 1 | 3.85291700  | 1.08689100  | 2.64392600  |
| 6 | 3.39747500  | 2.47903800  | 0.34063000  |
| 1 | 4.39276600  | 2.55623800  | 0.78718000  |
| 1 | 3.51791000  | 2.51777500  | -0.74453900 |
| 1 | 2.83516000  | 3.36447900  | 0.65812300  |
| 1 | 0.51531300  | -0.29239000 | 1.77420400  |
| 1 | 0.69841200  | 2.01220200  | 1.06674600  |
| 6 | 2.52558100  | -1.18021800 | -0.14229200 |
| 6 | 3.13768200  | -2.35281700 | -0.62216500 |
| 6 | 3.32153800  | -0.06602600 | 0.20995300  |
| 6 | 4.51786100  | -2.43480600 | -0.75420800 |
| 1 | 2.51084800  | -3.19864700 | -0.89590300 |
| 6 | 4.70950500  | -0.18024200 | 0.06062100  |
| 6 | 5.31654100  | -1.34189400 | -0.41352700 |
| 1 | 4.96776700  | -3.35170600 | -1.12435400 |
| 1 | 5.33846400  | 0.66265600  | 0.33000900  |
| 1 | 6.39614000  | -1.39213500 | -0.51372800 |
| 6 | 2.67640300  | 1.19342500  | 0.80484600  |
| 1 | 0.67205000  | -2.02290300 | -0.04571500 |

## 3-B

**E(RMPWB1K) = -1345.460306 a.u.**

|   |             |             |             |
|---|-------------|-------------|-------------|
| 8 | -2.91704200 | 0.78153300  | -1.53681800 |
| 6 | -1.68755900 | 1.21288700  | -0.93994500 |
| 6 | -2.06079800 | 2.13363400  | 0.22363600  |
| 6 | -0.94617900 | 3.01042400  | 0.77119300  |
| 6 | -0.99604300 | 1.97946800  | -2.04209600 |
| 6 | 2.49645600  | 1.73155100  | 2.03612800  |
| 6 | 2.06698100  | 3.76042800  | 0.59772700  |
| 1 | -2.47160700 | 1.52109300  | 1.02598500  |
| 1 | -2.86940300 | 2.76766200  | -0.13841400 |
| 1 | -1.38271900 | 3.61045900  | 1.57250100  |
| 1 | -0.63014100 | 3.72530800  | 0.01434200  |
| 1 | -0.05599200 | 2.40039400  | -1.69528900 |
| 1 | -1.63867300 | 2.79473000  | -2.36095300 |
| 1 | -0.80942300 | 1.33676600  | -2.89818600 |
| 1 | 3.31118200  | 1.39713400  | 1.39563800  |
| 1 | 2.03661600  | 0.85444100  | 2.47831800  |
| 1 | 2.95165800  | 2.31989100  | 2.83395600  |
| 1 | 2.44174900  | 4.47711000  | 1.32872500  |
| 1 | 1.34843600  | 4.27742200  | -0.03016700 |
| 1 | 2.92193200  | 3.48304000  | -0.01940900 |
| 6 | -3.05726300 | -1.01780700 | 0.01243900  |
| 6 | -3.85280800 | -1.94996600 | 0.67456600  |
| 1 | -3.37750700 | -2.66819500 | 1.32539300  |
| 6 | -5.21848700 | -1.95133300 | 0.50321700  |
| 1 | -5.83175700 | -2.66552100 | 1.02813000  |
| 6 | -5.79906500 | -1.03529400 | -0.36463700 |
| 1 | -6.86816100 | -1.04008300 | -0.51084700 |
| 6 | -5.02998200 | -0.11221400 | -1.04419300 |
| 1 | -5.46754200 | 0.59990900  | -1.72452600 |
| 6 | -3.66184200 | -0.09169900 | -0.84072300 |
| 6 | -1.62428900 | -1.03593700 | 0.04789600  |
| 1 | -1.12462700 | -1.92301100 | 0.40336800  |
| 6 | -0.91938900 | -0.00736200 | -0.45908200 |
| 6 | 3.29559300  | -2.10557600 | -0.70175800 |
| 1 | 2.78788400  | -2.97335000 | -0.31353900 |
| 6 | 4.54417300  | -2.19763300 | -1.28223200 |
| 1 | 5.02642000  | -3.15988300 | -1.35178100 |
| 6 | 5.17679300  | -1.06754900 | -1.77168700 |
| 1 | 6.15433400  | -1.14578500 | -2.22067000 |
| 6 | 4.55757500  | 0.16429300  | -1.67083900 |
| 1 | 5.05280300  | 1.05253100  | -2.03055900 |
| 6 | 3.30551000  | 0.26744400  | -1.09327300 |
| 6 | 2.67342000  | -0.87091300 | -0.62171700 |
| 6 | 0.49178600  | -0.10401600 | -0.69016800 |
| 1 | 0.86335200  | 0.44301500  | -1.54741200 |
| 6 | 0.20740600  | 2.24562500  | 1.32762100  |
| 1 | -0.05906300 | 1.35328100  | 1.87965300  |
| 6 | 1.50227900  | 2.56121100  | 1.28854900  |
| 7 | 1.36471800  | -0.81254100 | -0.06450300 |
| 1 | 2.83199200  | 1.23168500  | -0.97395000 |
| 5 | 1.15826500  | -1.63981200 | 1.33924500  |
| 9 | 0.72513600  | -2.89445700 | 0.97551000  |
| 9 | 2.38510000  | -1.65037700 | 1.92254700  |
| 9 | 0.23027900  | -0.96110500 | 2.08147900  |



TS-tf-B

E(RMPWB1K) = -1345.419862 a.u.

|   |             |             |             |
|---|-------------|-------------|-------------|
| 8 | -3.17151900 | 1.37147900  | 0.34950500  |
| 6 | -1.87804600 | 1.59007800  | -0.20236000 |
| 6 | -1.28297200 | 2.64720000  | 0.70457000  |
| 6 | 0.18033100  | 2.89327200  | 0.42930400  |
| 6 | -2.04792100 | 2.07784700  | -1.63302400 |
| 6 | 3.31541700  | 1.03560600  | 1.53701900  |
| 6 | 3.02774100  | 2.94179100  | -0.09929700 |
| 1 | -1.41629700 | 2.30883500  | 1.73050900  |
| 1 | -1.85615700 | 3.56455000  | 0.58873600  |
| 1 | 0.52159400  | 3.74564500  | 1.01596100  |
| 1 | 0.32261500  | 3.17148000  | -0.61573500 |
| 1 | -1.08941700 | 2.26740700  | -2.11048100 |
| 1 | -2.63336100 | 2.99395300  | -1.65005400 |
| 1 | -2.56473400 | 1.31912500  | -2.21524400 |
| 1 | 4.29025600  | 0.87159500  | 1.08646500  |
| 1 | 2.87208500  | 0.08949300  | 1.83218300  |
| 1 | 3.46413900  | 1.62135100  | 2.45058600  |
| 1 | 3.02743800  | 3.82557700  | 0.54617500  |
| 1 | 2.46439700  | 3.20973300  | -0.98814200 |
| 1 | 4.05686400  | 2.73010100  | -0.36941900 |
| 6 | -3.14224300 | -0.89268800 | -0.36248700 |
| 6 | -3.86024800 | -2.03323500 | -0.69769700 |
| 1 | -3.31937700 | -2.93415800 | -0.94576000 |
| 6 | -5.24062300 | -2.02111700 | -0.70158000 |
| 1 | -5.78891700 | -2.91179800 | -0.96353400 |
| 6 | -5.91692500 | -0.86268600 | -0.35401600 |
| 1 | -6.99584100 | -0.84946800 | -0.34795500 |
| 6 | -5.22207000 | 0.28399800  | -0.01629300 |
| 1 | -5.72889200 | 1.19402200  | 0.26122700  |
| 6 | -3.84163000 | 0.26421900  | -0.03057800 |
| 6 | -1.70096700 | -0.84754900 | -0.28906400 |
| 1 | -1.14853600 | -1.77381400 | -0.31749800 |
| 6 | -1.06482100 | 0.31853300  | -0.17389000 |
| 6 | 3.08469700  | -2.06960800 | -0.44448400 |
| 1 | 2.62382500  | -2.88494300 | 0.08523100  |
| 6 | 4.36827300  | -2.16754600 | -0.90575500 |
| 1 | 4.92114300  | -3.07765600 | -0.73190800 |
| 6 | 4.96944100  | -1.11413000 | -1.59743700 |
| 1 | 5.98488500  | -1.20298700 | -1.94961400 |
| 6 | 4.23270600  | 0.01212200  | -1.86611900 |
| 1 | 4.65670700  | 0.81291100  | -2.45313100 |
| 6 | 2.92132100  | 0.12721900  | -1.41275600 |
| 6 | 2.33910100  | -0.89370300 | -0.64814000 |
| 6 | 0.41860100  | 0.38576000  | -0.28680300 |
| 1 | 0.65668100  | 0.84112000  | -1.24450600 |
| 6 | 1.02193200  | 1.68085200  | 0.77355100  |
| 1 | 0.73166500  | 1.19430800  | 1.70229800  |
| 6 | 2.42513700  | 1.81745800  | 0.65633000  |
| 7 | 1.11035000  | -0.77057600 | -0.05071800 |
| 1 | 2.35483500  | 0.98222800  | -1.73792000 |
| 5 | 0.81606800  | -1.62651100 | 1.28207100  |
| 9 | 0.33899400  | -2.85894500 | 0.90644400  |
| 9 | 2.00760300  | -1.75796800 | 1.97378600  |
| 9 | -0.07166700 | -0.89375200 | 2.03268200  |

**TS-cf-B****E(RMPWB1K) = -1345.418785 a.u.**

|   |             |             |             |
|---|-------------|-------------|-------------|
| 6 | 4.83527900  | -2.44478300 | 0.31896600  |
| 6 | 5.57051200  | -1.39234300 | -0.20322400 |
| 6 | 4.95649600  | -0.19572800 | -0.52697800 |
| 6 | 3.60227100  | -0.04989500 | -0.30166200 |
| 6 | 2.84604500  | -1.09792000 | 0.21875100  |
| 6 | 3.47896500  | -2.29638200 | 0.52273500  |
| 8 | 2.99991200  | 1.10486700  | -0.65408500 |
| 6 | 1.85926500  | 1.51969400  | 0.09752300  |
| 6 | 0.92113000  | 0.35881300  | 0.31640700  |
| 6 | 1.43389600  | -0.87176300 | 0.40049600  |
| 6 | 1.24502300  | 2.59168700  | -0.78053700 |
| 6 | -0.12549000 | 3.05938000  | -0.33727600 |
| 6 | -1.22800200 | 2.01816700  | -0.26863900 |
| 6 | -0.44965800 | 0.64118800  | 0.79325500  |
| 6 | 2.33471400  | 2.06556200  | 1.43424800  |
| 6 | -1.85776600 | 1.52528500  | -1.41636000 |
| 6 | -1.18849000 | -1.02509600 | -1.34968700 |
| 6 | -1.76329900 | -1.12763100 | -0.07572500 |
| 7 | -1.37877200 | -0.32261900 | 0.97222700  |
| 6 | -1.73142900 | -1.71010200 | -2.43047100 |
| 6 | -2.84557000 | -2.49781300 | -2.26998800 |
| 6 | -3.39303100 | -2.64297500 | -0.99510700 |
| 6 | -2.86533600 | -1.98603700 | 0.08452500  |
| 6 | -1.29248600 | 1.67205600  | -2.78435100 |
| 6 | -3.29584800 | 1.16276500  | -1.33912900 |
| 1 | 5.32059700  | -3.37535500 | 0.56549400  |
| 1 | 6.63121200  | -1.50421000 | -0.36541100 |
| 1 | 5.50969900  | 0.63229700  | -0.93953800 |
| 1 | 2.89299100  | -3.10933700 | 0.92473200  |
| 1 | 0.79560200  | -1.70864000 | 0.64558100  |
| 1 | 1.22368700  | 2.19567300  | -1.79117800 |
| 1 | 1.92632200  | 3.44011500  | -0.80125500 |
| 1 | -0.44544700 | 3.86744500  | -0.99542000 |
| 1 | -0.04453200 | 3.50515400  | 0.65322900  |
| 1 | -1.95389900 | 2.22955500  | 0.50876200  |
| 1 | -0.40706700 | 1.27756500  | 1.66782300  |
| 1 | 1.50714600  | 2.42378800  | 2.04071000  |
| 1 | 3.02827400  | 2.88648900  | 1.27118900  |
| 1 | 2.84120400  | 1.28230400  | 1.99231400  |
| 1 | -1.26000000 | -1.62096400 | -3.39758900 |
| 1 | -3.27253600 | -3.02430700 | -3.10898700 |
| 1 | -4.25185800 | -3.28012700 | -0.85145500 |
| 1 | -3.30125100 | -2.09956100 | 1.06075900  |
| 1 | -1.83531600 | 1.05529800  | -3.49344600 |
| 1 | -0.23897900 | 1.42720400  | -2.84662300 |
| 1 | -1.39850400 | 2.71477600  | -3.09569100 |
| 1 | -3.53956500 | 0.32764100  | -1.99279700 |
| 1 | -3.86877900 | 2.02752900  | -1.68837700 |
| 1 | -3.60579700 | 0.94310600  | -0.32284200 |
| 5 | -2.36499000 | -0.12710100 | 2.22328700  |
| 9 | -3.59745900 | 0.25485100  | 1.72124200  |
| 9 | -1.82707800 | 0.88029400  | 2.99398200  |
| 9 | -2.44109300 | -1.31592900 | 2.89726500  |
| 1 | -0.26864500 | -0.48824600 | -1.48836700 |

*trans-4-B*

**E (RMPWB1K) = -1345.468388 a.u.**

|   |             |             |             |
|---|-------------|-------------|-------------|
| 8 | -3.10632000 | 1.42248700  | 0.51557200  |
| 6 | -1.82468700 | 1.60846600  | -0.07089600 |
| 6 | -1.10848300 | 2.54224700  | 0.88496800  |
| 6 | 0.35401300  | 2.72593100  | 0.53766500  |
| 6 | -2.01884600 | 2.23124400  | -1.44573600 |
| 6 | 3.37879300  | 0.88213700  | 1.50537100  |
| 6 | 3.13208300  | 2.81761500  | -0.02185300 |
| 1 | -1.19829700 | 2.11339600  | 1.88182100  |
| 1 | -1.62950300 | 3.49735800  | 0.89396700  |
| 1 | 0.79343500  | 3.44276700  | 1.22679200  |
| 1 | 0.45436900  | 3.15721800  | -0.45958500 |
| 1 | -1.06835800 | 2.40325500  | -1.94551000 |
| 1 | -2.54096700 | 3.18085100  | -1.35587200 |
| 1 | -2.60889100 | 1.56253300  | -2.06764000 |
| 1 | 4.44690400  | 0.83305000  | 1.30046700  |
| 1 | 3.03114600  | -0.11026900 | 1.78499700  |
| 1 | 3.22973700  | 1.53806200  | 2.36064500  |
| 1 | 2.92211800  | 3.50470300  | 0.79240800  |
| 1 | 2.68890200  | 3.22620700  | -0.92788900 |
| 1 | 4.21108200  | 2.80214100  | -0.14757700 |
| 6 | -3.24230500 | -0.76104800 | -0.42105800 |
| 6 | -4.04534800 | -1.81738000 | -0.82811500 |
| 1 | -3.57354800 | -2.71833000 | -1.19124000 |
| 6 | -5.42189100 | -1.72847800 | -0.75973900 |
| 1 | -6.03420700 | -2.55618500 | -1.08037900 |
| 6 | -6.00953300 | -0.57616900 | -0.26478900 |
| 1 | -7.08415700 | -0.50190600 | -0.20148400 |
| 6 | -5.22909200 | 0.48792500  | 0.14828300  |
| 1 | -5.66514600 | 1.39234900  | 0.54090600  |
| 6 | -3.85426900 | 0.39384400  | 0.06157000  |
| 6 | -1.79552700 | -0.81067700 | -0.41423500 |
| 1 | -1.31029000 | -1.76504900 | -0.55254400 |
| 6 | -1.09298200 | 0.29487500  | -0.19346400 |
| 6 | 3.13794900  | -2.02315800 | -0.60551500 |
| 1 | 2.68567400  | -2.96226200 | -0.33955600 |
| 6 | 4.41886100  | -1.93467300 | -0.99783400 |
| 1 | 5.01659900  | -2.83201200 | -1.04656600 |
| 6 | 5.02539800  | -0.68575500 | -1.37888600 |
| 1 | 6.05190300  | -0.68530900 | -1.70938900 |
| 6 | 4.31696500  | 0.44336800  | -1.35986200 |
| 1 | 4.75675000  | 1.36770200  | -1.70000500 |
| 6 | 2.89876700  | 0.48272400  | -0.93546200 |
| 6 | 2.32394900  | -0.84495100 | -0.57359400 |
| 6 | 0.39763200  | 0.37659000  | -0.28443100 |
| 1 | 0.58172200  | 0.72419000  | -1.30870100 |
| 6 | 1.08812900  | 1.39889700  | 0.62360300  |
| 1 | 0.96251500  | 1.01465100  | 1.63651100  |
| 6 | 2.61545800  | 1.42572600  | 0.30486800  |
| 7 | 1.10536200  | -0.87650400 | -0.13420700 |
| 1 | 2.33449500  | 0.91620900  | -1.76843800 |
| 5 | 0.70904800  | -1.96738400 | 1.04667700  |
| 9 | 0.20879300  | -3.08133800 | 0.43366700  |
| 9 | 1.88908100  | -2.22998300 | 1.70170200  |
| 9 | -0.15969600 | -1.30296400 | 1.85354200  |

*cis-4-B***E (RMPWB1K) = -1345.481828 a.u.**

|   |             |             |             |
|---|-------------|-------------|-------------|
| 6 | -4.76584700 | -1.94549400 | 1.09335700  |
| 6 | -5.34830800 | -0.70577500 | 1.30021200  |
| 6 | -4.65447000 | 0.45437100  | 1.00877000  |
| 6 | -3.37200700 | 0.36547400  | 0.50528100  |
| 6 | -2.76131800 | -0.87026200 | 0.30680300  |
| 6 | -3.47574700 | -2.02219200 | 0.60649300  |
| 8 | -2.68434000 | 1.50370500  | 0.26820800  |
| 6 | -1.70109600 | 1.46861900  | -0.76232300 |
| 6 | -0.83520700 | 0.24194600  | -0.62938400 |
| 6 | -1.38895700 | -0.87396800 | -0.15362200 |
| 6 | -0.88684600 | 2.72442100  | -0.53459700 |
| 6 | 0.36786800  | 2.74796000  | -1.37790300 |
| 6 | 1.32904500  | 1.59697200  | -1.10208600 |
| 6 | 0.56165600  | 0.26161400  | -1.21743500 |
| 6 | -2.40295700 | 1.46752200  | -2.10994500 |
| 6 | 2.17914100  | 1.67672700  | 0.19107800  |
| 6 | 1.59638700  | 0.63350400  | 1.20364300  |
| 6 | 1.76750400  | -0.69342800 | 0.54783100  |
| 7 | 1.32836800  | -0.83227100 | -0.65877200 |
| 6 | 2.16202700  | 0.72927800  | 2.56802800  |
| 6 | 2.81994500  | -0.27893000 | 3.13914900  |
| 6 | 2.99116600  | -1.52443500 | 2.43553600  |
| 6 | 2.49237800  | -1.74131000 | 1.20751200  |
| 6 | 2.21830100  | 3.06182900  | 0.81454400  |
| 6 | 3.61838500  | 1.28140600  | -0.13873600 |
| 1 | -5.31352400 | -2.84675300 | 1.31787800  |
| 1 | -6.35375400 | -0.63954000 | 1.68608800  |
| 1 | -5.08886300 | 1.42912400  | 1.16170600  |
| 1 | -3.00412900 | -2.98164700 | 0.45425100  |
| 1 | -0.83411900 | -1.80059100 | -0.11388100 |
| 1 | -0.64910700 | 2.76054900  | 0.52763400  |
| 1 | -1.51011200 | 3.59116400  | -0.74542200 |
| 1 | 0.88068500  | 3.69780000  | -1.25529900 |
| 1 | 0.08819500  | 2.70274400  | -2.43081100 |
| 1 | 2.04456600  | 1.59093000  | -1.92275700 |
| 1 | 0.45984100  | 0.04079500  | -2.27672500 |
| 1 | -1.68713300 | 1.44454900  | -2.92745100 |
| 1 | -3.02292400 | 2.35515300  | -2.20969600 |
| 1 | -3.03152700 | 0.58519200  | -2.19539700 |
| 1 | 1.99675500  | 1.64987500  | 3.10558800  |
| 1 | 3.21290900  | -0.18727200 | 4.13914600  |
| 1 | 3.53539000  | -2.31781700 | 2.92520400  |
| 1 | 2.61814300  | -2.67926700 | 0.69771900  |
| 1 | 2.92742900  | 3.07963600  | 1.63821400  |
| 1 | 1.25329200  | 3.39041400  | 1.19161600  |
| 1 | 2.56083600  | 3.79165200  | 0.08542200  |
| 1 | 4.20798700  | 1.17728400  | 0.77116900  |
| 1 | 4.07903500  | 2.05433500  | -0.75050000 |
| 1 | 3.67265300  | 0.34690400  | -0.69259300 |
| 5 | 1.61377700  | -2.15921300 | -1.53304100 |
| 9 | 2.97871000  | -2.29513600 | -1.57030300 |
| 9 | 1.06455800  | -1.93165500 | -2.76228800 |
| 9 | 1.00979800  | -3.19692900 | -0.86014300 |
| 1 | 0.52086300  | 0.83546900  | 1.27119600  |

*trans-4+11* complex

**E(RMPWB1K) = -1271.534301 a.u.**

|   |             |             |             |
|---|-------------|-------------|-------------|
| 6 | -1.24232400 | 4.14607500  | -1.85842100 |
| 6 | -0.32986500 | 3.14930100  | -1.21868700 |
| 6 | -0.71991100 | 2.38571000  | -0.19909300 |
| 7 | -1.98776000 | 2.43723700  | 0.35534100  |
| 6 | -2.74088400 | 3.63304900  | 0.06814300  |
| 6 | -2.67924700 | 3.91015200  | -1.42013100 |
| 6 | -2.81227400 | -0.92552000 | 0.21617200  |
| 6 | -4.24299100 | -1.20024900 | 0.54568300  |
| 6 | -4.77042300 | -0.88768200 | 1.72635600  |
| 6 | -3.93895100 | -0.34703900 | 2.78310900  |
| 6 | -2.61061300 | -0.27839400 | 2.65208500  |
| 6 | -1.94755900 | -0.75388600 | 1.44378600  |
| 7 | -0.69277900 | -0.94447200 | 1.51009200  |
| 6 | -2.17188300 | -1.88147400 | -0.79843200 |
| 1 | -1.96813100 | 0.03577400  | 3.46004200  |
| 1 | -4.40764600 | -0.04263900 | 3.70702100  |
| 1 | -5.82167200 | -1.03831800 | 1.91694800  |
| 1 | -4.87179800 | -1.59725900 | -0.23714800 |
| 1 | -2.81127300 | 0.07782600  | -0.23670200 |
| 1 | -3.76870200 | 3.48675600  | 0.39155900  |
| 1 | -2.33986000 | 4.49821100  | 0.60827500  |
| 1 | -3.30723600 | 4.76349300  | -1.66563600 |
| 1 | -3.08409900 | 3.04498500  | -1.94320700 |
| 1 | -0.93445300 | 5.16360600  | -1.60707700 |
| 1 | -1.17440000 | 4.07839300  | -2.94440400 |
| 1 | 0.66959100  | 3.02661900  | -1.60395400 |
| 1 | -0.06164600 | 1.64463200  | 0.23404100  |
| 1 | -2.02948300 | 2.13808000  | 1.31184300  |
| 6 | -2.25856200 | -3.30597400 | -0.27039300 |
| 1 | -3.29876000 | -3.62031100 | -0.20905900 |
| 1 | -1.74259900 | -4.01028100 | -0.91929300 |
| 1 | -1.83443500 | -3.38867500 | 0.72828100  |
| 6 | -2.87603700 | -1.78129300 | -2.14246500 |
| 1 | -2.41044700 | -2.44117900 | -2.87052800 |
| 1 | -3.92192200 | -2.07090500 | -2.07701000 |
| 1 | -2.82960300 | -0.76482500 | -2.53093700 |
| 6 | 1.56478100  | -2.24137800 | -1.74674500 |
| 1 | 2.13259300  | -2.40719100 | -2.65937600 |
| 1 | 1.75130000  | -3.09794800 | -1.10073800 |
| 6 | 0.07533600  | -2.11253400 | -2.05353500 |
| 1 | -0.32388700 | -3.11159900 | -2.22082100 |
| 1 | -0.06051300 | -1.57588400 | -2.99036200 |
| 6 | -0.72176200 | -1.39983200 | -0.95291600 |
| 1 | -0.79373300 | -0.34038600 | -1.21140200 |
| 6 | 0.01507300  | -1.47258600 | 0.37688700  |
| 1 | 0.19568000  | -2.53432900 | 0.59516500  |
| 6 | 5.45944000  | -0.22939000 | -0.08588800 |
| 6 | 4.07489300  | 1.00424900  | 1.96962300  |
| 6 | 5.42851800  | 1.23366400  | 1.81927000  |
| 6 | 6.11911400  | 0.60686900  | 0.79506700  |
| 1 | 5.97712100  | -0.72599400 | -0.89075500 |
| 1 | 3.53063400  | 1.46801800  | 2.77918000  |
| 1 | 5.94580800  | 1.88852000  | 2.50235100  |

|   |            |             |             |
|---|------------|-------------|-------------|
| 1 | 7.17839400 | 0.77455800  | 0.67583900  |
| 8 | 3.48267800 | -1.27908900 | -0.79599500 |
| 6 | 1.99922500 | -0.21108200 | 1.25931200  |
| 1 | 1.49878200 | -0.04782300 | 2.20159000  |
| 6 | 1.37607700 | -0.84639800 | 0.27095700  |
| 6 | 3.38954200 | 0.16919300  | 1.09751900  |
| 6 | 4.10103800 | -0.43522300 | 0.05824600  |
| 6 | 2.10192000 | -1.01770100 | -1.03741000 |
| 6 | 2.00226900 | 0.23331200  | -1.89401700 |
| 1 | 2.43075800 | 1.07760300  | -1.35824200 |
| 1 | 2.55338500 | 0.08951700  | -2.82090400 |
| 1 | 0.97096400 | 0.47868500  | -2.12913700 |

TS-6

**E(RMPWB1K) = -1271.497047 a.u.**

|   |             |             |             |
|---|-------------|-------------|-------------|
| 6 | -0.41328100 | -2.80801700 | 2.45591900  |
| 6 | 0.01493500  | -2.61220700 | 1.03952500  |
| 6 | -0.80884700 | -2.21721100 | 0.08391900  |
| 7 | -2.19163900 | -1.94104200 | 0.31980600  |
| 6 | -2.71429100 | -2.39513200 | 1.60693500  |
| 6 | -1.72052800 | -2.07869600 | 2.70081800  |
| 6 | -2.83440900 | 0.55561700  | -0.51161900 |
| 6 | -4.21900300 | 0.22460100  | -0.54497200 |
| 6 | -4.73605800 | -0.66733800 | -1.43266200 |
| 6 | -3.89445800 | -1.14831300 | -2.47274400 |
| 6 | -2.60251500 | -0.75880500 | -2.57999600 |
| 6 | -1.99316600 | 0.15603800  | -1.63960000 |
| 7 | -0.73934900 | 0.43120200  | -1.79157200 |
| 6 | -2.31829900 | 1.75686000  | 0.26261600  |
| 1 | -1.97806800 | -1.09331000 | -3.39438500 |
| 1 | -4.30213100 | -1.83138400 | -3.20486100 |
| 1 | -5.77240800 | -0.96003000 | -1.38965300 |
| 1 | -4.86245800 | 0.63180300  | 0.22218800  |
| 1 | -2.41967200 | -0.70954700 | 0.11479100  |
| 1 | -3.66958500 | -1.90075000 | 1.76587600  |
| 1 | -2.88998600 | -3.46957300 | 1.56184800  |
| 1 | -2.14978200 | -2.34045200 | 3.66423800  |
| 1 | -1.53307600 | -1.00478500 | 2.71409600  |
| 1 | -0.51759900 | -3.87119100 | 2.68037500  |
| 1 | 0.35753900  | -2.43323800 | 3.12613100  |
| 1 | 1.05493100  | -2.73462100 | 0.77866600  |
| 1 | -0.48865800 | -1.97337800 | -0.91723200 |
| 1 | -2.75344700 | -2.28704200 | -0.45151700 |
| 6 | -2.53300200 | 2.99797000  | -0.60014300 |
| 1 | -3.59986700 | 3.17203800  | -0.72614400 |
| 1 | -2.10154600 | 3.89379100  | -0.15589700 |
| 1 | -2.10278900 | 2.86297000  | -1.58982500 |
| 6 | -3.02172500 | 1.94727000  | 1.59607000  |
| 1 | -2.60000400 | 2.79439600  | 2.13280000  |
| 1 | -4.08185500 | 2.15183700  | 1.46730300  |
| 1 | -2.92347400 | 1.06500900  | 2.22853100  |
| 6 | 1.39612300  | 2.68113000  | 0.98187500  |
| 1 | 1.94287400  | 3.15463300  | 1.79426300  |
| 1 | 1.53210200  | 3.30820800  | 0.10304500  |
| 6 | -0.08967800 | 2.55185200  | 1.32668300  |
| 1 | -0.56082600 | 3.52105300  | 1.17470300  |
| 1 | -0.20032000 | 2.33013100  | 2.38710700  |
| 6 | -0.82444000 | 1.48309300  | 0.50379700  |
| 1 | -0.78493800 | 0.53681800  | 1.05437200  |
| 6 | -0.09234800 | 1.25468800  | -0.81569500 |
| 1 | 0.06929800  | 2.24922800  | -1.26024500 |
| 6 | 5.37220500  | 0.33332500  | 0.03861300  |
| 6 | 4.02031400  | -1.52370600 | -1.50398400 |
| 6 | 5.37705900  | -1.66914500 | -1.28921900 |
| 6 | 6.05109600  | -0.73265900 | -0.52383200 |
| 1 | 5.87897400  | 1.07382300  | 0.63645300  |
| 1 | 3.48848400  | -2.23044000 | -2.12445900 |
| 1 | 5.90941200  | -2.49943600 | -1.72590100 |

|   |            |             |             |
|---|------------|-------------|-------------|
| 1 | 7.11264400 | -0.83293100 | -0.35766200 |
| 8 | 3.37354500 | 1.52739100  | 0.36701900  |
| 6 | 1.92208600 | -0.18129400 | -1.23057900 |
| 1 | 1.43223300 | -0.62884500 | -2.08232700 |
| 6 | 1.28126400 | 0.72981300  | -0.50541500 |
| 6 | 3.31567100 | -0.46340200 | -0.94988100 |
| 6 | 4.01143200 | 0.46020100  | -0.16481500 |
| 6 | 1.99656100 | 1.32598000  | 0.68132700  |
| 6 | 1.93535200 | 0.42565700  | 1.90520000  |
| 1 | 2.37146800 | -0.54428500 | 1.68098200  |
| 1 | 2.49337900 | 0.88600400  | 2.71804800  |
| 1 | 0.90940900 | 0.29423200  | 2.23165900  |



IN1

E(RMPWB1K)= -1271.506761 a.u.

|   |             |             |             |
|---|-------------|-------------|-------------|
| 6 | -1.26804700 | 3.63146500  | -2.05356100 |
| 6 | -0.41658000 | 2.87356600  | -1.09240500 |
| 6 | -0.88339200 | 2.06208600  | -0.16286000 |
| 7 | -2.31139900 | 1.87635000  | 0.01678600  |
| 6 | -3.15917100 | 2.89694100  | -0.62164500 |
| 6 | -2.69629500 | 3.11795000  | -2.04053200 |
| 6 | -2.73944700 | -1.07383500 | 0.51603900  |
| 6 | -4.05765100 | -0.67315100 | 0.39429000  |
| 6 | -4.66345500 | 0.22465600  | 1.27272100  |
| 6 | -3.91734900 | 0.65344400  | 2.37036600  |
| 6 | -2.59510600 | 0.30178400  | 2.51974700  |
| 6 | -1.91007800 | -0.53383600 | 1.57178000  |
| 7 | -0.61524500 | -0.69189100 | 1.69462200  |
| 6 | -2.09472600 | -2.12413300 | -0.35436900 |
| 1 | -2.02094800 | 0.63764300  | 3.37008000  |
| 1 | -4.37817800 | 1.28698000  | 3.11619100  |
| 1 | -5.70058600 | 0.49450400  | 1.15859900  |
| 1 | -4.64714600 | -1.07821600 | -0.41677200 |
| 1 | -2.58037100 | 0.92182900  | -0.28451300 |
| 1 | -4.17953000 | 2.53603100  | -0.55020300 |
| 1 | -3.06445000 | 3.80682600  | -0.03450500 |
| 1 | -3.36784100 | 3.81429700  | -2.53440400 |
| 1 | -2.75819900 | 2.17629300  | -2.58527500 |
| 1 | -1.23882300 | 4.69322100  | -1.80317500 |
| 1 | -0.84528200 | 3.54985000  | -3.05287300 |
| 1 | 0.65615300  | 2.97375500  | -1.15874200 |
| 1 | -0.29007700 | 1.45708900  | 0.50853600  |
| 1 | -2.51920500 | 1.78517200  | 1.02745600  |
| 6 | -2.07828000 | -3.42957900 | 0.44081800  |
| 1 | -3.09667600 | -3.78342200 | 0.58321200  |
| 1 | -1.51833800 | -4.21491800 | -0.06566500 |
| 1 | -1.64267500 | -3.27509900 | 1.42473300  |
| 6 | -2.83163800 | -2.33995000 | -1.66398000 |
| 1 | -2.32115900 | -3.08124700 | -2.27404000 |
| 1 | -3.84223000 | -2.70560400 | -1.49831400 |
| 1 | -2.89554600 | -1.41625500 | -2.24011700 |
| 6 | 1.64003000  | -2.51518600 | -1.31487900 |
| 1 | 2.19801100  | -2.82941700 | -2.19448700 |
| 1 | 1.87391100  | -3.22369300 | -0.52274700 |
| 6 | 0.14119300  | -2.49988700 | -1.60129700 |
| 1 | -0.21949100 | -3.52626300 | -1.56459100 |
| 1 | -0.03192000 | -2.16158500 | -2.62202500 |
| 6 | -0.66657600 | -1.62303400 | -0.63565700 |
| 1 | -0.79119000 | -0.63463300 | -1.09350300 |
| 6 | 0.08247200  | -1.41361900 | 0.67820100  |
| 1 | 0.33769700  | -2.42307500 | 1.04463100  |
| 6 | 5.45497700  | -0.01970300 | -0.19948500 |
| 6 | 4.05075600  | 1.49875900  | 1.63734200  |
| 6 | 5.38500200  | 1.76927800  | 1.40052100  |
| 6 | 6.08638900  | 1.00194300  | 0.48571500  |
| 1 | 5.98168600  | -0.63148800 | -0.91429500 |
| 1 | 3.50104800  | 2.07307900  | 2.36891800  |
| 1 | 5.87920200  | 2.56538800  | 1.93489500  |

|   |            |             |             |
|---|------------|-------------|-------------|
| 1 | 7.13066700 | 1.20080700  | 0.29997900  |
| 8 | 3.53047900 | -1.29451200 | -0.62857600 |
| 6 | 2.02712300 | 0.07317000  | 1.23113300  |
| 1 | 1.52647500 | 0.38081600  | 2.13722400  |
| 6 | 1.41675400 | -0.77042500 | 0.40226200  |
| 6 | 3.39280800 | 0.48067100  | 0.96031500  |
| 6 | 4.11582200 | -0.27086000 | 0.02950500  |
| 6 | 2.13022400 | -1.15818900 | -0.86661200 |
| 6 | 1.94950400 | -0.10433800 | -1.94894300 |
| 1 | 2.36089700 | 0.84297900  | -1.60706500 |
| 1 | 2.47521200 | -0.40845500 | -2.85169500 |
| 1 | 0.89998400 | 0.04577700  | -2.18388700 |

*trans-5+11* complex

**E(RMPWB1K) = -1271.580025 a.u.**

|   |             |             |             |
|---|-------------|-------------|-------------|
| 6 | 3.09085200  | 4.23404200  | -0.18176900 |
| 6 | 2.12508400  | 3.34117300  | -0.89290400 |
| 6 | 2.30777700  | 2.02309400  | -0.96514600 |
| 7 | 3.38369100  | 1.36104400  | -0.40704700 |
| 6 | 4.51743100  | 2.18729800  | -0.07969500 |
| 6 | 4.03628400  | 3.40947400  | 0.67799800  |
| 6 | 2.24214200  | -1.83857100 | -0.07233900 |
| 6 | 3.54415100  | -2.28959600 | -0.25029700 |
| 6 | 4.16676600  | -2.30262300 | -1.48269000 |
| 6 | 3.46957600  | -1.84973000 | -2.59042000 |
| 6 | 2.16967900  | -1.41641600 | -2.45203200 |
| 6 | 1.53803000  | -1.41756400 | -1.20836500 |
| 7 | 0.23896200  | -0.94978400 | -1.11693800 |
| 6 | 1.64906900  | -1.75896200 | 1.32858200  |
| 1 | 1.61998800  | -1.06460900 | -3.31341600 |
| 1 | 3.93520900  | -1.83888500 | -3.56377400 |
| 1 | 5.18065200  | -2.65725300 | -1.57700800 |
| 1 | 4.09205500  | -2.63462000 | 0.61401900  |
| 1 | 5.21278100  | 1.60844900  | 0.52384200  |
| 1 | 5.05015800  | 2.51430800  | -0.98033900 |
| 1 | 4.88692000  | 4.00428500  | 1.00331000  |
| 1 | 3.51323600  | 3.06981600  | 1.57075400  |
| 1 | 3.65877100  | 4.83621900  | -0.89498900 |
| 1 | 2.55562900  | 4.94765100  | 0.44516300  |
| 1 | 1.23706700  | 3.76679000  | -1.33263500 |
| 1 | 1.58146900  | 1.38162800  | -1.44082000 |
| 1 | 3.60539700  | 0.48705900  | -0.84909500 |
| 6 | 1.37551700  | -3.15848900 | 1.87065000  |
| 1 | 2.28720900  | -3.75183500 | 1.85140500  |
| 1 | 1.03133900  | -3.11407800 | 2.90266000  |
| 1 | 0.63062300  | -3.69050100 | 1.28386800  |
| 6 | 2.63687300  | -1.05718800 | 2.25880700  |
| 1 | 2.19270500  | -0.90105100 | 3.23964800  |
| 1 | 3.53436600  | -1.65161400 | 2.40996000  |
| 1 | 2.92734000  | -0.09433100 | 1.84537500  |
| 6 | -1.43889800 | 0.31394400  | 2.38655500  |
| 1 | -0.87473700 | 1.21276300  | 2.63071800  |
| 1 | -2.25067300 | 0.23678400  | 3.10375800  |
| 6 | -0.51524100 | -0.88750900 | 2.48158800  |
| 1 | -1.09574400 | -1.81118500 | 2.52334700  |
| 1 | 0.05575700  | -0.83415800 | 3.40578700  |
| 6 | 0.37616700  | -0.90855200 | 1.25815300  |
| 1 | 0.70992000  | 0.11469200  | 1.05879200  |
| 6 | -0.48043200 | -1.31914600 | 0.07604900  |
| 1 | -0.62182900 | -2.40759000 | 0.11857200  |
| 6 | -5.56240900 | 1.15992300  | 0.33140100  |
| 6 | -5.04244900 | -0.58976300 | -1.75085200 |
| 6 | -6.24631000 | 0.08648500  | -1.70734900 |
| 6 | -6.50306900 | 0.95718600  | -0.66117800 |
| 1 | -5.74359800 | 1.83079500  | 1.15552500  |
| 1 | -4.83468700 | -1.28027300 | -2.55540400 |
| 1 | -6.98201800 | -0.06722300 | -2.48055600 |
| 1 | -7.44201200 | 1.48707000  | -0.61854000 |

|   |             |             |             |
|---|-------------|-------------|-------------|
| 8 | -3.47666500 | 0.65315900  | 1.27871100  |
| 6 | -2.80886200 | -1.08300400 | -0.72856600 |
| 1 | -2.65360500 | -1.91854700 | -1.39972000 |
| 6 | -1.84487300 | -0.68852800 | 0.09955600  |
| 6 | -4.08372600 | -0.39791900 | -0.76674700 |
| 6 | -4.35577600 | 0.48966000  | 0.27244100  |
| 6 | -2.08130800 | 0.49772200  | 1.00072600  |
| 6 | -1.58897400 | 1.75469000  | 0.30381800  |
| 1 | -2.12786600 | 1.89340200  | -0.63108500 |
| 1 | -1.75580500 | 2.62074700  | 0.94004000  |
| 1 | -0.52756300 | 1.68188800  | 0.07828400  |
| 1 | -0.29213200 | -1.02746400 | -1.96510600 |

*trans-4***E (RMPWB1K) = -1021.164490 a.u.**

|   |             |             |             |
|---|-------------|-------------|-------------|
| 8 | -2.94051900 | -1.24356600 | -0.48004800 |
| 6 | -1.66290100 | -1.32694100 | 0.14745200  |
| 6 | -0.90323000 | -2.31322200 | -0.71771400 |
| 6 | 0.55373500  | -2.40996100 | -0.33320500 |
| 6 | -1.86455300 | -1.82615900 | 1.56692600  |
| 6 | 3.51403100  | -1.26148800 | -1.45095800 |
| 6 | 3.12756900  | -2.24164500 | 0.79526600  |
| 1 | -0.99746600 | -1.97200600 | -1.74646400 |
| 1 | -1.39306400 | -3.28179100 | -0.65203400 |
| 1 | 1.04953700  | -3.14133700 | -0.96893100 |
| 1 | 0.63712100  | -2.78370700 | 0.68578600  |
| 1 | -0.91917500 | -1.90419600 | 2.09639800  |
| 1 | -2.34386200 | -2.80125600 | 1.55713400  |
| 1 | -2.49679700 | -1.12804800 | 2.10873600  |
| 1 | 4.57943300  | -1.39870600 | -1.28561300 |
| 1 | 3.38031600  | -0.38723000 | -2.08377800 |
| 1 | 3.14265500  | -2.12921000 | -1.99261700 |
| 1 | 2.95006700  | -3.20970900 | 0.33695900  |
| 1 | 2.55919000  | -2.19704800 | 1.72222800  |
| 1 | 4.18266200  | -2.19481700 | 1.05198800  |
| 6 | -3.11631700 | 1.07091500  | 0.01695200  |
| 6 | -3.93386400 | 2.17780400  | 0.17637700  |
| 1 | -3.47792500 | 3.13424400  | 0.37984800  |
| 6 | -5.30534600 | 2.06712700  | 0.07417600  |
| 1 | -5.92955800 | 2.93565200  | 0.20182100  |
| 6 | -5.87103600 | 0.83656900  | -0.20103200 |
| 1 | -6.94113400 | 0.74088500  | -0.28732700 |
| 6 | -5.07376800 | -0.27954500 | -0.36426300 |
| 1 | -5.49265100 | -1.24662700 | -0.58620600 |
| 6 | -3.70508500 | -0.15893600 | -0.25190100 |
| 6 | -1.67281800 | 1.12048600  | 0.09344600  |
| 1 | -1.17074000 | 2.07357700  | 0.11611000  |
| 6 | -0.96109200 | 0.00335100  | 0.16033200  |
| 6 | 2.98295900  | 2.61187600  | -0.30432400 |
| 1 | 2.33983500  | 3.41087700  | -0.63319700 |
| 6 | 4.31116000  | 2.72910400  | -0.26715000 |
| 1 | 4.78127800  | 3.65150800  | -0.56845600 |
| 6 | 5.15234700  | 1.63529200  | 0.16976900  |
| 1 | 6.22045000  | 1.77997100  | 0.18437600  |
| 6 | 4.62882200  | 0.47580500  | 0.55083700  |
| 1 | 5.27400600  | -0.32361700 | 0.88089100  |
| 6 | 3.16417700  | 0.22546800  | 0.56260000  |
| 6 | 2.33457200  | 1.37797000  | 0.08262500  |
| 6 | 0.52845200  | 0.00850300  | 0.35877400  |
| 1 | 0.72610500  | -0.21580500 | 1.42065900  |
| 6 | 1.24531700  | -1.06645600 | -0.46133900 |
| 1 | 1.13880400  | -0.73929300 | -1.49733700 |
| 6 | 2.75711500  | -1.10360800 | -0.14305300 |
| 7 | 1.06800400  | 1.29682500  | 0.03222300  |
| 1 | 2.86756400  | 0.08459700  | 1.61030100  |

TS-5-tf

**E(RMPWB1K) = -1021.045397 a.u.**

|   |             |             |             |
|---|-------------|-------------|-------------|
| 7 | 1.65315400  | -0.01703700 | 1.80418500  |
| 6 | 2.14395300  | 0.90843400  | 0.90960600  |
| 6 | 3.15050900  | 0.16712500  | 0.21626800  |
| 6 | 1.99296900  | 2.27263300  | 0.74005000  |
| 6 | 3.05737400  | 2.92163400  | 0.13655400  |
| 6 | 4.19421000  | 2.24854300  | -0.33907100 |
| 6 | 4.25461900  | 0.88004300  | -0.32263400 |
| 1 | 1.20562000  | 2.83651900  | 1.21399200  |
| 1 | 3.04845300  | 4.00107800  | 0.09595900  |
| 1 | 5.02241300  | 2.82846600  | -0.71475000 |
| 1 | 5.12522800  | 0.36533200  | -0.70155500 |
| 1 | 2.99984200  | -0.52060500 | 1.28635500  |
| 6 | 1.37016700  | -1.71364900 | 0.12070100  |
| 1 | 1.94451300  | -2.48416200 | 0.64019200  |
| 6 | 0.67129700  | -0.91501400 | 1.29823100  |
| 1 | 0.48962500  | -1.65793400 | 2.07964900  |
| 8 | -2.45882300 | -1.20004800 | -0.56898300 |
| 6 | -3.04630000 | 0.01444000  | -0.49202100 |
| 6 | -4.24294400 | 0.21408500  | -1.15322500 |
| 1 | -4.68391300 | -0.61135300 | -1.68858600 |
| 6 | -4.84783200 | 1.45641700  | -1.10857700 |
| 1 | -5.78732700 | 1.60749600  | -1.61726100 |
| 6 | -4.26117400 | 2.49881200  | -0.41031300 |
| 1 | -4.73839900 | 3.46512900  | -0.37364300 |
| 6 | -3.05449300 | 2.29599700  | 0.22988400  |
| 1 | -2.57710200 | 3.10719300  | 0.76003700  |
| 6 | -2.42787000 | 1.05795200  | 0.19907400  |
| 6 | -1.11816700 | 0.80215600  | 0.76355200  |
| 1 | -0.51120000 | 1.63730900  | 1.07105400  |
| 6 | -0.67360900 | -0.44706100 | 0.85472600  |
| 6 | -1.63439000 | -1.56917200 | 0.53737100  |
| 6 | -2.51598800 | -1.86740900 | 1.73567900  |
| 1 | -3.11702000 | -0.99846200 | 1.98955100  |
| 1 | -3.17613700 | -2.70287500 | 1.51448800  |
| 1 | -1.90455500 | -2.12247000 | 2.59779500  |
| 6 | -0.87872000 | -2.80837700 | 0.08098600  |
| 1 | -1.56995200 | -3.42495200 | -0.48828800 |
| 1 | -0.56937900 | -3.38709800 | 0.95098200  |
| 6 | 0.31807700  | -2.39837800 | -0.74928300 |
| 1 | -0.05315100 | -1.71500500 | -1.50922000 |
| 1 | 0.75062400  | -3.25166500 | -1.26853100 |
| 6 | 2.39538100  | -0.90334600 | -0.69591400 |
| 6 | 3.43932800  | -1.85620300 | -1.25505800 |
| 1 | 4.13845200  | -1.33062000 | -1.90146100 |
| 1 | 4.00128300  | -2.33960100 | -0.45876500 |
| 1 | 2.96291700  | -2.62903200 | -1.85509000 |
| 6 | 1.75997000  | -0.12349900 | -1.84438900 |
| 1 | 2.47703200  | 0.58637400  | -2.24964100 |
| 1 | 1.45765800  | -0.78700300 | -2.65150200 |
| 1 | 0.88476900  | 0.43062300  | -1.51236200 |

*trans*-5

**E(RMPWB1K) = -1021.238425 a.u.**

|   |             |             |             |
|---|-------------|-------------|-------------|
| 6 | -5.09027400 | 2.20643700  | -0.10420300 |
| 6 | -5.69059900 | 1.02760200  | -0.51198800 |
| 6 | -4.94390100 | -0.12792900 | -0.65327600 |
| 6 | -3.58960800 | -0.09895500 | -0.38458100 |
| 6 | -2.96568600 | 1.07838700  | 0.01887800  |
| 6 | -3.73306700 | 2.22572900  | 0.15460600  |
| 8 | -2.87021100 | -1.21903800 | -0.59422700 |
| 6 | -1.65967800 | -1.42365600 | 0.13324400  |
| 6 | -0.90220400 | -0.13573100 | 0.34332200  |
| 6 | -1.53997800 | 1.02769800  | 0.27006700  |
| 6 | -0.85743500 | -2.35548500 | -0.76454700 |
| 6 | 0.60049200  | -2.49489000 | -0.37073600 |
| 6 | 1.27662100  | -1.13586400 | -0.32097200 |
| 6 | 0.54064400  | -0.30486200 | 0.72382100  |
| 6 | -2.01808400 | -2.06390800 | 1.46396700  |
| 6 | 2.79098900  | -1.13475900 | -0.03495400 |
| 6 | 3.23941400  | 0.30531100  | -0.16322200 |
| 6 | 2.40525600  | 1.28803900  | 0.38426100  |
| 7 | 1.21922800  | 0.92844300  | 0.97429000  |
| 6 | 4.42630300  | 0.70356100  | -0.75175900 |
| 6 | 4.81930300  | 2.03045600  | -0.78044300 |
| 6 | 4.00045800  | 2.98701000  | -0.21174100 |
| 6 | 2.79875500  | 2.62220600  | 0.35839200  |
| 6 | 3.51048300  | -2.04503000 | -1.01482300 |
| 6 | 3.08985900  | -1.60762000 | 1.38826400  |
| 1 | -5.67553400 | 3.10522400  | 0.00667500  |
| 1 | -6.74906200 | 1.00371900  | -0.72000400 |
| 1 | -5.38991300 | -1.05524600 | -0.97479300 |
| 1 | -3.25140600 | 3.14143700  | 0.46539400  |
| 1 | -1.01687500 | 1.96245500  | 0.40816900  |
| 1 | -0.91552200 | -1.93926000 | -1.76903400 |
| 1 | -1.35202000 | -3.32470300 | -0.79197100 |
| 1 | 1.08863700  | -3.13978100 | -1.09614500 |
| 1 | 0.69245700  | -2.98913600 | 0.59827100  |
| 1 | 1.13935400  | -0.65122800 | -1.29131300 |
| 1 | 0.54257000  | -0.91395800 | 1.63955800  |
| 1 | -1.13050600 | -2.32156100 | 2.03558000  |
| 1 | -2.59241800 | -2.96951400 | 1.28703000  |
| 1 | -2.61937100 | -1.37815800 | 2.05571700  |
| 1 | 5.07113300  | -0.03884000 | -1.19427500 |
| 1 | 5.75366200  | 2.30970100  | -1.24024900 |
| 1 | 4.28879800  | 4.02707200  | -0.22110700 |
| 1 | 2.14788800  | 3.37222800  | 0.78491200  |
| 1 | 4.58469700  | -2.01679400 | -0.85316900 |
| 1 | 3.31400400  | -1.75827700 | -2.04635400 |
| 1 | 3.20269200  | -3.07807100 | -0.87851800 |
| 1 | 4.16529900  | -1.65106900 | 1.54101500  |
| 1 | 2.68491600  | -2.60222000 | 1.57105000  |
| 1 | 2.68236900  | -0.92421900 | 2.12907700  |
| 1 | 0.71286500  | 1.64092400  | 1.45882500  |

## 11-B

**E(RB3LYP) = -3917.171684 a.u.**

|    |             |             |             |
|----|-------------|-------------|-------------|
| 8  | -3.82209800 | 0.19688500  | -1.89797900 |
| 6  | -2.66700100 | 0.85844000  | -1.28593000 |
| 6  | -3.24480900 | 1.97540700  | -0.37249900 |
| 6  | -2.31155300 | 3.12048900  | 0.06636900  |
| 6  | -1.92633600 | 1.43844800  | -2.49130900 |
| 6  | 1.03532900  | 2.90848400  | 2.11326900  |
| 6  | 0.41585000  | 4.59530200  | 0.31404300  |
| 1  | -3.67999800 | 1.50277200  | 0.51510600  |
| 1  | -4.07682800 | 2.41404100  | -0.93596500 |
| 1  | -2.95197800 | 3.83341000  | 0.60765100  |
| 1  | -1.96120200 | 3.66744000  | -0.81555000 |
| 1  | -1.06572100 | 2.03753800  | -2.18730000 |
| 1  | -2.60847700 | 2.08442000  | -3.04958500 |
| 1  | -1.59141400 | 0.64041200  | -3.15972000 |
| 1  | 2.02764300  | 2.78704000  | 1.66041700  |
| 1  | 0.76181800  | 1.96055000  | 2.58100900  |
| 1  | 1.15078300  | 3.66183600  | 2.90459500  |
| 1  | 0.52025500  | 5.45537800  | 0.98890100  |
| 1  | -0.30162400 | 4.87302500  | -0.46097200 |
| 1  | 1.39685100  | 4.46139600  | -0.16031000 |
| 6  | -3.94911600 | -1.37675300 | -0.08004700 |
| 6  | -4.71927900 | -2.31614200 | 0.63131300  |
| 1  | -4.25430200 | -2.86142400 | 1.44774000  |
| 6  | -6.04849900 | -2.53743500 | 0.29825400  |
| 1  | -6.64111800 | -3.25261200 | 0.85881500  |
| 6  | -6.61675300 | -1.84071100 | -0.77793100 |
| 1  | -7.65333900 | -2.01904300 | -1.04845100 |
| 6  | -5.87297800 | -0.91625500 | -1.50768500 |
| 1  | -6.30006500 | -0.37570800 | -2.34533100 |
| 6  | -4.54676000 | -0.67010200 | -1.14701800 |
| 6  | -2.53996400 | -1.18539900 | 0.13468700  |
| 1  | -2.00494700 | -1.92127800 | 0.72442800  |
| 6  | -1.86346700 | -0.17472800 | -0.48105900 |
| 6  | 2.53120800  | -1.73571700 | 0.38877300  |
| 1  | 2.03317500  | -2.58323500 | 0.84506400  |
| 6  | 3.88234800  | -1.79704800 | 0.06210100  |
| 1  | 4.45290000  | -2.69677900 | 0.26077900  |
| 6  | 4.49790500  | -0.69090900 | -0.52352300 |
| 6  | 3.78441800  | 0.47735400  | -0.77934100 |
| 1  | 4.28057100  | 1.33670500  | -1.21529100 |
| 6  | 2.42970000  | 0.53362100  | -0.45381300 |
| 6  | 1.79911900  | -0.57452800 | 0.11857100  |
| 6  | -0.42362900 | -0.12457100 | -0.47552100 |
| 1  | 0.04033700  | 0.27950200  | -1.37393700 |
| 6  | -1.16021400 | 2.72791700  | 0.96231100  |
| 1  | -1.34037200 | 1.87376100  | 1.61186700  |
| 6  | 0.01812900  | 3.36366700  | 1.09245300  |
| 7  | 0.39845800  | -0.56054400 | 0.43946900  |
| 1  | 1.87268500  | 1.45104700  | -0.61387000 |
| 5  | 0.01664700  | -1.02018200 | 2.00543600  |
| 9  | -0.22330600 | -2.38688200 | 1.94206700  |
| 9  | 1.12572000  | -0.69356100 | 2.74349800  |
| 9  | -1.09724600 | -0.29720400 | 2.38167600  |
| 35 | 6.35229500  | -0.77470600 | -0.97153400 |



**TS-tf-B-11****E (RB3LYP) = -3917.123859 a.u.**

|    |             |             |             |
|----|-------------|-------------|-------------|
| 8  | -4.33689100 | 1.21530900  | -0.12347700 |
| 6  | -2.95826300 | 1.48409500  | -0.48837800 |
| 6  | -2.57961600 | 2.66128200  | 0.41946900  |
| 6  | -1.09695400 | 3.01914200  | 0.35057200  |
| 6  | -2.94130600 | 1.86734600  | -1.98113900 |
| 6  | 2.00720600  | 1.64344400  | 2.08269600  |
| 6  | 1.80804500  | 3.32863400  | 0.18586400  |
| 1  | -2.84768400 | 2.38609100  | 1.44528900  |
| 1  | -3.19200600 | 3.52742100  | 0.14728500  |
| 1  | -0.91578800 | 3.90875500  | 0.96531900  |
| 1  | -0.82300100 | 3.29878600  | -0.67335400 |
| 1  | -1.93366900 | 2.11334800  | -2.32978600 |
| 1  | -3.58874700 | 2.73286500  | -2.15301900 |
| 1  | -3.30704800 | 1.03208500  | -2.58406200 |
| 1  | 3.07901400  | 1.60945200  | 1.87069300  |
| 1  | 1.65947600  | 0.66558800  | 2.42214500  |
| 1  | 1.86434000  | 2.34530200  | 2.92238400  |
| 1  | 1.59886700  | 4.24802500  | 0.75663800  |
| 1  | 1.38127300  | 3.47779000  | -0.80848100 |
| 1  | 2.89328200  | 3.24028100  | 0.10431800  |
| 6  | -4.03562000 | -1.13450500 | -0.54428200 |
| 6  | -4.62587900 | -2.37759200 | -0.81523800 |
| 1  | -3.98869800 | -3.25497000 | -0.88583800 |
| 6  | -6.00442000 | -2.49211500 | -0.97766200 |
| 6  | -6.81219800 | -1.35696000 | -0.85772100 |
| 1  | -7.88843000 | -1.44088400 | -0.97703400 |
| 6  | -6.24819900 | -0.10904000 | -0.58903800 |
| 1  | -6.85883300 | 0.78204700  | -0.48846700 |
| 6  | -4.86649100 | -0.00310600 | -0.44206700 |
| 6  | -2.61332800 | -0.95858400 | -0.30532400 |
| 1  | -2.00294300 | -1.84462800 | -0.17005200 |
| 6  | -2.07006000 | 0.27067500  | -0.22285900 |
| 6  | 2.34151600  | -1.70995800 | 0.31550400  |
| 1  | 1.90451600  | -2.55483700 | 0.82921300  |
| 6  | 3.68983500  | -1.69069700 | 0.04770100  |
| 1  | 4.31760900  | -2.51908000 | 0.35582700  |
| 6  | 4.26356600  | -0.59709400 | -0.63539900 |
| 6  | 3.47271900  | 0.43325700  | -1.09628300 |
| 1  | 3.90383800  | 1.23406000  | -1.68651900 |
| 6  | 2.09016400  | 0.42509000  | -0.82932100 |
| 6  | 1.49477100  | -0.63016700 | -0.08003300 |
| 6  | -0.58029400 | 0.48662300  | -0.11744000 |
| 1  | -0.24948800 | 0.83884800  | -1.09853600 |
| 6  | -0.20591300 | 1.87093900  | 0.85704400  |
| 1  | -0.55835900 | 1.48745600  | 1.81828700  |
| 6  | 1.21805200  | 2.16553300  | 0.92506400  |
| 7  | 0.18412100  | -0.60738500 | 0.31979000  |
| 1  | 1.48886400  | 1.14294600  | -1.36733600 |
| 5  | -0.22559600 | -1.38797900 | 1.71295200  |
| 9  | -0.54991200 | -2.69328400 | 1.38429900  |
| 9  | 0.88973200  | -1.33978400 | 2.55353400  |
| 9  | -1.26900300 | -0.67518500 | 2.27980100  |
| 1  | -6.44947700 | -3.45965500 | -1.18661700 |
| 35 | 6.14074300  | -0.59231900 | -0.97751000 |

TS-cf-B-11

E(RB3LYP) = -3917.114742 a.u.

|    |             |             |             |
|----|-------------|-------------|-------------|
| 8  | -4.13460700 | -1.01094200 | 0.84772400  |
| 6  | -2.87174000 | -0.32401400 | 1.14117500  |
| 6  | -2.18801200 | -1.30060200 | 2.12305400  |
| 6  | -0.65995500 | -1.24693800 | 2.12008000  |
| 6  | -3.22669300 | 0.99215100  | 1.84625500  |
| 1  | -2.50901200 | -2.31345800 | 1.85399600  |
| 1  | -2.57155100 | -1.10593800 | 3.12939600  |
| 1  | -0.28297700 | -1.92752900 | 2.89231300  |
| 1  | -0.29757800 | -0.24379200 | 2.36926300  |
| 1  | -2.34207900 | 1.46241800  | 2.27384300  |
| 1  | -3.93779000 | 0.75921500  | 2.64550200  |
| 1  | -3.67923400 | 1.70306900  | 1.15443600  |
| 6  | -4.25376400 | -0.02365600 | -1.33275900 |
| 6  | -5.04223800 | 0.36858800  | -2.42314000 |
| 1  | -4.55712600 | 0.78414100  | -3.30262700 |
| 6  | -6.42752000 | 0.22863200  | -2.38353200 |
| 1  | -7.03089900 | 0.54146700  | -3.22968600 |
| 6  | -7.03547900 | -0.32410700 | -1.25151500 |
| 1  | -8.11491900 | -0.43937900 | -1.21782900 |
| 6  | -6.26983700 | -0.72319300 | -0.15537500 |
| 1  | -6.72461100 | -1.15440800 | 0.73014000  |
| 6  | -4.88563500 | -0.56007000 | -0.19500900 |
| 6  | -2.80236100 | 0.00147100  | -1.31959400 |
| 1  | -2.28918200 | 0.14158800  | -2.26893700 |
| 6  | -2.09474800 | -0.14311400 | -0.18211000 |
| 6  | -0.59064500 | -0.22770300 | -0.31713200 |
| 6  | -0.14957500 | -1.68044600 | 0.74122300  |
| 7  | 0.24132800  | 0.83834400  | -0.00317400 |
| 5  | -0.26640700 | 2.26514000  | 0.63236800  |
| 9  | 0.60943700  | 3.23528800  | 0.18486400  |
| 9  | -1.53993900 | 2.49087300  | 0.16100200  |
| 9  | -0.21456700 | 2.13228800  | 2.02685800  |
| 6  | 1.46251600  | -3.24905800 | -0.39234300 |
| 1  | 1.30978400  | -4.21383200 | 0.11487700  |
| 1  | 0.77738900  | -3.22785600 | -1.24497200 |
| 1  | 2.49371400  | -3.23853000 | -0.75364200 |
| 6  | 2.23960100  | -1.90388300 | 1.62642300  |
| 1  | 3.23090500  | -1.78018000 | 1.17881200  |
| 1  | 2.02241200  | -1.04520600 | 2.26072400  |
| 1  | 2.29602200  | -2.79480600 | 2.27209700  |
| 1  | -0.36182300 | -0.67964500 | -1.28221700 |
| 1  | -0.84276400 | -2.36515300 | 0.24421200  |
| 6  | 1.59291700  | 0.66456300  | -0.24365700 |
| 6  | 2.55308900  | 1.41633600  | 0.49611200  |
| 6  | 2.08773700  | -0.31901900 | -1.13400000 |
| 6  | 3.90362700  | 1.18836700  | 0.34499600  |
| 1  | 2.21307900  | 2.15664400  | 1.20463600  |
| 6  | 3.46460400  | -0.52061500 | -1.31398200 |
| 1  | 1.41779200  | -0.83404800 | -1.80971700 |
| 6  | 4.36132600  | 0.21362400  | -0.56194400 |
| 1  | 4.61843800  | 1.75306100  | 0.93273400  |
| 1  | 3.81759500  | -1.24898200 | -2.03535500 |
| 6  | 1.18769300  | -2.14308600 | 0.58899500  |
| 35 | 6.23543300  | -0.08076800 | -0.75203600 |

*trans*-11-B

**E(RB3LYP) = -3917.166969 a.u.**

|    |             |             |             |
|----|-------------|-------------|-------------|
| 6  | 5.60180100  | -2.45969300 | -1.68225300 |
| 6  | 6.43293700  | -1.33873700 | -1.75232400 |
| 6  | 5.96661300  | -0.08478800 | -1.35381900 |
| 6  | 4.65997100  | 0.04313100  | -0.88571400 |
| 6  | 3.80293600  | -1.07032400 | -0.81889900 |
| 6  | 4.29421000  | -2.31940800 | -1.22008400 |
| 8  | 4.21407700  | 1.29500100  | -0.56454800 |
| 6  | 3.07786400  | 1.45569100  | 0.32885700  |
| 6  | 2.06770900  | 0.32207500  | 0.16642200  |
| 6  | 2.43890900  | -0.85532500 | -0.35538300 |
| 6  | 2.48282600  | 2.81692900  | -0.10603400 |
| 6  | 1.02959900  | 3.06513300  | 0.33264600  |
| 6  | 0.14979900  | 1.87475400  | -0.08681900 |
| 6  | 0.68439600  | 0.65508400  | 0.69624900  |
| 6  | 3.61895700  | 1.49105700  | 1.76948700  |
| 6  | -1.38890100 | 2.02252700  | 0.01563800  |
| 6  | -1.92655800 | 0.67351500  | -0.58466100 |
| 6  | -1.37377600 | -0.52761500 | 0.17001300  |
| 7  | -0.20933800 | -0.51208500 | 0.75321600  |
| 6  | -3.41806100 | 0.62283100  | -0.80349600 |
| 6  | -4.12553200 | -0.49319900 | -0.58621000 |
| 6  | -3.49586100 | -1.70790800 | -0.10399600 |
| 6  | -2.19176800 | -1.73052000 | 0.24854900  |
| 6  | -1.85611700 | 3.20791600  | -0.84874600 |
| 6  | -1.88915000 | 2.21091100  | 1.46110600  |
| 1  | 5.96971500  | -3.43414700 | -1.98743900 |
| 1  | 7.45240900  | -1.43831400 | -2.11342400 |
| 1  | 6.59632200  | 0.79751100  | -1.40120800 |
| 1  | 3.63597000  | -3.18239200 | -1.16351300 |
| 1  | 1.74656000  | -1.69015200 | -0.39464100 |
| 1  | 2.52429500  | 2.83522600  | -1.20047400 |
| 1  | 3.13588600  | 3.62141300  | 0.24845700  |
| 1  | 0.68614300  | 3.99321300  | -0.13373500 |
| 1  | 0.96648800  | 3.21730800  | 1.41756900  |
| 1  | 0.35815300  | 1.69598000  | -1.15205200 |
| 1  | 0.80288300  | 0.94991000  | 1.74636900  |
| 1  | 2.83205700  | 1.72172900  | 2.49331900  |
| 1  | 4.39728300  | 2.25623000  | 1.84704800  |
| 1  | 4.04427100  | 0.52113600  | 2.03859500  |
| 1  | -3.89099600 | 1.49948700  | -1.22733100 |
| 1  | -4.09805700 | -2.60644000 | -0.02559700 |
| 1  | -1.73115700 | -2.63617800 | 0.61661700  |
| 1  | -2.94181700 | 3.33154300  | -0.81891300 |
| 1  | -1.55330600 | 3.09103800  | -1.89564700 |
| 1  | -1.42770500 | 4.14317100  | -0.48012900 |
| 1  | -2.98189400 | 2.27587000  | 1.48153900  |
| 1  | -1.49663000 | 3.13935700  | 1.88687600  |
| 1  | -1.59775600 | 1.38812700  | 2.12007200  |
| 5  | 0.18542500  | -1.67515000 | 1.90799600  |
| 9  | -0.91614700 | -1.72964900 | 2.73717300  |
| 9  | 1.30348400  | -1.19972900 | 2.54587500  |
| 9  | 0.39270500  | -2.85649500 | 1.21337000  |
| 1  | -1.49839700 | 0.61147800  | -1.60269000 |
| 35 | -5.99949400 | -0.56209000 | -0.94476300 |

*cis-11-B***E(RB3LYP) = -3917.158362 a.u.**

|    |             |             |             |
|----|-------------|-------------|-------------|
| 8  | 4.16785600  | 1.19632400  | 0.69248200  |
| 6  | 2.81750300  | 0.74166100  | 1.01811000  |
| 6  | 2.14790400  | 2.01640100  | 1.55991200  |
| 6  | 0.62086700  | 1.94098000  | 1.56824400  |
| 6  | 2.94570100  | -0.32990800 | 2.10988400  |
| 1  | 2.46367800  | 2.84943400  | 0.92118800  |
| 1  | 2.53201800  | 2.22042900  | 2.56465600  |
| 1  | 0.23099500  | 2.87644900  | 1.97886600  |
| 1  | 0.27448200  | 1.13859900  | 2.23059100  |
| 1  | 1.97186400  | -0.64658600 | 2.48783200  |
| 1  | 3.53401700  | 0.08409000  | 2.93493400  |
| 1  | 3.44347500  | -1.21871500 | 1.72073400  |
| 6  | 4.29567800  | -0.26857500 | -1.20909100 |
| 6  | 5.10045500  | -0.94239900 | -2.13722200 |
| 1  | 4.62353800  | -1.51685300 | -2.92730400 |
| 6  | 6.48989000  | -0.88178900 | -2.05257500 |
| 1  | 7.10333400  | -1.41258100 | -2.77362000 |
| 6  | 7.08777300  | -0.12885600 | -1.03746900 |
| 1  | 8.17028400  | -0.07407900 | -0.96785300 |
| 6  | 6.30628700  | 0.55102200  | -0.10251200 |
| 1  | 6.75267900  | 1.14112200  | 0.69089700  |
| 6  | 4.91656300  | 0.47197500  | -0.18541100 |
| 6  | 2.84415900  | -0.23378300 | -1.26421200 |
| 1  | 2.36019300  | -0.61524300 | -2.16113200 |
| 6  | 2.10697700  | 0.23649900  | -0.24424200 |
| 6  | 0.59795300  | 0.34417700  | -0.39092900 |
| 6  | 0.09492700  | 1.72493900  | 0.13691200  |
| 7  | -0.23127000 | -0.74970900 | 0.19768200  |
| 6  | -1.64941600 | 3.10314100  | -1.07590400 |
| 1  | -1.19479400 | 4.01679300  | -0.67962700 |
| 1  | -1.17734000 | 2.89080200  | -2.04181600 |
| 1  | -2.70758200 | 3.31884800  | -1.25215500 |
| 6  | -2.21998300 | 2.26288100  | 1.21594600  |
| 1  | -3.28848300 | 2.35862600  | 1.00455000  |
| 1  | -2.09842300 | 1.48670400  | 1.97595700  |
| 1  | -1.88773300 | 3.21056500  | 1.64669200  |
| 1  | 0.40437700  | 0.31063700  | -1.47342600 |
| 1  | 0.61074100  | 2.45724700  | -0.49621300 |
| 6  | -1.52540200 | -0.57961400 | 0.07711800  |
| 6  | -2.48303700 | -1.47454400 | 0.69867800  |
| 6  | -2.03162800 | 0.60676200  | -0.70786900 |
| 6  | -3.81071700 | -1.31864600 | 0.48086900  |
| 1  | -2.12185200 | -2.25444800 | 1.35143300  |
| 6  | -3.51222900 | 0.64097700  | -0.93272300 |
| 1  | -1.56731800 | 0.53426800  | -1.70595100 |
| 6  | -4.32374000 | -0.27170100 | -0.37841000 |
| 1  | -4.52009400 | -1.98473400 | 0.95966200  |
| 1  | -3.90913900 | 1.42869300  | -1.56203200 |
| 6  | -1.44795400 | 1.94459500  | -0.08021600 |
| 5  | 0.33122400  | -2.21825100 | 0.81090400  |
| 9  | 1.64677400  | -2.34905500 | 0.46415700  |
| 9  | 0.11440800  | -2.13091400 | 2.17803800  |
| 9  | -0.45498700 | -3.18183400 | 0.21039600  |
| 35 | -6.20999800 | -0.22321100 | -0.67084800 |

## 12-B

 $E(\text{RB3LYP}) = -1550.568076 \text{ a.u.}$ 

|   |             |             |             |
|---|-------------|-------------|-------------|
| 8 | -3.53537000 | 0.33181000  | -1.82953800 |
| 6 | -2.34709200 | 0.94181300  | -1.22765500 |
| 6 | -2.87034300 | 2.03474700  | -0.25457200 |
| 6 | -1.89411600 | 3.13485900  | 0.20509500  |
| 6 | -1.62718400 | 1.55100300  | -2.43096700 |
| 6 | 1.49926700  | 2.74687400  | 2.14593700  |
| 6 | 0.89107400  | 4.50926700  | 0.41683700  |
| 1 | -3.29515300 | 1.53710500  | 0.62430800  |
| 1 | -3.70439800 | 2.51839600  | -0.77666000 |
| 1 | -2.49916000 | 3.83971800  | 0.79528000  |
| 1 | -1.55373200 | 3.71078300  | -0.66191700 |
| 1 | -0.74539300 | 2.11964900  | -2.12919800 |
| 1 | -2.30962500 | 2.23258300  | -2.94454700 |
| 1 | -1.32915400 | 0.77244100  | -3.13863300 |
| 1 | 2.47390400  | 2.59971100  | 1.66318900  |
| 1 | 1.20077700  | 1.79925900  | 2.59898000  |
| 1 | 1.66522800  | 3.47517100  | 2.95139400  |
| 1 | 1.03022400  | 5.34595900  | 1.11436900  |
| 1 | 0.16921300  | 4.82937400  | -0.33749200 |
| 1 | 1.86014000  | 4.36297300  | -0.07776200 |
| 6 | -3.64994900 | -1.30631400 | -0.06816500 |
| 6 | -4.42250800 | -2.25628700 | 0.62814500  |
| 1 | -3.94874100 | -2.84181400 | 1.41088800  |
| 6 | -5.76386000 | -2.43561100 | 0.32274600  |
| 1 | -6.35830400 | -3.15831800 | 0.87141200  |
| 6 | -6.34354200 | -1.68601800 | -0.71179600 |
| 1 | -7.39048100 | -1.83179800 | -0.96096200 |
| 6 | -5.59899800 | -0.75116200 | -1.42676200 |
| 1 | -6.03565100 | -0.17078000 | -2.23211800 |
| 6 | -4.25872200 | -0.54646400 | -1.09238400 |
| 6 | -2.23319500 | -1.15650000 | 0.11483600  |
| 1 | -1.70170600 | -1.92703700 | 0.66207100  |
| 6 | -1.54727700 | -0.14041700 | -0.48582600 |
| 6 | 2.81313900  | -1.87276500 | 0.16452100  |
| 1 | 2.29915800  | -2.72354000 | 0.59539800  |
| 6 | 4.14780600  | -1.95950300 | -0.20898500 |
| 1 | 4.71194700  | -2.87487600 | -0.08424000 |
| 6 | 4.76986500  | -0.83964800 | -0.76008200 |
| 6 | 4.09528300  | 0.36542800  | -0.93802400 |
| 1 | 4.62274700  | 1.21603300  | -1.35025700 |
| 6 | 2.75780700  | 0.44609000  | -0.56470500 |
| 6 | 2.11258100  | -0.67388900 | -0.02555300 |
| 6 | -0.11039700 | -0.12432500 | -0.52086800 |
| 1 | 0.33677400  | 0.32004600  | -1.40848900 |
| 6 | -0.72988000 | 2.67432400  | 1.05023200  |
| 1 | -0.91965500 | 1.80607500  | 1.67805100  |
| 6 | 0.47253800  | 3.26670200  | 1.16629200  |
| 7 | 0.72799300  | -0.63435800 | 0.34309800  |
| 1 | 2.22268100  | 1.38481900  | -0.65844200 |
| 5 | 0.38659600  | -1.15594800 | 1.90347700  |
| 9 | 0.08946400  | -2.50662200 | 1.78664700  |
| 9 | 1.53766600  | -0.90733500 | 2.60577300  |
| 9 | -0.67997500 | -0.40515200 | 2.35110600  |

|   |            |             |             |
|---|------------|-------------|-------------|
| 7 | 6.18198900 | -0.92948000 | -1.15919800 |
| 8 | 6.70374900 | 0.07538300  | -1.64295200 |
| 8 | 6.75628800 | -2.00426300 | -0.98886300 |

TS-tf-B-12

E(RB3LYP) = -1550.521669 a.u.

|   |             |             |             |
|---|-------------|-------------|-------------|
| 8 | -3.98589400 | 1.27593300  | 0.02397600  |
| 6 | -2.61741400 | 1.53459400  | -0.38065300 |
| 6 | -2.17558500 | 2.65445600  | 0.57044500  |
| 6 | -0.68581600 | 2.97346500  | 0.46729300  |
| 6 | -2.64697500 | 1.99437000  | -1.85129700 |
| 6 | 2.42178300  | 1.42892500  | 2.02408800  |
| 6 | 2.21419600  | 3.23219300  | 0.24036800  |
| 1 | -2.41721400 | 2.33500900  | 1.58992900  |
| 1 | -2.76999100 | 3.55052700  | 0.36370000  |
| 1 | -0.45435300 | 3.81710800  | 1.12766900  |
| 1 | -0.43950000 | 3.30554400  | -0.54785200 |
| 1 | -1.64815600 | 2.24142200  | -2.22394100 |
| 1 | -3.28372300 | 2.87848300  | -1.95418100 |
| 1 | -3.04990800 | 1.19821100  | -2.48266100 |
| 1 | 3.49314800  | 1.41775400  | 1.81076700  |
| 1 | 2.07634600  | 0.43001600  | 2.29969900  |
| 1 | 2.27179100  | 2.07109900  | 2.90917100  |
| 1 | 2.01032900  | 4.11107100  | 0.87335500  |
| 1 | 1.77618200  | 3.44663700  | -0.73671300 |
| 1 | 3.29812700  | 3.14852400  | 0.14444900  |
| 6 | -3.75444000 | -1.05295500 | -0.53675300 |
| 6 | -4.38229200 | -2.26645700 | -0.85421200 |
| 1 | -3.76853100 | -3.15166500 | -0.99711900 |
| 6 | -5.76779300 | -2.34248300 | -0.97158700 |
| 1 | -6.24228600 | -3.28702600 | -1.21744200 |
| 6 | -6.54445500 | -1.19908300 | -0.75858600 |
| 1 | -7.62585300 | -1.25368700 | -0.84239300 |
| 6 | -5.94297800 | 0.01967400  | -0.44194600 |
| 1 | -6.52912600 | 0.91614600  | -0.26962500 |
| 6 | -4.55491500 | 0.08821700  | -0.34130900 |
| 6 | -2.32119400 | -0.92105500 | -0.33955900 |
| 1 | -1.72816600 | -1.82640600 | -0.27246700 |
| 6 | -1.74826300 | 0.29054400  | -0.21132600 |
| 6 | 2.62361300  | -1.82769800 | 0.05640000  |
| 1 | 2.17552900  | -2.69779100 | 0.51504200  |
| 6 | 3.96248700  | -1.81177000 | -0.23764100 |
| 1 | 4.59647000  | -2.66056900 | -0.01479000 |
| 6 | 4.53543400  | -0.67180800 | -0.84506700 |
| 6 | 3.75932500  | 0.40493800  | -1.22006300 |
| 1 | 4.21604600  | 1.22808900  | -1.75572600 |
| 6 | 2.38624000  | 0.40148600  | -0.92855600 |
| 6 | 1.78930300  | -0.70115500 | -0.23713400 |
| 6 | -0.25108700 | 0.47606400  | -0.14257100 |
| 1 | 0.04991000  | 0.85575400  | -1.12387100 |
| 6 | 0.18365800  | 1.76612400  | 0.86871200  |
| 1 | -0.13642000 | 1.35476400  | 1.83070100  |
| 6 | 1.62604600  | 2.02927800  | 0.91197300  |
| 7 | 0.50355900  | -0.67061900 | 0.20650900  |
| 1 | 1.78213700  | 1.14868600  | -1.42130000 |
| 5 | 0.11854000  | -1.52627600 | 1.57002500  |
| 9 | -0.25703300 | -2.79712600 | 1.17648500  |
| 9 | 1.26720700  | -1.55620800 | 2.36354500  |
| 9 | -0.87853500 | -0.81336600 | 2.21207600  |

|   |            |             |             |
|---|------------|-------------|-------------|
| 7 | 5.96820100 | -0.65548400 | -1.13603600 |
| 8 | 6.43930600 | 0.35896100  | -1.65686100 |
| 8 | 6.62335900 | -1.65520600 | -0.83747600 |



TS-cf-B-12

E(RB3LYP) = -1550.510878 a.u.

|   |             |             |             |
|---|-------------|-------------|-------------|
| 8 | -3.79829400 | -0.94168900 | 0.93659300  |
| 6 | -2.52911100 | -0.24553200 | 1.17274600  |
| 6 | -1.83921500 | -1.16141600 | 2.20717000  |
| 6 | -0.31177300 | -1.11922100 | 2.17644000  |
| 6 | -2.87241800 | 1.11309300  | 1.79950700  |
| 1 | -2.17194400 | -2.18722600 | 2.01175900  |
| 1 | -2.20421600 | -0.89710200 | 3.20431600  |
| 1 | 0.07452000  | -1.75387900 | 2.98223000  |
| 1 | 0.06079200  | -0.10520900 | 2.35629500  |
| 1 | -1.98208400 | 1.60512100  | 2.18822800  |
| 1 | -3.57557100 | 0.93134200  | 2.61867700  |
| 1 | -3.33078400 | 1.78167700  | 1.07035700  |
| 6 | -3.93542300 | -0.08738900 | -1.29847700 |
| 6 | -4.73317600 | 0.24468500  | -2.40236300 |
| 1 | -4.25517400 | 0.60261800  | -3.31054800 |
| 6 | -6.11855300 | 0.11827800  | -2.33895900 |
| 1 | -6.72944600 | 0.38412700  | -3.19561800 |
| 6 | -6.71748300 | -0.36053000 | -1.16880000 |
| 1 | -7.79722500 | -0.46500400 | -1.11661400 |
| 6 | -5.94277500 | -0.69896400 | -0.05886400 |
| 1 | -6.39072200 | -1.07221000 | 0.85590900  |
| 6 | -4.55812900 | -0.54906500 | -0.12339300 |
| 6 | -2.48426900 | -0.07402800 | -1.30364700 |
| 1 | -1.98181600 | 0.00256600  | -2.26588800 |
| 6 | -1.76460300 | -0.15177900 | -0.16647900 |
| 6 | -0.26311500 | -0.25432900 | -0.31777400 |
| 6 | 0.17138000  | -1.64258500 | 0.81722300  |
| 7 | 0.58454100  | 0.82596100  | -0.08282000 |
| 5 | 0.08510400  | 2.28862700  | 0.49182700  |
| 9 | 0.95187400  | 3.23511700  | -0.01618700 |
| 9 | -1.19348100 | 2.48850400  | 0.02612100  |
| 9 | 0.15747400  | 2.21716800  | 1.88804000  |
| 6 | 1.75338900  | -3.31091600 | -0.21669900 |
| 1 | 1.59666800  | -4.23171500 | 0.36582700  |
| 1 | 1.05699000  | -3.34856800 | -1.05935100 |
| 1 | 2.78027900  | -3.33991300 | -0.58774100 |
| 6 | 2.56378200  | -1.81809900 | 1.68563000  |
| 1 | 3.56189500  | -1.82257900 | 1.23945700  |
| 1 | 2.39670000  | -0.87037200 | 2.19625300  |
| 1 | 2.55620800  | -2.61238200 | 2.44962300  |
| 1 | -0.05587300 | -0.75846500 | -1.26089100 |
| 1 | -0.53527900 | -2.34940500 | 0.37306800  |
| 6 | 1.92414100  | 0.63700900  | -0.35800300 |
| 6 | 2.91172900  | 1.44616800  | 0.28411900  |
| 6 | 2.38617000  | -0.41933000 | -1.18753600 |
| 6 | 4.25434900  | 1.20593000  | 0.10215300  |
| 1 | 2.59577400  | 2.24409700  | 0.93800000  |
| 6 | 3.75101000  | -0.63892400 | -1.39669500 |
| 1 | 1.69298900  | -0.98450300 | -1.79520200 |
| 6 | 4.66965500  | 0.15534600  | -0.73552700 |
| 1 | 5.00248900  | 1.80488900  | 0.60590700  |
| 1 | 4.09965000  | -1.41812300 | -2.06317600 |
| 6 | 1.50011200  | -2.13566800 | 0.68359300  |

|   |            |             |             |
|---|------------|-------------|-------------|
| 7 | 6.10123400 | -0.09609400 | -0.92394200 |
| 8 | 6.42753000 | -1.04678900 | -1.63778000 |
| 8 | 6.89231200 | 0.65404200  | -0.35214300 |

*trans*-12-B

**E (RB3LYP) = -1550.561402 a.u.**

|   |             |             |             |
|---|-------------|-------------|-------------|
| 6 | 5.39435300  | -2.30891700 | -1.65524100 |
| 6 | 6.19993500  | -1.16722900 | -1.65953900 |
| 6 | 5.69149500  | 0.06084900  | -1.23303200 |
| 6 | 4.36824300  | 0.14169300  | -0.80299300 |
| 6 | 3.53678500  | -0.99297600 | -0.80234200 |
| 6 | 4.07000600  | -2.21556100 | -1.23088700 |
| 8 | 3.88147300  | 1.37091800  | -0.45341100 |
| 6 | 2.71862800  | 1.47154700  | 0.41292000  |
| 6 | 1.74012300  | 0.32274200  | 0.17727100  |
| 6 | 2.15443400  | -0.82612100 | -0.37496700 |
| 6 | 2.10430200  | 2.83537300  | 0.01415900  |
| 6 | 0.63415500  | 3.03356800  | 0.41967900  |
| 6 | -0.20519600 | 1.84256100  | -0.07464800 |
| 6 | 0.33402200  | 0.60485500  | 0.67593900  |
| 6 | 3.21744900  | 1.46127400  | 1.86911000  |
| 6 | -1.74897300 | 1.95502100  | -0.01066600 |
| 6 | -2.23877400 | 0.61655600  | -0.67421600 |
| 6 | -1.67752700 | -0.60524300 | 0.04471400  |
| 7 | -0.53271900 | -0.58397800 | 0.66122900  |
| 6 | -3.71452400 | 0.53959100  | -0.93245900 |
| 6 | -4.39301700 | -0.60627300 | -0.78074200 |
| 6 | -3.76181000 | -1.83124800 | -0.33707700 |
| 6 | -2.46851300 | -1.83201200 | 0.05012100  |
| 6 | -2.22067000 | 3.15951600  | -0.84544100 |
| 6 | -2.29286000 | 2.07686700  | 1.42635400  |
| 1 | 5.79523000  | -3.26307100 | -1.98212400 |
| 1 | 7.23227500  | -1.23063200 | -1.99087700 |
| 1 | 6.30094700  | 0.95845000  | -1.22938900 |
| 1 | 3.43147000  | -3.09503100 | -1.22551600 |
| 1 | 1.48385500  | -1.67450000 | -0.46786800 |
| 1 | 2.17636200  | 2.89818700  | -1.07702700 |
| 1 | 2.72755000  | 3.63954100  | 0.41903200  |
| 1 | 0.28268200  | 3.97269500  | -0.01764700 |
| 1 | 0.53677000  | 3.13792000  | 1.50774100  |
| 1 | 0.03834700  | 1.71190700  | -1.13956400 |
| 1 | 0.41309200  | 0.86012600  | 1.73996100  |
| 1 | 2.40417500  | 1.64063200  | 2.57813700  |
| 1 | 3.97215400  | 2.24238800  | 2.00135600  |
| 1 | 3.66124800  | 0.49238200  | 2.11064400  |
| 1 | -4.22690900 | 1.40915700  | -1.32344200 |
| 1 | -4.35662300 | -2.73571000 | -0.31913200 |
| 1 | -1.99179100 | -2.73912700 | 0.39304400  |
| 1 | -3.30944300 | 3.25792300  | -0.84453800 |
| 1 | -1.88405700 | 3.08936900  | -1.88610300 |
| 1 | -1.82616200 | 4.08976700  | -0.42980500 |
| 1 | -3.38649800 | 2.13182200  | 1.41939300  |
| 1 | -1.92271400 | 2.99113800  | 1.89934700  |
| 1 | -2.00988300 | 1.23145800  | 2.05979300  |
| 5 | -0.14640000 | -1.78285600 | 1.79327600  |
| 9 | -1.27523500 | -1.88330200 | 2.57853700  |
| 9 | 0.93767100  | -1.30166000 | 2.48053200  |
| 9 | 0.10831800  | -2.93151200 | 1.06406900  |
| 1 | -1.79397900 | 0.61064500  | -1.68727500 |

|   |             |             |             |
|---|-------------|-------------|-------------|
| 7 | -5.83023900 | -0.63834500 | -1.11386000 |
| 8 | -6.40571800 | -1.71795800 | -0.99128900 |
| 8 | -6.35882600 | 0.40613500  | -1.48910700 |

*cis*-12-B**E (RB3LYP) = -1550.552497 a.u.**

|   |             |             |             |
|---|-------------|-------------|-------------|
| 8 | -3.78199700 | -1.12249400 | 0.90745700  |
| 6 | -2.42641700 | -0.61834100 | 1.11618200  |
| 6 | -1.71174200 | -1.81462000 | 1.76997500  |
| 6 | -0.18614900 | -1.74308200 | 1.67683900  |
| 6 | -2.52308000 | 0.57127300  | 2.08200800  |
| 1 | -2.05907700 | -2.72045600 | 1.25998000  |
| 1 | -2.03188900 | -1.89365900 | 2.81390900  |
| 1 | 0.22874200  | -2.62837900 | 2.16517100  |
| 1 | 0.19843200  | -0.87372800 | 2.22357100  |
| 1 | -1.53885200 | 0.93003300  | 2.38930200  |
| 1 | -3.08021400 | 0.25283500  | 2.96879100  |
| 1 | -3.03903300 | 1.40965300  | 1.61246700  |
| 6 | -4.02135600 | 0.12025800  | -1.13689800 |
| 6 | -4.87867800 | 0.67859200  | -2.09438900 |
| 1 | -4.44808600 | 1.16721200  | -2.96471000 |
| 6 | -6.26137800 | 0.61264800  | -1.93742400 |
| 1 | -6.91590300 | 1.05377600  | -2.68232000 |
| 6 | -6.79955700 | -0.03018500 | -0.81848900 |
| 1 | -7.87665000 | -0.08882100 | -0.69194200 |
| 6 | -5.96513800 | -0.59400500 | 0.14743200  |
| 1 | -6.36508900 | -1.09717900 | 1.02136600  |
| 6 | -4.58221200 | -0.50886700 | -0.00944900 |
| 6 | -2.57385500 | 0.09613500  | -1.25721900 |
| 1 | -2.13764900 | 0.38269700  | -2.21206900 |
| 6 | -1.78403900 | -0.25155200 | -0.22780900 |
| 6 | -0.28230900 | -0.36095000 | -0.42696800 |
| 6 | 0.24400000  | -1.69072800 | 0.19832300  |
| 7 | 0.55025800  | 0.77915200  | 0.06429000  |
| 6 | 1.86998400  | -3.08884300 | -1.14842100 |
| 1 | 1.45569500  | -4.01291000 | -0.73315400 |
| 1 | 1.30823200  | -2.85423400 | -2.05941800 |
| 1 | 2.90641500  | -3.29798600 | -1.43120500 |
| 6 | 2.58915000  | -2.33314700 | 1.13357500  |
| 1 | 3.63466100  | -2.50513400 | 0.86170000  |
| 1 | 2.56585600  | -1.55530400 | 1.90155600  |
| 1 | 2.21755900  | -3.25881500 | 1.58003100  |
| 1 | -0.12159500 | -0.40507500 | -1.51508300 |
| 1 | -0.32105400 | -2.47793100 | -0.31484000 |
| 6 | 1.84317300  | 0.60162900  | -0.02648900 |
| 6 | 2.79154000  | 1.54468200  | 0.54154700  |
| 6 | 2.35725000  | -0.62432300 | -0.74644600 |
| 6 | 4.12153800  | 1.38843800  | 0.34733100  |
| 1 | 2.41413100  | 2.35739500  | 1.14369400  |
| 6 | 3.83470900  | -0.66937100 | -0.94306200 |
| 1 | 1.91680500  | -0.57843800 | -1.75735600 |
| 6 | 4.63021000  | 0.28506100  | -0.43548300 |
| 1 | 4.83632000  | 2.07803200  | 0.77845700  |
| 1 | 4.27037400  | -1.48583900 | -1.50608800 |
| 6 | 1.76307000  | -1.95412900 | -0.11093400 |
| 5 | -0.00659500 | 2.32858800  | 0.47781700  |
| 9 | -1.31989700 | 2.41108800  | 0.11494200  |
| 9 | 0.21384600  | 2.42793900  | 1.84272900  |
| 9 | 0.79064600  | 3.18490100  | -0.25253800 |

|   |            |             |             |
|---|------------|-------------|-------------|
| 7 | 6.08733600 | 0.19778700  | -0.65822900 |
| 8 | 6.78100600 | 1.08508900  | -0.16548300 |
| 8 | 6.51325000 | -0.74935000 | -1.31596400 |

## 13-B

**E(RB3LYP) = -1460.594675 a.u.**

|   |             |             |             |
|---|-------------|-------------|-------------|
| 8 | -3.43097100 | 0.29198000  | -1.76591600 |
| 6 | -2.22866600 | 0.91202900  | -1.20325000 |
| 6 | -2.72957400 | 2.00027300  | -0.21224100 |
| 6 | -1.75590000 | 3.11991800  | 0.20443000  |
| 6 | -1.55596500 | 1.52871700  | -2.42974100 |
| 6 | 1.72663600  | 2.78784000  | 1.99365800  |
| 6 | 1.01114600  | 4.54136700  | 0.29798800  |
| 1 | -3.10940500 | 1.49792400  | 0.68437500  |
| 1 | -3.59241100 | 2.46758000  | -0.70162400 |
| 1 | -2.35012500 | 3.81665900  | 0.81521200  |
| 1 | -1.46039900 | 3.69725500  | -0.67824200 |
| 1 | -0.66617400 | 2.09967900  | -2.15754100 |
| 1 | -2.25984200 | 2.20792500  | -2.91718900 |
| 1 | -1.27930100 | 0.75309100  | -3.14922400 |
| 1 | 2.67409900  | 2.64456100  | 1.45855000  |
| 1 | 1.46219000  | 1.83929400  | 2.46525700  |
| 1 | 1.92919400  | 3.52193300  | 2.78567600  |
| 1 | 1.18683100  | 5.37716500  | 0.98849100  |
| 1 | 0.24314800  | 4.85851200  | -0.41063700 |
| 1 | 1.94949900  | 4.40172900  | -0.25459700 |
| 6 | -3.47035800 | -1.34810500 | -0.00419000 |
| 6 | -4.21100600 | -2.29936600 | 0.72122800  |
| 1 | -3.70470200 | -2.88369400 | 1.48438100  |
| 6 | -5.56403700 | -2.48466700 | 0.46925800  |
| 1 | -6.13222000 | -3.21055200 | 1.04140600  |
| 6 | -6.18813500 | -1.73749000 | -0.53933000 |
| 1 | -7.24378700 | -1.88651500 | -0.74659000 |
| 6 | -5.47473400 | -0.79862900 | -1.28150500 |
| 1 | -5.94477800 | -0.21782400 | -2.06771200 |
| 6 | -4.12283800 | -0.59103800 | -1.00147900 |
| 6 | -2.04544900 | -1.18736400 | 0.12495000  |
| 1 | -1.48650700 | -1.95337000 | 0.65079500  |
| 6 | -1.39307200 | -0.16347600 | -0.49190400 |
| 6 | 3.04152800  | -1.79285200 | 0.06187100  |
| 1 | 2.57007600  | -2.64349100 | 0.54012800  |
| 6 | 4.36970100  | -1.86608500 | -0.35348400 |
| 1 | 4.92177000  | -2.78305000 | -0.18846600 |
| 6 | 4.97112200  | -0.76227200 | -0.97225900 |
| 6 | 4.22932000  | 0.41248900  | -1.16375900 |
| 1 | 4.71691900  | 1.26590600  | -1.62238700 |
| 6 | 2.90513200  | 0.47824800  | -0.75226500 |
| 6 | 2.29875600  | -0.62979000 | -0.14635900 |
| 6 | 0.04732400  | -0.13558700 | -0.58019200 |
| 1 | 0.45759700  | 0.28368200  | -1.49741700 |
| 6 | -0.55084900 | 2.68280000  | 1.00349500  |
| 1 | -0.69900000 | 1.80996100  | 1.63582900  |
| 6 | 0.64572800  | 3.29369700  | 1.06659400  |
| 7 | 0.92074500  | -0.60842200 | 0.26456000  |
| 1 | 2.34872100  | 1.40291000  | -0.86835400 |
| 5 | 0.62700000  | -1.10911600 | 1.83371800  |
| 9 | 0.36140100  | -2.47085000 | 1.74556900  |
| 9 | 1.77960300  | -0.82272100 | 2.52085600  |
| 9 | -0.45182900 | -0.38404000 | 2.30157100  |

|   |            |             |             |
|---|------------|-------------|-------------|
| 8 | 6.26020200 | -0.72584200 | -1.41234700 |
| 6 | 7.07046100 | -1.87674300 | -1.22065900 |
| 1 | 8.04906800 | -1.62625500 | -1.63194000 |
| 1 | 7.17748200 | -2.12273700 | -0.15692600 |
| 1 | 6.66779000 | -2.74782100 | -1.75274800 |



TS-tf-B-13

E(RB3LYP) = -1460.547062 a.u.

|   |             |             |             |
|---|-------------|-------------|-------------|
| 8 | -3.76703700 | 1.37614200  | 0.03962500  |
| 6 | -2.38010800 | 1.58052700  | -0.33830400 |
| 6 | -1.90535100 | 2.65746600  | 0.64585600  |
| 6 | -0.40626700 | 2.93558800  | 0.56028800  |
| 6 | -2.37136400 | 2.07651500  | -1.79756400 |
| 6 | 2.67518500  | 1.23162700  | 2.05092400  |
| 6 | 2.51424100  | 3.07537200  | 0.30530700  |
| 1 | -2.16215200 | 2.31632400  | 1.65457200  |
| 1 | -2.47329300 | 3.57578200  | 0.46195200  |
| 1 | -0.16018100 | 3.76714800  | 1.23169300  |
| 1 | -0.14345400 | 3.27676800  | -0.44780400 |
| 1 | -1.35857800 | 2.28927200  | -2.15265900 |
| 1 | -2.96869800 | 2.98935700  | -1.88569000 |
| 1 | -2.80058300 | 1.31338200  | -2.45215400 |
| 1 | 3.72016100  | 1.10424300  | 1.75311600  |
| 1 | 2.25597300  | 0.26902500  | 2.34908100  |
| 1 | 2.67028100  | 1.88238700  | 2.94204800  |
| 1 | 2.43103300  | 3.95856200  | 0.95948300  |
| 1 | 2.04395800  | 3.34500000  | -0.64318700 |
| 1 | 3.57951000  | 2.89804300  | 0.13914100  |
| 6 | -3.63375900 | -0.95512200 | -0.54027100 |
| 6 | -4.31289200 | -2.13564500 | -0.87490500 |
| 1 | -3.73805200 | -3.04619600 | -1.02079500 |
| 6 | -5.69964900 | -2.14852700 | -1.00602300 |
| 1 | -6.21339400 | -3.06892500 | -1.26478400 |
| 6 | -6.42614200 | -0.97338100 | -0.79084800 |
| 1 | -7.50810100 | -0.97805800 | -0.88566700 |
| 6 | -5.77273300 | 0.21400300  | -0.45756300 |
| 1 | -6.31910100 | 1.13494200  | -0.28302500 |
| 6 | -4.38398400 | 0.21883900  | -0.34174000 |
| 6 | -2.19661100 | -0.88764200 | -0.33740000 |
| 1 | -1.64192700 | -1.81802600 | -0.28752600 |
| 6 | -1.56924200 | 0.29487200  | -0.19092600 |
| 6 | 2.74175600  | -1.96456000 | 0.00993600  |
| 1 | 2.27746000  | -2.81682100 | 0.48543600  |
| 6 | 4.07107600  | -2.00211100 | -0.32083500 |
| 1 | 4.67224100  | -2.87976300 | -0.10744400 |
| 6 | 4.70022400  | -0.90222600 | -0.95875600 |
| 6 | 3.94010700  | 0.20420600  | -1.30659900 |
| 1 | 4.36841600  | 1.02740300  | -1.86571000 |
| 6 | 2.57220100  | 0.25031100  | -0.97244800 |
| 6 | 1.94344200  | -0.81233400 | -0.27164900 |
| 6 | -0.06757300 | 0.40495900  | -0.13331000 |
| 1 | 0.25414200  | 0.83475900  | -1.08496700 |
| 6 | 0.43470000  | 1.71139500  | 0.95612600  |
| 1 | 0.08118400  | 1.26034900  | 1.88630600  |
| 6 | 1.86842800  | 1.90364500  | 0.98420900  |
| 7 | 0.64651700  | -0.75063600 | 0.18379300  |
| 1 | 1.99477400  | 1.04995200  | -1.41229700 |
| 5 | 0.24267200  | -1.62308300 | 1.52231100  |
| 9 | -0.17025800 | -2.87632500 | 1.09823000  |
| 9 | 1.38625300  | -1.71153000 | 2.31988900  |
| 9 | -0.73806500 | -0.90904600 | 2.19067700  |

|   |            |             |             |
|---|------------|-------------|-------------|
| 8 | 6.02602400 | -1.06272000 | -1.21786600 |
| 6 | 6.71389600 | -0.00142600 | -1.86251600 |
| 1 | 7.75283500 | -0.32173600 | -1.94728900 |
| 1 | 6.31065700 | 0.18944400  | -2.86509100 |
| 1 | 6.66513800 | 0.92387400  | -1.27403600 |

TS-cf-B-13

E(RB3LYP) = -1460.539029 a.u.

|   |             |             |             |
|---|-------------|-------------|-------------|
| 8 | -3.61417700 | -0.94820300 | 0.96441000  |
| 6 | -2.34742800 | -0.23578000 | 1.17210200  |
| 6 | -1.64483700 | -1.11583300 | 2.22880000  |
| 6 | -0.11747400 | -1.04802500 | 2.20484000  |
| 6 | -2.69949100 | 1.13634900  | 1.76477400  |
| 1 | -1.95772900 | -2.15158100 | 2.05329200  |
| 1 | -2.02213200 | -0.83689500 | 3.21755700  |
| 1 | 0.27344400  | -1.65014900 | 3.03352200  |
| 1 | 0.23493300  | -0.02215500 | 2.35695400  |
| 1 | -1.81063200 | 1.64751100  | 2.13185600  |
| 1 | -3.39452000 | 0.97078300  | 2.59443000  |
| 1 | -3.16952800 | 1.78042400  | 1.02099900  |
| 6 | -3.76984500 | -0.16078800 | -1.29442900 |
| 6 | -4.57743700 | 0.12840100  | -2.40270700 |
| 1 | -4.10805800 | 0.46668600  | -3.32298000 |
| 6 | -5.96125100 | -0.01497000 | -2.33018200 |
| 1 | -6.57885600 | 0.21809900  | -3.19174800 |
| 6 | -6.54890600 | -0.46788900 | -1.14454700 |
| 1 | -7.62697100 | -0.58556200 | -1.08411000 |
| 6 | -5.76412000 | -0.76328600 | -0.02924000 |
| 1 | -6.20260800 | -1.11583900 | 0.89834900  |
| 6 | -4.38153900 | -0.59722200 | -0.10390500 |
| 6 | -2.31818400 | -0.12392200 | -1.30653600 |
| 1 | -1.82066300 | -0.06130400 | -2.27234100 |
| 6 | -1.59201400 | -0.16524800 | -0.17265800 |
| 6 | -0.08857000 | -0.24908500 | -0.31802700 |
| 6 | 0.38830900  | -1.60057100 | 0.86889400  |
| 7 | 0.73867900  | 0.84252800  | -0.11178100 |
| 5 | 0.23875600  | 2.31225200  | 0.41342100  |
| 9 | 1.09930400  | 3.24728200  | -0.12979500 |
| 9 | -1.04650000 | 2.49880600  | -0.04510700 |
| 9 | 0.31927400  | 2.29742700  | 1.81462500  |
| 6 | 2.03027700  | -3.21966800 | -0.14728400 |
| 1 | 1.93825300  | -4.14287700 | 0.44501500  |
| 1 | 1.32470300  | -3.30369200 | -0.97939500 |
| 1 | 3.05036000  | -3.19370700 | -0.54026000 |
| 6 | 2.79677900  | -1.68510900 | 1.73005300  |
| 1 | 3.76566400  | -1.53030400 | 1.24196900  |
| 1 | 2.55207000  | -0.80115400 | 2.31791900  |
| 1 | 2.92906900  | -2.52998700 | 2.42462200  |
| 1 | 0.13489100  | -0.79106700 | -1.23662900 |
| 1 | -0.29822000 | -2.33763800 | 0.44240100  |
| 6 | 2.08978500  | 0.65835900  | -0.35875500 |
| 6 | 3.05515900  | 1.46994300  | 0.31361800  |
| 6 | 2.58749300  | -0.37091400 | -1.18840500 |
| 6 | 4.40004700  | 1.25976900  | 0.13944000  |
| 1 | 2.71625200  | 2.24331100  | 0.98652200  |
| 6 | 3.96342400  | -0.56099000 | -1.39523500 |
| 1 | 1.91061200  | -0.94851000 | -1.80442800 |
| 6 | 4.87770300  | 0.24307300  | -0.72405700 |
| 1 | 5.12945300  | 1.86686700  | 0.66532600  |
| 1 | 4.28889300  | -1.33020500 | -2.08505800 |
| 6 | 1.73356400  | -2.04042800 | 0.73843400  |

|   |            |             |             |
|---|------------|-------------|-------------|
| 8 | 6.22845900 | 0.15666200  | -0.83043400 |
| 6 | 6.77394500 | -0.83193000 | -1.69367400 |
| 1 | 6.45711400 | -0.67600500 | -2.73204700 |
| 1 | 7.85695100 | -0.72575100 | -1.62638700 |
| 1 | 6.48743000 | -1.84295600 | -1.37717500 |

*trans*-13-B

**E (RB3LYP) = -1460.586942 a.u.**

|   |             |             |             |
|---|-------------|-------------|-------------|
| 6 | 5.24214700  | -2.41218600 | -1.50094600 |
| 6 | 6.07650700  | -1.29196300 | -1.47234300 |
| 6 | 5.58123100  | -0.05005500 | -1.07075400 |
| 6 | 4.24273300  | 0.06681700  | -0.69965700 |
| 6 | 3.38296800  | -1.04632700 | -0.73198700 |
| 6 | 3.90329000  | -2.28304800 | -1.13439400 |
| 8 | 3.77491400  | 1.30918300  | -0.37364900 |
| 6 | 2.57278000  | 1.44665300  | 0.43368700  |
| 6 | 1.58093800  | 0.31672600  | 0.17040100  |
| 6 | 1.98894500  | -0.84409600 | -0.36061600 |
| 6 | 2.00480000  | 2.81465600  | -0.01524500 |
| 6 | 0.52394600  | 3.05193200  | 0.32800500  |
| 6 | -0.32387400 | 1.86948100  | -0.17303500 |
| 6 | 0.16473300  | 0.63401300  | 0.61535100  |
| 6 | 3.00345800  | 1.45025400  | 1.91154700  |
| 6 | -1.86660200 | 2.01074000  | -0.16071400 |
| 6 | -2.36961200 | 0.67693700  | -0.82346600 |
| 6 | -1.85359800 | -0.53682500 | -0.06713900 |
| 7 | -0.72548600 | -0.53575400 | 0.58852500  |
| 6 | -3.84379300 | 0.62800200  | -1.12083200 |
| 6 | -4.58079500 | -0.49250600 | -0.98430900 |
| 6 | -3.95194500 | -1.71088900 | -0.50004300 |
| 6 | -2.66871800 | -1.74033400 | -0.07306400 |
| 6 | -2.28561200 | 3.21606000  | -1.02182900 |
| 6 | -2.45080300 | 2.16582300  | 1.25668100  |
| 1 | 5.63177500  | -3.37760800 | -1.80809300 |
| 1 | 7.12047100  | -1.38269100 | -1.75803300 |
| 1 | 6.21277000  | 0.83176600  | -1.04181300 |
| 1 | 3.24265900  | -3.14587400 | -1.15407600 |
| 1 | 1.30173500  | -1.67669200 | -0.47249600 |
| 1 | 2.12016500  | 2.85278700  | -1.10389700 |
| 1 | 2.63019500  | 3.61344600  | 0.39755700  |
| 1 | 0.21059000  | 3.98864200  | -0.14235300 |
| 1 | 0.38759100  | 3.18288800  | 1.40908800  |
| 1 | -0.04869600 | 1.71552200  | -1.22697000 |
| 1 | 0.21592000  | 0.90792700  | 1.67639700  |
| 1 | 2.16236500  | 1.65748000  | 2.57927100  |
| 1 | 3.76807500  | 2.21757000  | 2.06637100  |
| 1 | 3.41426600  | 0.47610600  | 2.18786700  |
| 1 | -4.30531100 | 1.50157000  | -1.56455200 |
| 1 | -4.52475300 | -2.63133300 | -0.48020100 |
| 1 | -2.22620200 | -2.65612800 | 0.29185800  |
| 1 | -3.37179900 | 3.33231500  | -1.05297500 |
| 1 | -1.92201000 | 3.12469000  | -2.05182300 |
| 1 | -1.88393600 | 4.14382000  | -0.60655100 |
| 1 | -3.54298900 | 2.22214800  | 1.21143600  |
| 1 | -2.09005700 | 3.08708900  | 1.72422800  |
| 1 | -2.19237600 | 1.33035300  | 1.91353500  |
| 5 | -0.40395700 | -1.71969700 | 1.73340700  |
| 9 | -1.55543900 | -1.80153900 | 2.49234000  |
| 9 | 0.66925800  | -1.25997500 | 2.45733600  |
| 9 | -0.14601800 | -2.88785400 | 1.03047800  |
| 1 | -1.87297700 | 0.63781600  | -1.81190600 |

|   |             |             |             |
|---|-------------|-------------|-------------|
| 8 | -5.89193700 | -0.45859400 | -1.37106800 |
| 6 | -6.75633800 | -1.52340900 | -0.99216700 |
| 1 | -6.52579600 | -2.45241000 | -1.52852600 |
| 1 | -6.72765800 | -1.71059200 | 0.08807000  |
| 1 | -7.76055200 | -1.20098500 | -1.27056800 |

*cis*-13-B**E (RB3LYP) = -1460.578494 a.u.**

|   |             |             |             |
|---|-------------|-------------|-------------|
| 8 | 3.66329800  | 1.15158000  | 0.78535000  |
| 6 | 2.29118700  | 0.71960700  | 1.04805800  |
| 6 | 1.62021000  | 2.00430900  | 1.56464500  |
| 6 | 0.09306200  | 1.95701100  | 1.50319600  |
| 6 | 2.35266900  | -0.35753600 | 2.14010400  |
| 1 | 1.97967600  | 2.83364500  | 0.94446200  |
| 1 | 1.96235600  | 2.19780400  | 2.58663200  |
| 1 | -0.29771900 | 2.89854800  | 1.89895100  |
| 1 | -0.29727800 | 1.15962600  | 2.14687600  |
| 1 | 1.35779700  | -0.65959700 | 2.47210000  |
| 1 | 2.91014800  | 0.04396400  | 2.99237600  |
| 1 | 2.85269700  | -1.25320300 | 1.76986400  |
| 6 | 3.84914400  | -0.30348000 | -1.11887600 |
| 6 | 4.68271600  | -0.98509700 | -2.01519600 |
| 1 | 4.23143900  | -1.54648600 | -2.82941100 |
| 6 | 6.06809700  | -0.94891000 | -1.86947100 |
| 1 | 6.70343700  | -1.48580600 | -2.56672400 |
| 6 | 6.63358200  | -0.21270100 | -0.82413600 |
| 1 | 7.71278900  | -0.17687300 | -0.70670600 |
| 6 | 5.82303500  | 0.47462100  | 0.08022100  |
| 1 | 6.24380800  | 1.05215700  | 0.89659200  |
| 6 | 4.43706200  | 0.42020800  | -0.06409400 |
| 6 | 2.40189800  | -0.24479000 | -1.23614800 |
| 1 | 1.95041000  | -0.61403600 | -2.15479700 |
| 6 | 1.62873000  | 0.23100100  | -0.24597900 |
| 6 | 0.12892700  | 0.36295700  | -0.45665100 |
| 6 | -0.37256100 | 1.75282100  | 0.04935600  |
| 7 | -0.74146300 | -0.71419500 | 0.09629500  |
| 6 | -2.03873800 | 3.15479700  | -1.24338700 |
| 1 | -1.59362500 | 4.06545900  | -0.82914700 |
| 1 | -1.52299300 | 2.93265300  | -2.18454100 |
| 1 | -3.08524000 | 3.37822500  | -1.47131600 |
| 6 | -2.72074500 | 2.33602400  | 1.02378600  |
| 1 | -3.77746600 | 2.44227800  | 0.76501700  |
| 1 | -2.64130200 | 1.56393500  | 1.79360400  |
| 1 | -2.39371100 | 3.28261400  | 1.46154000  |
| 1 | -0.01957200 | 0.33431800  | -1.54664600 |
| 1 | 0.18407500  | 2.47654900  | -0.55878100 |
| 6 | -2.02821900 | -0.51949600 | -0.08090000 |
| 6 | -3.02666100 | -1.38888300 | 0.50295600  |
| 6 | -2.48451500 | 0.66868100  | -0.88881500 |
| 6 | -4.34230300 | -1.21399600 | 0.22343300  |
| 1 | -2.70967200 | -2.16502200 | 1.18254800  |
| 6 | -3.94810300 | 0.71924500  | -1.18195800 |
| 1 | -1.96659600 | 0.58686500  | -1.86001700 |
| 6 | -4.82141700 | -0.17528300 | -0.67054600 |
| 1 | -5.05918100 | -1.87498400 | 0.69741900  |
| 1 | -4.31781500 | 1.50365500  | -1.83250300 |
| 6 | -1.90024000 | 1.99724700  | -0.23627000 |
| 5 | -0.23548300 | -2.18664700 | 0.72453500  |
| 9 | 1.09058800  | -2.34738000 | 0.42759500  |
| 9 | -0.49831400 | -2.10279600 | 2.08576900  |
| 9 | -1.01634600 | -3.13962100 | 0.09719400  |

|   |             |             |             |
|---|-------------|-------------|-------------|
| 6 | -7.06215000 | -1.05932700 | -0.60921400 |
| 1 | -6.76076900 | -2.04677600 | -0.97941800 |
| 1 | -7.19711700 | -1.10434600 | 0.47872700  |
| 1 | -8.01263600 | -0.78374300 | -1.06787500 |
| 8 | -6.14325100 | -0.04343300 | -0.99225900 |



## 14-B

**E(RB3LYP) = -1421.289533 a.u.**

|   |             |             |             |
|---|-------------|-------------|-------------|
| 8 | -3.21195600 | 0.58176800  | -1.64515200 |
| 6 | -1.94325200 | 1.06640500  | -1.09600700 |
| 6 | -2.31552800 | 2.11457900  | -0.00912900 |
| 6 | -1.24339300 | 3.13369400  | 0.42509800  |
| 6 | -1.27287200 | 1.71916500  | -2.30468900 |
| 6 | 2.30620000  | 2.44839000  | 1.96474100  |
| 6 | 1.61829000  | 4.35715500  | 0.43496400  |
| 1 | -2.68599600 | 1.57915000  | 0.87213800  |
| 1 | -3.16511900 | 2.67320700  | -0.41930600 |
| 1 | -1.75202000 | 3.82024500  | 1.11903700  |
| 1 | -0.95983600 | 3.75423000  | -0.43158500 |
| 1 | -0.33288400 | 2.20181000  | -2.03025700 |
| 1 | -1.94047500 | 2.48226900  | -2.71259200 |
| 1 | -1.08371400 | 0.98017200  | -3.08827100 |
| 1 | 3.21277600  | 2.29203300  | 1.36620600  |
| 1 | 2.00980500  | 1.48371400  | 2.38153100  |
| 1 | 2.59710600  | 3.10692400  | 2.79481900  |
| 1 | 1.89960400  | 5.12662300  | 1.16636800  |
| 1 | 0.83329200  | 4.77799400  | -0.19679400 |
| 1 | 2.50677800  | 4.19205600  | -0.18849800 |
| 6 | -3.30812500 | -1.17734000 | -0.00392500 |
| 6 | -4.09075600 | -2.12266900 | 0.68429800  |
| 1 | -3.60135800 | -2.79654300 | 1.38181500  |
| 6 | -5.46253100 | -2.18948300 | 0.47904400  |
| 1 | -6.06221600 | -2.91207300 | 1.02246300  |
| 6 | -6.06584900 | -1.32604700 | -0.44598200 |
| 1 | -7.13692800 | -1.38173100 | -0.61706000 |
| 6 | -5.31210300 | -0.38963600 | -1.15026000 |
| 1 | -5.76636000 | 0.28033800  | -1.87218300 |
| 6 | -3.93854900 | -0.30260300 | -0.91562200 |
| 6 | -1.87109800 | -1.13202700 | 0.07361500  |
| 1 | -1.35325400 | -1.97355300 | 0.52047000  |
| 6 | -1.16629800 | -0.11785300 | -0.49974800 |
| 6 | 3.14864400  | -2.10915700 | -0.19877200 |
| 1 | 2.63275700  | -2.93927600 | 0.26897900  |
| 6 | 4.44840200  | -2.25772100 | -0.66978700 |
| 1 | 4.95337500  | -3.21526300 | -0.56490500 |
| 6 | 5.10743200  | -1.18066400 | -1.27450900 |
| 6 | 4.45492300  | 0.05009500  | -1.40128800 |
| 1 | 4.98475000  | 0.88297000  | -1.85037400 |
| 6 | 3.15320300  | 0.19498500  | -0.93313100 |
| 6 | 2.48856900  | -0.88459700 | -0.34019300 |
| 6 | 0.26709400  | -0.19343400 | -0.65142300 |
| 1 | 0.67122400  | 0.24541800  | -1.56226800 |
| 6 | -0.02767400 | 2.56167200  | 1.11467700  |
| 1 | -0.20116600 | 1.65975000  | 1.69793500  |
| 6 | 1.21070500  | 3.08620400  | 1.14199400  |
| 7 | 1.13317500  | -0.77800800 | 0.12831100  |
| 1 | 2.66394300  | 1.16163500  | -0.99717800 |
| 5 | 0.85978400  | -1.34183900 | 1.68009300  |
| 9 | 0.50391900  | -2.67735800 | 1.53168600  |
| 9 | 2.05239400  | -1.16576200 | 2.33643300  |
| 9 | -0.15229000 | -0.57668400 | 2.22490700  |

|   |            |             |             |
|---|------------|-------------|-------------|
| 8 | 6.38295700 | -1.26800100 | -1.75047200 |
| 1 | 6.72794600 | -2.15343100 | -1.57517300 |

TS-tf-B-14

E(RB3LYP) = -1421.241573 a.u.

|   |             |             |             |
|---|-------------|-------------|-------------|
| 8 | -3.51939800 | 1.36364200  | 0.16931100  |
| 6 | -2.15914100 | 1.57617000  | -0.29067800 |
| 6 | -1.62954400 | 2.65289000  | 0.66511100  |
| 6 | -0.13840900 | 2.93212000  | 0.49002700  |
| 6 | -2.23882700 | 2.07409000  | -1.74717100 |
| 6 | 3.02848400  | 1.25505200  | 1.79863400  |
| 6 | 2.75602800  | 3.08534600  | 0.05583600  |
| 1 | -1.82578400 | 2.31049800  | 1.68692400  |
| 1 | -2.20782100 | 3.57110000  | 0.51627100  |
| 1 | 0.14962000  | 3.75720000  | 1.15232700  |
| 1 | 0.06284200  | 3.28054900  | -0.52955900 |
| 1 | -1.24930100 | 2.28856400  | -2.16198900 |
| 1 | -2.84147100 | 2.98625900  | -1.79868000 |
| 1 | -2.70524000 | 1.31102400  | -2.37587300 |
| 1 | 4.06035400  | 1.14325100  | 1.45283000  |
| 1 | 2.63850400  | 0.28928200  | 2.12490900  |
| 1 | 3.05422000  | 1.91463600  | 2.68306600  |
| 1 | 2.69130500  | 3.96689200  | 0.71441800  |
| 1 | 2.23638200  | 3.34854400  | -0.86834500 |
| 1 | 3.81412700  | 2.92344700  | -0.16185100 |
| 6 | -3.40813300 | -0.96332200 | -0.43350700 |
| 6 | -4.09956600 | -2.14491000 | -0.73722200 |
| 1 | -3.52959500 | -3.05133900 | -0.92266500 |
| 6 | -5.49154000 | -2.16451900 | -0.78849400 |
| 1 | -6.01459400 | -3.08584200 | -1.02438200 |
| 6 | -6.21042100 | -0.99512100 | -0.52281100 |
| 1 | -7.29600400 | -1.00504000 | -0.55518300 |
| 6 | -5.54477400 | 0.19337800  | -0.21894400 |
| 1 | -6.08476500 | 1.11011900  | -0.00654700 |
| 6 | -4.15170200 | 0.20519800  | -0.18371500 |
| 6 | -1.96175800 | -0.88983900 | -0.31101100 |
| 1 | -1.40066600 | -1.81767400 | -0.29447000 |
| 6 | -1.33410500 | 0.29512200  | -0.19369600 |
| 6 | 2.99129200  | -1.94085800 | -0.21600000 |
| 1 | 2.55720500  | -2.79698000 | 0.28055400  |
| 6 | 4.30709200  | -1.96555000 | -0.60870700 |
| 1 | 4.90778900  | -2.85118500 | -0.41127400 |
| 6 | 4.89231600  | -0.86110800 | -1.27502800 |
| 6 | 4.10576300  | 0.23293200  | -1.59160100 |
| 1 | 4.53271100  | 1.04048200  | -2.17663400 |
| 6 | 2.75797900  | 0.27241800  | -1.19588500 |
| 6 | 2.17145200  | -0.79772600 | -0.46041000 |
| 6 | 0.16995700  | 0.41759500  | -0.21407600 |
| 1 | 0.42970300  | 0.83180700  | -1.19202800 |
| 6 | 0.72287200  | 1.70132200  | 0.82308600  |
| 1 | 0.43505700  | 1.26492000  | 1.78296300  |
| 6 | 2.16192200  | 1.90580400  | 0.76668400  |
| 7 | 0.90252900  | -0.74446700 | 0.06183600  |
| 1 | 2.14984500  | 1.05661700  | -1.62212200 |
| 5 | 0.57949600  | -1.61522300 | 1.42048500  |
| 9 | 0.16221200  | -2.87596300 | 1.02235500  |
| 9 | 1.76504700  | -1.68877500 | 2.15895600  |
| 9 | -0.37289900 | -0.91186900 | 2.13814700  |

|   |            |             |             |
|---|------------|-------------|-------------|
| 8 | 6.19948700 | -0.85978600 | -1.66315600 |
| 1 | 6.60702400 | -1.70003000 | -1.41482200 |

**TS-cf-B-14****E(RB3LYP) = -1421.233508 a.u.**

|   |             |             |             |
|---|-------------|-------------|-------------|
| 8 | 3.34098000  | 1.02954400  | 0.93032600  |
| 6 | 2.04563800  | 0.38332400  | 1.17195000  |
| 6 | 1.31723800  | 1.42508200  | 2.04797500  |
| 6 | -0.20830300 | 1.38291100  | 1.95563000  |
| 6 | 2.32439800  | -0.89700100 | 1.97137300  |
| 1 | 1.66557600  | 2.41638200  | 1.73605200  |
| 1 | 1.63906300  | 1.29070500  | 3.08548200  |
| 1 | -0.62356000 | 2.10857300  | 2.66470000  |
| 1 | -0.59595900 | 0.39795300  | 2.23734900  |
| 1 | 1.40402100  | -1.32960600 | 2.36163200  |
| 1 | 2.98362800  | -0.63142900 | 2.80437900  |
| 1 | 2.80922400  | -1.65235600 | 1.35231500  |
| 6 | 3.58129000  | -0.07028300 | -1.18554000 |
| 6 | 4.43147300  | -0.53020000 | -2.20023700 |
| 1 | 3.99654400  | -0.98299200 | -3.08760400 |
| 6 | 5.81393300  | -0.40954600 | -2.07752300 |
| 1 | 6.46459300  | -0.77476800 | -2.86574600 |
| 6 | 6.35776100  | 0.19142300  | -0.93769800 |
| 1 | 7.43474800  | 0.29199900  | -0.83916800 |
| 6 | 5.53007000  | 0.65779300  | 0.08434700  |
| 1 | 5.93434500  | 1.12693000  | 0.97510900  |
| 6 | 4.14833200  | 0.51426900  | -0.03744800 |
| 6 | 2.13150200  | -0.07318300 | -1.26677000 |
| 1 | 1.67903200  | -0.25645400 | -2.23932000 |
| 6 | 1.35391500  | 0.14336700  | -0.18847900 |
| 6 | -0.13910100 | 0.24494000  | -0.42222200 |
| 6 | -0.63226100 | 1.73963700  | 0.52678700  |
| 7 | -1.00243000 | -0.79857000 | -0.11575800 |
| 5 | -0.56540500 | -2.19384900 | 0.61853400  |
| 9 | -1.42430000 | -3.17636100 | 0.16034000  |
| 9 | 0.73474900  | -2.46501700 | 0.25367000  |
| 9 | -0.71319200 | -1.99613400 | 2.00070500  |
| 6 | -2.17449500 | 3.23910900  | -0.78775900 |
| 1 | -2.07199800 | 4.23430100  | -0.32852100 |
| 1 | -1.43067200 | 3.18006100  | -1.58790300 |
| 1 | -3.17712900 | 3.18873400  | -1.22041300 |
| 6 | -3.07619700 | 2.00843300  | 1.24721600  |
| 1 | -4.02586500 | 1.81216100  | 0.73659800  |
| 1 | -2.88606000 | 1.21132000  | 1.96513000  |
| 1 | -3.21273500 | 2.94699400  | 1.80782300  |
| 1 | -0.29595400 | 0.64816100  | -1.42307600 |
| 1 | 0.09003400  | 2.40322100  | 0.04191800  |
| 6 | -2.33416800 | -0.62473600 | -0.45410100 |
| 6 | -3.34778400 | -1.31804000 | 0.27117200  |
| 6 | -2.76640200 | 0.28831200  | -1.44671500 |
| 6 | -4.68100200 | -1.11026000 | 0.00016400  |
| 1 | -3.06063900 | -1.99665800 | 1.06045600  |
| 6 | -4.12206300 | 0.47157600  | -1.74126400 |
| 1 | -2.04522200 | 0.76197200  | -2.10002500 |
| 6 | -5.08671000 | -0.21439300 | -1.01511600 |
| 1 | -5.43392000 | -1.63814700 | 0.58187800  |
| 1 | -4.43183500 | 1.13677400  | -2.54007400 |
| 6 | -1.95827900 | 2.19231000  | 0.26988800  |

|   |             |             |             |
|---|-------------|-------------|-------------|
| 8 | -6.39652900 | -0.00693200 | -1.32125400 |
| 1 | -6.94885100 | -0.58693800 | -0.78011000 |

*trans-14-B***E (RB3LYP) = -1421.283596 a.u.**

|   |             |             |             |
|---|-------------|-------------|-------------|
| 6 | 5.17524800  | -2.10246600 | -1.47480600 |
| 6 | 5.93741900  | -0.93574900 | -1.37595300 |
| 6 | 5.35410800  | 0.25655400  | -0.94360900 |
| 6 | 4.00042200  | 0.27639200  | -0.61217900 |
| 6 | 3.21246300  | -0.88455900 | -0.71491000 |
| 6 | 3.82046400  | -2.07016100 | -1.14746600 |
| 8 | 3.44609400  | 1.47384300  | -0.25480100 |
| 6 | 2.21934000  | 1.50255400  | 0.52532800  |
| 6 | 1.30464500  | 0.32836500  | 0.18452300  |
| 6 | 1.79816600  | -0.78225200 | -0.38054500 |
| 6 | 1.58148100  | 2.85468600  | 0.12448400  |
| 6 | 0.08031000  | 2.98616300  | 0.43256700  |
| 6 | -0.67902300 | 1.78118700  | -0.15005900 |
| 6 | -0.13997000 | 0.54185700  | 0.59833000  |
| 6 | 2.61194000  | 1.46101500  | 2.01314900  |
| 6 | -2.22699500 | 1.82938100  | -0.18280300 |
| 6 | -2.62894500 | 0.49943200  | -0.91795400 |
| 6 | -2.06514800 | -0.71388900 | -0.19346800 |
| 7 | -0.95876900 | -0.67513400 | 0.49561000  |
| 6 | -4.08896900 | 0.38023100  | -1.26848500 |
| 6 | -4.75455300 | -0.78669400 | -1.19499800 |
| 6 | -4.07342700 | -1.98481400 | -0.73544100 |
| 6 | -2.80665000 | -1.96466500 | -0.26745500 |
| 6 | -2.69072500 | 3.04415500  | -1.00692800 |
| 6 | -2.86191200 | 1.88887700  | 1.22002100  |
| 1 | 5.63322900  | -3.02919300 | -1.80587900 |
| 1 | 6.99320000  | -0.95146100 | -1.63044800 |
| 1 | 5.92836300  | 1.17337400  | -0.86032200 |
| 1 | 3.21581000  | -2.97026000 | -1.22180400 |
| 1 | 1.16719900  | -1.64908300 | -0.54914400 |
| 1 | 1.72471400  | 2.95318900  | -0.95702600 |
| 1 | 2.14531600  | 3.66794200  | 0.59384200  |
| 1 | -0.27625100 | 3.92484500  | -0.00181000 |
| 1 | -0.09435000 | 3.05516700  | 1.51383800  |
| 1 | -0.36352900 | 1.69390200  | -1.20013700 |
| 1 | -0.13548700 | 0.77051800  | 1.67119700  |
| 1 | 1.74400100  | 1.59092200  | 2.66601300  |
| 1 | 3.32801000  | 2.26121500  | 2.22359600  |
| 1 | 3.06948600  | 0.49902200  | 2.25665300  |
| 1 | -4.58674300 | 1.24345800  | -1.69219900 |
| 1 | -4.60803900 | -2.93250200 | -0.77455300 |
| 1 | -2.32259600 | -2.86664400 | 0.07831700  |
| 1 | -3.78044400 | 3.10024300  | -1.06669500 |
| 1 | -2.29330900 | 3.01632500  | -2.02812900 |
| 1 | -2.35482800 | 3.97503500  | -0.54310000 |
| 1 | -3.95373300 | 1.88407900  | 1.14242500  |
| 1 | -2.56992600 | 2.80840500  | 1.73644000  |
| 1 | -2.57418000 | 1.04265600  | 1.85043200  |
| 5 | -0.60009800 | -1.88641000 | 1.60340400  |
| 9 | -1.76643700 | -2.06326800 | 2.32213400  |
| 9 | 0.42406500  | -1.39677800 | 2.37606500  |
| 9 | -0.25704900 | -3.00743700 | 0.86188800  |
| 1 | -2.09793200 | 0.53102900  | -1.88843100 |

|   |             |             |             |
|---|-------------|-------------|-------------|
| 8 | -6.05807600 | -0.86429300 | -1.60007400 |
| 1 | -6.41360300 | -1.73684600 | -1.38921500 |



*cis*-14-B**E(RB3LYP) = -1421.275109 a.u.**

|   |             |             |             |
|---|-------------|-------------|-------------|
| 8 | 3.35329700  | 1.23500900  | 0.80542400  |
| 6 | 1.99283400  | 0.76128800  | 1.05514700  |
| 6 | 1.27555700  | 2.02595000  | 1.55814200  |
| 6 | -0.24831200 | 1.92117000  | 1.49092300  |
| 6 | 2.07576100  | -0.30863500 | 2.15305400  |
| 1 | 1.60774600  | 2.86273800  | 0.93268000  |
| 1 | 1.60595800  | 2.23941200  | 2.57999000  |
| 1 | -0.67746900 | 2.84852700  | 1.88088000  |
| 1 | -0.61009500 | 1.11213100  | 2.13652300  |
| 1 | 1.08726300  | -0.64362700 | 2.47253300  |
| 1 | 2.60709200  | 0.11496600  | 3.01130100  |
| 1 | 2.61131400  | -1.18800400 | 1.79377300  |
| 6 | 3.60550900  | -0.22071200 | -1.09045700 |
| 6 | 4.46952600  | -0.88022200 | -1.97443600 |
| 1 | 4.04500200  | -1.45801900 | -2.79154800 |
| 6 | 5.85134600  | -0.80175000 | -1.81275800 |
| 1 | 6.51068100  | -1.32188500 | -2.50035200 |
| 6 | 6.38217600  | -0.04494800 | -0.76396400 |
| 1 | 7.45836500  | 0.02379000  | -0.63423000 |
| 6 | 5.54087400  | 0.62108400  | 0.12818400  |
| 1 | 5.93453600  | 1.21408500  | 0.94697700  |
| 6 | 4.15899000  | 0.52424500  | -0.03195000 |
| 6 | 2.15868600  | -0.20659600 | -1.22400700 |
| 1 | 1.72899300  | -0.59234100 | -2.14636800 |
| 6 | 1.36009000  | 0.24758500  | -0.24377500 |
| 6 | -0.14052600 | 0.32809700  | -0.47224700 |
| 6 | -0.70340400 | 1.69308500  | 0.03764000  |
| 7 | -0.98043000 | -0.78970000 | 0.04926300  |
| 6 | -2.43960700 | 3.06561000  | -1.19413300 |
| 1 | -2.03215200 | 3.97482500  | -0.73985600 |
| 1 | -1.92271500 | 2.91194200  | -2.14818600 |
| 1 | -3.49701700 | 3.25235600  | -1.40370800 |
| 6 | -3.08254700 | 2.10744500  | 1.02744600  |
| 1 | -4.14283700 | 2.16207300  | 0.76718600  |
| 1 | -2.95986700 | 1.31135100  | 1.76652500  |
| 1 | -2.81383500 | 3.05305400  | 1.50501800  |
| 1 | -0.27092900 | 0.30650600  | -1.56435300 |
| 1 | -0.18056500 | 2.44027800  | -0.57231500 |
| 6 | -2.26800400 | -0.64567500 | -0.16136400 |
| 6 | -3.24412500 | -1.57002200 | 0.38114200  |
| 6 | -2.75208900 | 0.54296800  | -0.95485400 |
| 6 | -4.55434900 | -1.43548900 | 0.06735900  |
| 1 | -2.91339900 | -2.35006300 | 1.04913600  |
| 6 | -4.20963800 | 0.54401200  | -1.28883300 |
| 1 | -2.20389100 | 0.51220300  | -1.91188500 |
| 6 | -5.05029100 | -0.39706800 | -0.81573000 |
| 1 | -5.27229200 | -2.13001700 | 0.50093000  |
| 1 | -4.59106700 | 1.32442400  | -1.93700700 |
| 6 | -2.24121900 | 1.87052000  | -0.24277700 |
| 5 | -0.42749700 | -2.23837300 | 0.69841300  |
| 9 | 0.91071900  | -2.34392100 | 0.43591700  |
| 9 | -0.72938000 | -2.15661300 | 2.05080800  |
| 9 | -1.15061100 | -3.22709900 | 0.05693500  |

|   |             |             |             |
|---|-------------|-------------|-------------|
| 8 | -6.37678500 | -0.36239400 | -1.14272000 |
| 1 | -6.82041800 | -1.14482400 | -0.79162200 |

## 15-B

**E(RB3LYP) = -3917.167284 a.u.**

|    |             |             |             |
|----|-------------|-------------|-------------|
| 8  | -3.34231400 | -0.09529600 | -1.75029100 |
| 6  | -2.15993600 | 0.71761200  | -1.44855100 |
| 6  | -2.70538100 | 2.02757600  | -0.81695800 |
| 6  | -1.74321300 | 3.21370500  | -0.61979000 |
| 6  | -1.56544100 | 0.96550500  | -2.83675100 |
| 6  | 1.11187700  | 3.69472500  | 2.03277000  |
| 6  | 0.54439100  | 5.16813000  | 0.02812400  |
| 1  | -3.16289600 | 1.77664400  | 0.14703900  |
| 1  | -3.52094500 | 2.34792100  | -1.47573700 |
| 1  | -2.37879800 | 4.08959800  | -0.42611700 |
| 1  | -1.23499200 | 3.44311300  | -1.56511300 |
| 1  | -0.73190300 | 1.66985700  | -2.80890700 |
| 1  | -2.34119200 | 1.38837200  | -3.47964600 |
| 1  | -1.22488400 | 0.02814300  | -3.28489200 |
| 1  | 2.17756300  | 3.69362700  | 1.76666500  |
| 1  | 0.88327600  | 2.74734700  | 2.52443500  |
| 1  | 0.98027200  | 4.50783900  | 2.75969400  |
| 1  | 0.40090800  | 6.06077800  | 0.65149200  |
| 1  | -0.08208500 | 5.27966300  | -0.85961900 |
| 1  | 1.59426100  | 5.18641400  | -0.29284300 |
| 6  | -3.23282000 | -1.15041000 | 0.40916200  |
| 6  | -3.89346400 | -1.88646000 | 1.41179500  |
| 1  | -3.33025200 | -2.19742600 | 2.28701300  |
| 6  | -5.23800500 | -2.20482800 | 1.28353200  |
| 1  | -5.74583000 | -2.76071900 | 2.06452100  |
| 6  | -5.93312000 | -1.81672700 | 0.12853800  |
| 1  | -6.98260000 | -2.07422700 | 0.01961300  |
| 6  | -5.30053200 | -1.10081900 | -0.88489500 |
| 1  | -5.82673900 | -0.80080400 | -1.78449400 |
| 6  | -3.95695500 | -0.75063500 | -0.73567400 |
| 6  | -1.81877600 | -0.89461500 | 0.42365800  |
| 1  | -1.20364200 | -1.45092600 | 1.12108200  |
| 6  | -1.24098000 | -0.06315000 | -0.49181300 |
| 6  | 3.27482600  | -1.13956100 | -0.58890100 |
| 6  | 4.58003100  | -0.96378600 | -1.04483600 |
| 1  | 5.17931500  | -1.83340100 | -1.28890400 |
| 6  | 5.09573400  | 0.32381600  | -1.18771900 |
| 6  | 4.30547000  | 1.43196100  | -0.88258600 |
| 1  | 4.70262000  | 2.43586500  | -0.99364600 |
| 6  | 3.00183100  | 1.25137500  | -0.42386100 |
| 6  | 2.47924200  | -0.03469400 | -0.26987300 |
| 6  | 0.18691900  | 0.05739800  | -0.63706100 |
| 1  | 0.53251900  | 0.40456100  | -1.60923800 |
| 6  | -0.75004300 | 3.06384900  | 0.51464900  |
| 1  | -0.89049600 | 2.20883000  | 1.17073100  |
| 6  | 0.24216200  | 3.91784800  | 0.81820300  |
| 7  | 1.13524700  | -0.20243000 | 0.22166300  |
| 1  | 2.37330800  | 2.09761400  | -0.16667600 |
| 5  | 1.00045300  | -0.51426100 | 1.86724500  |
| 9  | 0.55751200  | -1.81767000 | 2.00977100  |
| 9  | 2.26070000  | -0.31352700 | 2.35719200  |
| 9  | 0.07535200  | 0.40532000  | 2.34144000  |
| 1  | 6.11391100  | 0.45569100  | -1.54019100 |
| 35 | 2.56468200  | -2.89679100 | -0.43669700 |

TS-tf-B-15

E(RB3LYP) = -3917.118631 a.u.

|    |             |             |             |
|----|-------------|-------------|-------------|
| 8  | -3.89378000 | 1.19131100  | 0.12849200  |
| 6  | -2.59351500 | 1.58590200  | -0.38347200 |
| 6  | -2.25659200 | 2.82646100  | 0.45311800  |
| 6  | -0.83090200 | 3.33098000  | 0.24203800  |
| 6  | -2.77201300 | 1.92445200  | -1.87704100 |
| 6  | 2.52175500  | 2.19349700  | 1.73405200  |
| 6  | 2.00339400  | 4.00490400  | 0.02874900  |
| 1  | -2.40160500 | 2.56243900  | 1.50631000  |
| 1  | -2.97906600 | 3.61486700  | 0.21705000  |
| 1  | -0.69362500 | 4.25488300  | 0.81657500  |
| 1  | -0.67778200 | 3.60640900  | -0.80898900 |
| 1  | -1.84086700 | 2.27426200  | -2.33326700 |
| 1  | -3.52907400 | 2.70606500  | -1.99425100 |
| 1  | -3.09841600 | 1.03654000  | -2.42469400 |
| 1  | 3.56771400  | 2.30764000  | 1.43850200  |
| 1  | 2.32250700  | 1.15442800  | 2.00010600  |
| 1  | 2.37207700  | 2.79200900  | 2.64817300  |
| 1  | 1.75419700  | 4.84111000  | 0.70132900  |
| 1  | 1.48597200  | 4.19913900  | -0.91338100 |
| 1  | 3.08179200  | 4.03567200  | -0.13802700 |
| 6  | -3.40131700 | -1.12751900 | -0.27410000 |
| 6  | -3.88691300 | -2.43126600 | -0.45413200 |
| 1  | -3.17438500 | -3.24218200 | -0.57803400 |
| 6  | -5.25576100 | -2.68738500 | -0.46078600 |
| 1  | -5.61955000 | -3.70035700 | -0.60017800 |
| 6  | -6.15779500 | -1.63486800 | -0.27495300 |
| 1  | -7.22637900 | -1.82913400 | -0.27321300 |
| 6  | -5.69898600 | -0.32932000 | -0.09503400 |
| 1  | -6.38316300 | 0.49941800  | 0.05377100  |
| 6  | -4.32741300 | -0.08230400 | -0.10361800 |
| 6  | -1.98680200 | -0.80599700 | -0.20322500 |
| 1  | -1.28044200 | -1.62371700 | -0.13627000 |
| 6  | -1.56126000 | 0.47262700  | -0.19768800 |
| 6  | 3.10280200  | -0.98908100 | -0.58119800 |
| 6  | 4.39652000  | -0.69108400 | -0.96767900 |
| 1  | 5.14098500  | -1.47777400 | -0.92465900 |
| 6  | 4.74318400  | 0.57776800  | -1.46263900 |
| 6  | 3.74523500  | 1.51414900  | -1.64685500 |
| 1  | 3.95756800  | 2.45982200  | -2.13649000 |
| 6  | 2.43218500  | 1.23959900  | -1.23102700 |
| 6  | 2.07430100  | 0.00926900  | -0.59531400 |
| 6  | -0.10462000 | 0.84113600  | -0.29128600 |
| 1  | 0.05010400  | 1.27288900  | -1.28329000 |
| 6  | 0.20788600  | 2.29566200  | 0.69245200  |
| 1  | -0.04437600 | 1.83924100  | 1.65117800  |
| 6  | 1.58698400  | 2.72582400  | 0.69423500  |
| 7  | 0.83404000  | -0.16265900 | -0.01312600 |
| 1  | 1.66467500  | 1.91764500  | -1.57107600 |
| 5  | 0.69251700  | -0.94714400 | 1.47032000  |
| 9  | 0.17111100  | -2.20793500 | 1.29460400  |
| 9  | 1.96779900  | -0.95377200 | 2.01873800  |
| 9  | -0.15345800 | -0.14557200 | 2.23314800  |
| 1  | 5.76594800  | 0.77802700  | -1.76480700 |
| 35 | 2.73952400  | -2.82144100 | -0.22360000 |

## TS-cf-B-15

E(RB3LYP) = -3917.109317 a.u.

|    |             |             |             |
|----|-------------|-------------|-------------|
| 8  | 3.51316700  | 0.28839000  | 1.44863400  |
| 6  | 2.16364700  | -0.24563500 | 1.21659700  |
| 6  | 1.37635700  | 0.30794500  | 2.42879700  |
| 6  | -0.09949900 | 0.62267100  | 2.16424800  |
| 6  | 2.26731300  | -1.77434800 | 1.25513500  |
| 1  | 1.88067200  | 1.22993900  | 2.73972300  |
| 1  | 1.46629200  | -0.39645700 | 3.26162100  |
| 1  | -0.53537500 | 1.04658700  | 3.07575300  |
| 1  | -0.66781100 | -0.28089700 | 1.92042500  |
| 1  | 1.28115800  | -2.23461600 | 1.25196300  |
| 1  | 2.80793600  | -2.06152500 | 2.16305100  |
| 1  | 2.80703700  | -2.14847600 | 0.38243400  |
| 6  | 3.97485000  | 0.26372500  | -0.90556500 |
| 6  | 4.92867100  | 0.22446000  | -1.93203500 |
| 1  | 4.59320400  | 0.27742300  | -2.96459400 |
| 6  | 6.28619300  | 0.12114400  | -1.63769800 |
| 1  | 7.01621700  | 0.08421500  | -2.44002500 |
| 6  | 6.70346700  | 0.07411600  | -0.30344800 |
| 1  | 7.76117000  | -0.00140000 | -0.06832100 |
| 6  | 5.77228900  | 0.11269100  | 0.73480400  |
| 1  | 6.07806600  | 0.07597600  | 1.77510200  |
| 6  | 4.41345300  | 0.19262000  | 0.43122600  |
| 6  | 2.55394500  | 0.47828900  | -1.11528100 |
| 1  | 2.23116300  | 0.82389000  | -2.09503500 |
| 6  | 1.65264500  | 0.28179200  | -0.13490900 |
| 6  | 0.22196300  | 0.72460600  | -0.37531800 |
| 6  | -0.19416500 | 1.62474000  | 0.99988300  |
| 7  | -0.81064500 | -0.22411100 | -0.61180000 |
| 5  | -0.53490100 | -1.83651300 | -0.89860400 |
| 9  | -1.57911700 | -2.24031300 | -1.70610200 |
| 9  | 0.68268300  | -1.90276200 | -1.54537800 |
| 9  | -0.50874400 | -2.52160200 | 0.31306000  |
| 6  | -1.24928600 | 3.83331100  | 0.36019700  |
| 1  | -1.00241500 | 4.48075800  | 1.21647600  |
| 1  | -0.43110600 | 3.93529300  | -0.35852500 |
| 1  | -2.17339000 | 4.21686800  | -0.07783100 |
| 6  | -2.65874600 | 2.11730100  | 1.59921400  |
| 1  | -3.54035300 | 2.45588000  | 1.04479600  |
| 1  | -2.76922600 | 1.06141200  | 1.84593500  |
| 1  | -2.64599600 | 2.68690800  | 2.54335100  |
| 1  | 0.27631300  | 1.48984600  | -1.15325600 |
| 1  | 0.65722200  | 2.31617600  | 1.01655200  |
| 6  | -2.03655400 | 0.32073400  | -0.91764300 |
| 6  | -3.28391700 | -0.27567700 | -0.52469000 |
| 6  | -2.15148000 | 1.58236900  | -1.56240500 |
| 6  | -4.49538400 | 0.28391100  | -0.88051800 |
| 6  | -3.38507500 | 2.14951700  | -1.91413300 |
| 6  | -4.55970500 | 1.49476300  | -1.59513200 |
| 1  | -5.40745800 | -0.19832300 | -0.54784000 |
| 1  | -3.40256800 | 3.09315200  | -2.45094800 |
| 6  | -1.39806800 | 2.42618700  | 0.86082100  |
| 1  | -5.52560800 | 1.90926100  | -1.86561800 |
| 35 | -3.35499800 | -1.68952800 | 0.73877700  |
| 1  | -1.25743500 | 2.05048700  | -1.95295800 |

*trans-15-B***E(RB3LYP) = -3917.150760 a.u.**

|    |             |             |             |
|----|-------------|-------------|-------------|
| 6  | 4.93094800  | -2.53905300 | -0.94384100 |
| 6  | 5.85305500  | -1.48987900 | -0.97478500 |
| 6  | 5.43914900  | -0.17591700 | -0.74907800 |
| 6  | 4.09373600  | 0.08426500  | -0.49377100 |
| 6  | 3.14762800  | -0.95609200 | -0.46803700 |
| 6  | 3.58678900  | -2.26693800 | -0.69355200 |
| 8  | 3.71219700  | 1.38775400  | -0.34088300 |
| 6  | 2.47426500  | 1.71288900  | 0.34932500  |
| 6  | 1.41323500  | 0.63085200  | 0.16051900  |
| 6  | 1.75505800  | -0.60890300 | -0.21878900 |
| 6  | 2.03756600  | 3.03725100  | -0.32070700 |
| 6  | 0.57049900  | 3.42871000  | -0.08424800 |
| 6  | -0.36018200 | 2.26394100  | -0.46459200 |
| 6  | 0.00144400  | 1.09775500  | 0.47491800  |
| 6  | 2.81159900  | 1.89301900  | 1.84006600  |
| 6  | -1.88514900 | 2.52992000  | -0.47224100 |
| 6  | -2.50175800 | 1.20102200  | -1.01923700 |
| 6  | -1.99221200 | -0.03485400 | -0.28027900 |
| 7  | -0.94905300 | -0.03074900 | 0.49111300  |
| 6  | -4.01070800 | 1.21129700  | -1.13707700 |
| 6  | -4.74608600 | 0.09485900  | -1.02794500 |
| 6  | -4.09143300 | -1.18463700 | -0.82590600 |
| 6  | -2.78168000 | -1.25848200 | -0.50162200 |
| 6  | -2.21020900 | 3.68278200  | -1.44118000 |
| 6  | -2.44067200 | 2.85833800  | 0.92842300  |
| 1  | 5.25723800  | -3.56013000 | -1.11432800 |
| 1  | 6.90213500  | -1.69233800 | -1.17010200 |
| 1  | 6.13942400  | 0.65258000  | -0.76946400 |
| 1  | 2.85854100  | -3.07317700 | -0.66709300 |
| 1  | 1.00754100  | -1.38873900 | -0.30869500 |
| 1  | 2.19791900  | 2.90629100  | -1.39647300 |
| 1  | 2.70847800  | 3.83973900  | 0.00416900  |
| 1  | 0.35159500  | 4.31687300  | -0.68461800 |
| 1  | 0.40797800  | 3.71029600  | 0.96368100  |
| 1  | -0.09568700 | 1.96558700  | -1.49043200 |
| 1  | 0.00183700  | 1.47909500  | 1.49901200  |
| 1  | 1.94294400  | 2.21986000  | 2.41887200  |
| 1  | 3.60428200  | 2.63943700  | 1.94915600  |
| 1  | 3.15718500  | 0.94651400  | 2.26387300  |
| 1  | -4.47712600 | 2.15199900  | -1.40588300 |
| 1  | -4.65655800 | -2.09860700 | -0.97338700 |
| 1  | -3.28638600 | 3.85356400  | -1.53296400 |
| 1  | -1.81170100 | 3.48972700  | -2.44389800 |
| 1  | -1.77683300 | 4.61987200  | -1.08314400 |
| 1  | -3.52303900 | 3.01613900  | 0.88618800  |
| 1  | -1.99129100 | 3.77810100  | 1.31495800  |
| 1  | -2.25219900 | 2.06237500  | 1.65348000  |
| 5  | -0.86137600 | -1.00070300 | 1.96555900  |
| 9  | -2.14577600 | -1.43598700 | 2.15701400  |
| 9  | -0.49062900 | -0.03772500 | 2.87956700  |
| 9  | 0.06280300  | -1.98732400 | 1.79894700  |
| 1  | -2.14191900 | 1.10034200  | -2.06218100 |
| 35 | -1.91018100 | -2.94447400 | -0.47317000 |
| 1  | -5.82224400 | 0.11436000  | -1.16625100 |

*cis*-15-B**E(RB3LYP) = -3917.146640 a.u.**

|    |             |             |             |
|----|-------------|-------------|-------------|
| 8  | -3.26121500 | 0.71850400  | -1.51946700 |
| 6  | -1.84428600 | 0.46605100  | -1.26846600 |
| 6  | -1.14729200 | 1.54629600  | -2.11202200 |
| 6  | 0.32474600  | 1.75330500  | -1.74750700 |
| 6  | -1.52935500 | -0.94614200 | -1.78368800 |
| 1  | -1.69141400 | 2.48477100  | -1.95402900 |
| 1  | -1.25096000 | 1.29296100  | -3.17240400 |
| 1  | 0.72325200  | 2.54902500  | -2.38136900 |
| 1  | 0.90976100  | 0.85411500  | -1.97344200 |
| 1  | -0.46555900 | -1.18039000 | -1.70284400 |
| 1  | -1.83589500 | -1.01732700 | -2.83246900 |
| 1  | -2.06454800 | -1.69462500 | -1.19798000 |
| 6  | -3.85037700 | 0.14681300  | 0.74384300  |
| 6  | -4.84936400 | -0.23634800 | 1.64841200  |
| 1  | -4.59001200 | -0.34999800 | 2.69781800  |
| 6  | -6.15295700 | -0.47084500 | 1.21567500  |
| 1  | -6.91701500 | -0.77238400 | 1.92512600  |
| 6  | -6.47023500 | -0.31049100 | -0.13631500 |
| 1  | -7.48486900 | -0.48793000 | -0.48112100 |
| 6  | -5.49155700 | 0.06937100  | -1.05572500 |
| 1  | -5.71953700 | 0.19825500  | -2.10859600 |
| 6  | -4.18630200 | 0.28818700  | -0.61585400 |
| 6  | -2.48301300 | 0.45264900  | 1.13243600  |
| 1  | -2.24923700 | 0.50552400  | 2.19139800  |
| 6  | -1.51665300 | 0.63117500  | 0.21725700  |
| 6  | -0.09435800 | 0.98456100  | 0.62552900  |
| 6  | 0.45471800  | 2.14030900  | -0.25953800 |
| 7  | 0.80301100  | -0.20413700 | 0.52882300  |
| 6  | 1.69730600  | 3.72007400  | 1.27818300  |
| 1  | 1.26993600  | 4.62172900  | 0.82821800  |
| 1  | 1.02941400  | 3.40011800  | 2.08500800  |
| 1  | 2.65660700  | 3.99885700  | 1.72792800  |
| 6  | 2.71254200  | 3.18342600  | -0.94586100 |
| 1  | 3.64711600  | 3.61056000  | -0.57202000 |
| 1  | 2.96851100  | 2.42148800  | -1.68675800 |
| 1  | 2.17293500  | 3.98649400  | -1.45716100 |
| 1  | -0.11527400 | 1.30374100  | 1.67519700  |
| 1  | -0.23047000 | 2.98230400  | -0.09747900 |
| 6  | 2.08107500  | 0.04115600  | 0.42121100  |
| 6  | 3.03512200  | -0.93371600 | -0.07437300 |
| 6  | 2.60531800  | 1.38823000  | 0.89026200  |
| 6  | 4.37197100  | -0.70934900 | 0.02036100  |
| 6  | 4.09232300  | 1.50713000  | 0.96130400  |
| 1  | 2.25893900  | 1.39918800  | 1.93818500  |
| 6  | 4.90941900  | 0.50004100  | 0.60188000  |
| 1  | 5.05811200  | -1.43860300 | -0.39694700 |
| 1  | 4.49853900  | 2.44270700  | 1.33338200  |
| 6  | 1.86754600  | 2.61849200  | 0.21247100  |
| 5  | 0.28558000  | -1.61738100 | 1.42307100  |
| 9  | -0.28010000 | -1.00187800 | 2.52341200  |
| 9  | -0.58881600 | -2.33893900 | 0.67115300  |
| 9  | 1.44332200  | -2.27799400 | 1.74571400  |
| 1  | 5.98718500  | 0.59672400  | 0.68481800  |
| 35 | 2.40250100  | -2.41006900 | -1.08609100 |

16-B

**E(RB3LYP) = -1460.590149 a.u.**

|   |             |             |             |
|---|-------------|-------------|-------------|
| 8 | -3.29177700 | 0.32192000  | -1.67677400 |
| 6 | -2.03503700 | 0.95558900  | -1.26482700 |
| 6 | -2.44604100 | 2.13914600  | -0.34663100 |
| 6 | -1.39158700 | 3.20191500  | 0.01172300  |
| 6 | -1.46173400 | 1.44716000  | -2.59552900 |
| 6 | 1.81380100  | 2.84418800  | 2.25187000  |
| 6 | 1.26921700  | 4.67946300  | 0.56771500  |
| 1 | -2.86295500 | 1.72347500  | 0.57793200  |
| 1 | -3.27327800 | 2.63637000  | -0.86677200 |
| 1 | -1.94643500 | 4.02662500  | 0.48342400  |
| 1 | -0.97301700 | 3.63520300  | -0.90468100 |
| 1 | -0.55910600 | 2.04607700  | -2.46035500 |
| 1 | -2.20945600 | 2.07171900  | -3.09050800 |
| 1 | -1.23387100 | 0.60375300  | -3.25306300 |
| 1 | 2.81871000  | 2.71134300  | 1.83026000  |
| 1 | 1.48291600  | 1.88226000  | 2.64773400  |
| 1 | 1.92033200  | 3.55004100  | 3.08700300  |
| 1 | 1.33119200  | 5.48064100  | 1.31635300  |
| 1 | 0.58308400  | 5.01199000  | -0.21445000 |
| 1 | 2.27199100  | 4.59514600  | 0.12859300  |
| 6 | -3.22377200 | -1.15259600 | 0.22198200  |
| 6 | -3.92292300 | -2.01616400 | 1.08624500  |
| 1 | -3.36782400 | -2.54412700 | 1.85639400  |
| 6 | -5.29454300 | -2.18762500 | 0.95698700  |
| 1 | -5.82993000 | -2.84511300 | 1.63383800  |
| 6 | -5.98174900 | -1.51707000 | -0.06502300 |
| 1 | -7.05305500 | -1.65702100 | -0.17625900 |
| 6 | -5.31215100 | -0.66724500 | -0.94246900 |
| 1 | -5.83177700 | -0.14750900 | -1.74009700 |
| 6 | -3.93853100 | -0.47055100 | -0.78660700 |
| 6 | -1.79008800 | -1.02812400 | 0.22218600  |
| 1 | -1.21205000 | -1.76735600 | 0.76400700  |
| 6 | -1.16236600 | -0.08229100 | -0.53325600 |
| 6 | 3.37519200  | -1.52049400 | -0.72474800 |
| 6 | 4.68386400  | -1.34585600 | -1.18426900 |
| 1 | 5.32286100  | -2.20617900 | -1.34350600 |
| 6 | 5.16940200  | -0.06287000 | -1.45128700 |
| 6 | 4.36091300  | 1.05479600  | -1.26631600 |
| 1 | 4.74073300  | 2.05142600  | -1.46539400 |
| 6 | 3.05612300  | 0.88588700  | -0.79638200 |
| 6 | 2.56113100  | -0.38673100 | -0.52271300 |
| 6 | 0.26622500  | -0.06458000 | -0.74018300 |
| 1 | 0.59546300  | 0.42146500  | -1.65605100 |
| 6 | -0.29948500 | 2.74311900  | 0.95299400  |
| 1 | -0.49898500 | 1.82965500  | 1.50797900  |
| 6 | 0.85342600  | 3.38178500  | 1.21771100  |
| 7 | 1.22750100  | -0.56256000 | -0.01106900 |
| 1 | 2.41809200  | 1.74194700  | -0.59979600 |
| 5 | 1.11196200  | -1.17427700 | 1.54780800  |
| 9 | 0.53793700  | -2.43232800 | 1.47214300  |
| 9 | 2.39573200  | -1.19213800 | 2.02299900  |
| 9 | 0.30138700  | -0.27425900 | 2.22837900  |
| 1 | 6.18888200  | 0.05344900  | -1.80671300 |



|   |            |             |             |
|---|------------|-------------|-------------|
| 6 | 3.60715500 | -3.87691300 | -0.42165900 |
| 1 | 4.03330400 | -4.12791400 | -1.40151100 |
| 1 | 4.41629200 | -3.74942700 | 0.30662300  |
| 1 | 2.95021200 | -4.68384600 | -0.09671500 |
| 8 | 2.78817700 | -2.71815500 | -0.48854900 |

TS-tf-B-16

E(RB3LYP) = -1460.539740 a.u.

|   |             |             |             |
|---|-------------|-------------|-------------|
| 8 | -3.59136900 | 1.29384600  | 0.27986300  |
| 6 | -2.27922500 | 1.61478600  | -0.25484400 |
| 6 | -1.79462500 | 2.73300700  | 0.67699300  |
| 6 | -0.33762600 | 3.12706500  | 0.44794200  |
| 6 | -2.47921100 | 2.10676800  | -1.70163700 |
| 6 | 2.96210400  | 1.60967200  | 1.68576400  |
| 6 | 2.53510500  | 3.54805500  | 0.09979400  |
| 1 | -1.92385700 | 2.38134400  | 1.70624900  |
| 1 | -2.44902300 | 3.60200600  | 0.54972400  |
| 1 | -0.09808900 | 3.98279000  | 1.09096700  |
| 1 | -0.19718700 | 3.47912400  | -0.58158900 |
| 1 | -1.53543500 | 2.40780600  | -2.16652000 |
| 1 | -3.16008900 | 2.96355400  | -1.71425300 |
| 1 | -2.91075600 | 1.30836200  | -2.31105000 |
| 1 | 3.99144500  | 1.60119200  | 1.31619100  |
| 1 | 2.65384300  | 0.59481000  | 1.94126300  |
| 1 | 2.95613900  | 2.19842300  | 2.61835900  |
| 1 | 2.41247600  | 4.36550200  | 0.82825700  |
| 1 | 1.98766500  | 3.84536300  | -0.79743600 |
| 1 | 3.59984500  | 3.48270100  | -0.13446700 |
| 6 | -3.33766000 | -1.01272100 | -0.35028200 |
| 6 | -3.95193300 | -2.24320300 | -0.62535300 |
| 1 | -3.32484000 | -3.10124000 | -0.85177900 |
| 6 | -5.33870300 | -2.37033300 | -0.59659400 |
| 1 | -5.80234600 | -3.32802200 | -0.81089200 |
| 6 | -6.12892400 | -1.26126700 | -0.27877800 |
| 1 | -7.21057200 | -1.35533200 | -0.24892000 |
| 6 | -5.54092500 | -0.02618300 | -0.00221900 |
| 1 | -6.13697800 | 0.84471500  | 0.24953800  |
| 6 | -4.15306100 | 0.09321200  | -0.04716400 |
| 6 | -1.89710200 | -0.82921800 | -0.31081000 |
| 1 | -1.26780800 | -1.71071300 | -0.34006500 |
| 6 | -1.35281200 | 0.39935900  | -0.21380500 |
| 6 | 3.11962900  | -1.48271300 | -0.71098600 |
| 6 | 4.45440000  | -1.30886800 | -1.03797300 |
| 1 | 5.13371300  | -2.15114600 | -0.97555800 |
| 6 | 4.92509900  | -0.06925500 | -1.51321300 |
| 6 | 4.04111900  | 0.97366400  | -1.71087500 |
| 1 | 4.37098200  | 1.89816400  | -2.17417800 |
| 6 | 2.69353800  | 0.83545000  | -1.32791600 |
| 6 | 2.21335600  | -0.36465500 | -0.73415100 |
| 6 | 0.13003000  | 0.63190600  | -0.32652400 |
| 1 | 0.31116200  | 1.12792500  | -1.28342600 |
| 6 | 0.62282800  | 1.97417700  | 0.76668400  |
| 1 | 0.36546200  | 1.46104600  | 1.69471900  |
| 6 | 2.03172300  | 2.27661900  | 0.72004900  |
| 7 | 0.97067700  | -0.46637300 | -0.14412900 |
| 1 | 2.00478700  | 1.60609300  | -1.64059500 |
| 5 | 0.78814000  | -1.36857400 | 1.25703800  |
| 9 | 0.22535100  | -2.59233400 | 0.97249000  |
| 9 | 2.05435000  | -1.47393500 | 1.83596200  |
| 9 | -0.03095700 | -0.60057200 | 2.08206300  |
| 1 | 5.97102400  | 0.03324100  | -1.78596700 |

|   |            |             |             |
|---|------------|-------------|-------------|
| 6 | 3.35446700 | -3.69941200 | 0.14919600  |
| 1 | 4.04162200 | -4.14213900 | -0.58316400 |
| 1 | 3.91632800 | -3.31245300 | 1.00512100  |
| 1 | 2.64948500 | -4.45742000 | 0.49057400  |
| 8 | 2.55728500 | -2.67536000 | -0.43008800 |

TS-cf-B-16

E(RB3LYP) = -1460.529814 a.u.

|   |             |             |             |
|---|-------------|-------------|-------------|
| 8 | 3.34195200  | 0.55007100  | 1.31205700  |
| 6 | 1.99573600  | -0.03510900 | 1.24865800  |
| 6 | 1.25579300  | 0.71458100  | 2.38124700  |
| 6 | -0.24789100 | 0.90265200  | 2.16025400  |
| 6 | 2.13656600  | -1.52944700 | 1.56326400  |
| 1 | 1.72479400  | 1.70113700  | 2.47261600  |
| 1 | 1.43621000  | 0.19115700  | 3.32549000  |
| 1 | -0.66390900 | 1.44341100  | 3.01793400  |
| 1 | -0.76385900 | -0.06143200 | 2.09864500  |
| 1 | 1.16236700  | -1.99523500 | 1.70065000  |
| 1 | 2.72743700  | -1.63015100 | 2.47972700  |
| 1 | 2.64135000  | -2.05293700 | 0.74928900  |
| 6 | 3.68640900  | 0.14418100  | -1.02655300 |
| 6 | 4.58826800  | -0.04853800 | -2.08188200 |
| 1 | 4.20060800  | -0.16947400 | -3.09022600 |
| 6 | 5.96098900  | -0.08378000 | -1.84690600 |
| 1 | 6.65062600  | -0.24084800 | -2.67023700 |
| 6 | 6.44530900  | 0.09266700  | -0.54675900 |
| 1 | 7.51485400  | 0.07069800  | -0.35866700 |
| 6 | 5.56622500  | 0.28751900  | 0.51917200  |
| 1 | 5.92398600  | 0.42503000  | 1.53414500  |
| 6 | 4.19256500  | 0.29947800  | 0.27863700  |
| 6 | 2.25094900  | 0.29260100  | -1.19182000 |
| 1 | 1.87003300  | 0.46382300  | -2.19654900 |
| 6 | 1.40478900  | 0.23709500  | -0.14628500 |
| 6 | -0.05251600 | 0.57666600  | -0.39120400 |
| 6 | -0.46537000 | 1.69861300  | 0.86359400  |
| 7 | -1.04572900 | -0.42355300 | -0.43323000 |
| 5 | -0.75657700 | -2.03709300 | -0.28346600 |
| 9 | -1.74501000 | -2.67615800 | -1.01747300 |
| 9 | 0.49328500  | -2.25565500 | -0.83514400 |
| 9 | -0.78220800 | -2.39782800 | 1.06594000  |
| 6 | -1.69484600 | 3.69787200  | -0.07599300 |
| 1 | -1.50012100 | 4.50341100  | 0.64970000  |
| 1 | -0.89639200 | 3.74419100  | -0.82235000 |
| 1 | -2.65300900 | 3.91880300  | -0.55247400 |
| 6 | -2.93389800 | 2.11071900  | 1.47818700  |
| 1 | -3.85091500 | 2.27163600  | 0.90153700  |
| 1 | -2.94328800 | 1.10702100  | 1.90269700  |
| 1 | -2.95785100 | 2.83111400  | 2.31299000  |
| 1 | -0.07249600 | 1.22493900  | -1.26919500 |
| 1 | 0.34987000  | 2.41327100  | 0.70179100  |
| 6 | -2.30212000 | 0.01657800  | -0.79617900 |
| 6 | -3.48193200 | -0.61913400 | -0.26356300 |
| 6 | -4.74357400 | -0.23930300 | -0.69580000 |
| 6 | -3.79886100 | 1.54183700  | -2.02817600 |
| 6 | -4.90675400 | 0.84112600  | -1.57991800 |
| 1 | -5.61618200 | -0.73987100 | -0.29097600 |
| 1 | -3.91085300 | 2.38181500  | -2.70646700 |
| 6 | -1.71624000 | 2.38719300  | 0.65592100  |
| 1 | -5.90593500 | 1.12885900  | -1.89310100 |
| 6 | -2.51588200 | 1.14097500  | -1.62954100 |
| 1 | -1.66775000 | 1.61784800  | -2.10381000 |

|   |             |             |             |
|---|-------------|-------------|-------------|
| 8 | -3.28309600 | -1.47824700 | 0.75585000  |
| 6 | -4.11523100 | -2.62925100 | 0.87484500  |
| 1 | -5.11350100 | -2.37415200 | 1.25211000  |
| 1 | -4.19046800 | -3.14131100 | -0.08802400 |
| 1 | -3.60897600 | -3.27699600 | 1.59033800  |

*trans-16-B***E (RB3LYP) = -1460.580656 a.u.**

|   |             |             |             |
|---|-------------|-------------|-------------|
| 6 | 5.03085000  | -2.32086500 | -1.15822900 |
| 6 | 5.87888500  | -1.21537000 | -1.05498700 |
| 6 | 5.36983500  | 0.03828800  | -0.71121100 |
| 6 | 4.00372900  | 0.18117300  | -0.47329100 |
| 6 | 3.13121700  | -0.91644800 | -0.58227800 |
| 6 | 3.66519500  | -2.16536500 | -0.92422800 |
| 8 | 3.52761500  | 1.43265300  | -0.20114900 |
| 6 | 2.25664000  | 1.59690900  | 0.48760200  |
| 6 | 1.27446700  | 0.47712200  | 0.15146800  |
| 6 | 1.71197100  | -0.68983800 | -0.34304800 |
| 6 | 1.74822000  | 2.95706900  | -0.04189700 |
| 6 | 0.25479200  | 3.22361900  | 0.19877800  |
| 6 | -0.59216600 | 2.05427500  | -0.33513000 |
| 6 | -0.17351500 | 0.80982400  | 0.47276500  |
| 6 | 2.55151900  | 1.62562300  | 1.99757800  |
| 6 | -2.12924400 | 2.23937400  | -0.35219600 |
| 6 | -2.67246700 | 0.94432900  | -1.03924000 |
| 6 | -2.11537900 | -0.32690200 | -0.41150500 |
| 7 | -1.05194500 | -0.36952200 | 0.33632700  |
| 6 | -4.17671600 | 0.90138500  | -1.19330900 |
| 6 | -4.86789800 | -0.24731000 | -1.13883200 |
| 6 | -4.19479200 | -1.51703000 | -0.95144400 |
| 6 | -2.86651000 | -1.57128500 | -0.67085600 |
| 6 | -2.49649000 | 3.46945900  | -1.20421000 |
| 6 | -2.72829600 | 2.39494700  | 1.05980500  |
| 1 | 5.43102100  | -3.29535900 | -1.41992400 |
| 1 | 6.94391200  | -1.32684800 | -1.23687100 |
| 1 | 6.01159600  | 0.90900000  | -0.62579200 |
| 1 | 2.99364300  | -3.01637800 | -1.00109000 |
| 1 | 1.02566100  | -1.50930500 | -0.52052300 |
| 1 | 1.93618600  | 2.95779500  | -1.12120200 |
| 1 | 2.35869900  | 3.75895100  | 0.38719000  |
| 1 | -0.01158800 | 4.15850400  | -0.30304900 |
| 1 | 0.05461000  | 3.37378800  | 1.26713500  |
| 1 | -0.29030000 | 1.89295100  | -1.38122400 |
| 1 | -0.21856600 | 1.06717700  | 1.53511600  |
| 1 | 1.65284700  | 1.83192600  | 2.58566000  |
| 1 | 3.29437100  | 2.40022700  | 2.21121000  |
| 1 | 2.94420600  | 0.65834900  | 2.32124200  |
| 1 | -4.67473400 | 1.83226600  | -1.43678000 |
| 1 | -4.76135100 | -2.43316700 | -1.07169500 |
| 1 | -3.57844000 | 3.59082500  | -1.30257500 |
| 1 | -2.07001900 | 3.40299900  | -2.21173900 |
| 1 | -2.12177100 | 4.38587600  | -0.74149000 |
| 1 | -3.81446300 | 2.51482300  | 1.00235300  |
| 1 | -2.32409800 | 3.28177400  | 1.55696900  |
| 1 | -2.52950600 | 1.52968900  | 1.69804800  |
| 5 | -0.84232200 | -1.55003700 | 1.60308600  |
| 9 | -2.12861300 | -1.89974300 | 1.95599700  |
| 9 | -0.22175900 | -0.80808600 | 2.58588400  |
| 9 | -0.07840700 | -2.59419700 | 1.15740200  |
| 1 | -2.27996100 | 0.95583600  | -2.07533800 |
| 1 | -5.94215500 | -0.25288800 | -1.29651200 |

|   |             |             |             |
|---|-------------|-------------|-------------|
| 8 | -2.11010700 | -2.68000500 | -0.60003200 |
| 6 | -2.74484900 | -3.92582200 | -0.33203100 |
| 1 | -3.33252300 | -4.27036100 | -1.19206400 |
| 1 | -1.93513700 | -4.62750800 | -0.13489900 |
| 1 | -3.38196000 | -3.84004100 | 0.55358300  |

*cis-16-B***E(RB3LYP) = -1460.572111 a.u.**

|   |             |             |             |
|---|-------------|-------------|-------------|
| 8 | 3.16215500  | 0.96826000  | 1.34585000  |
| 6 | 1.74940300  | 0.61224700  | 1.23063100  |
| 6 | 1.04071900  | 1.81221400  | 1.87986400  |
| 6 | -0.45124200 | 1.89391100  | 1.55256300  |
| 6 | 1.53361200  | -0.67764000 | 2.03461100  |
| 1 | 1.53712600  | 2.71919800  | 1.51570200  |
| 1 | 1.19848400  | 1.77628300  | 2.96307800  |
| 1 | -0.85713000 | 2.78334800  | 2.04016300  |
| 1 | -0.98748700 | 1.03592800  | 1.97394300  |
| 1 | 0.48141000  | -0.96873000 | 2.05226200  |
| 1 | 1.88695700  | -0.52173300 | 3.05923500  |
| 1 | 2.08247600  | -1.50590700 | 1.58403900  |
| 6 | 3.67426100  | -0.03320700 | -0.78139100 |
| 6 | 4.64945400  | -0.55061100 | -1.64413100 |
| 1 | 4.34832000  | -0.88840800 | -2.63240300 |
| 6 | 5.98262400  | -0.63454800 | -1.24708100 |
| 1 | 6.72799400  | -1.04172300 | -1.92293600 |
| 6 | 6.35361900  | -0.18646300 | 0.02406000  |
| 1 | 7.39135400  | -0.24527600 | 0.33957800  |
| 6 | 5.39963500  | 0.33175000  | 0.90078100  |
| 1 | 5.66865700  | 0.68497600  | 1.89073600  |
| 6 | 4.06559400  | 0.39964900  | 0.49948700  |
| 6 | 2.27663200  | 0.13178200  | -1.14723900 |
| 1 | 1.99397300  | -0.03995500 | -2.18109900 |
| 6 | 1.34331900  | 0.45547700  | -0.23731900 |
| 6 | -0.10848200 | 0.68188400  | -0.64089600 |
| 6 | -0.65505200 | 1.97938500  | 0.02567700  |
| 7 | -0.97896700 | -0.47864600 | -0.28956100 |
| 6 | -1.99754300 | 3.24257100  | -1.70728700 |
| 1 | -1.57290000 | 4.21464500  | -1.43660300 |
| 1 | -1.35533400 | 2.80025800  | -2.47659900 |
| 1 | -2.98012500 | 3.42505500  | -2.15607300 |
| 6 | -2.92155800 | 3.07145700  | 0.61126100  |
| 1 | -3.88553400 | 3.39089500  | 0.20692400  |
| 1 | -3.11982400 | 2.44485100  | 1.48472600  |
| 1 | -2.39661900 | 3.97060600  | 0.94812500  |
| 1 | -0.13400900 | 0.79361200  | -1.73293000 |
| 1 | 0.00252000  | 2.78461100  | -0.32633300 |
| 6 | -2.25994100 | -0.23166000 | -0.20642600 |
| 6 | -3.16170800 | -1.16830900 | 0.45272300  |
| 6 | -2.82470700 | 0.99415600  | -0.89011900 |
| 6 | -4.51124100 | -1.02702400 | 0.30475200  |
| 6 | -4.31786500 | 1.05535700  | -0.94686000 |
| 1 | -2.49852000 | 0.82482600  | -1.93172000 |
| 6 | -5.08524500 | 0.07701800  | -0.43207500 |
| 1 | -5.18244000 | -1.72506200 | 0.79193500  |
| 1 | -4.76574700 | 1.90563500  | -1.45093900 |
| 6 | -2.09972700 | 2.33566200  | -0.46414300 |
| 5 | -0.46340400 | -2.04027200 | -0.81628200 |
| 9 | 0.18468100  | -1.70934300 | -1.99316500 |
| 9 | 0.34302200  | -2.60615900 | 0.12795400  |
| 9 | -1.61172900 | -2.75841200 | -1.07558300 |
| 8 | -2.53944600 | -2.05615600 | 1.25404400  |



|   |             |             |             |
|---|-------------|-------------|-------------|
| 1 | -6.16666200 | 0.12216500  | -0.51901400 |
| 6 | -3.22853200 | -3.25270400 | 1.59802300  |
| 1 | -2.49580100 | -3.87949000 | 2.10557400  |
| 1 | -4.06918000 | -3.05532800 | 2.27535300  |
| 1 | -3.58376700 | -3.75913900 | 0.69481100  |

17-B

**E(RB3LYP) = -1421.284620 a.u.**

|   |             |             |             |
|---|-------------|-------------|-------------|
| 8 | -3.12518200 | 0.51651300  | -1.67072400 |
| 6 | -1.81101200 | 1.01560100  | -1.25353800 |
| 6 | -2.09952800 | 2.21809100  | -0.31327400 |
| 6 | -0.94228200 | 3.16145800  | 0.06297700  |
| 6 | -1.19345000 | 1.47229700  | -2.57677000 |
| 6 | 2.21343900  | 2.45532400  | 2.29051900  |
| 6 | 1.83424100  | 4.38107300  | 0.66344300  |
| 1 | -2.55689100 | 1.83134900  | 0.60456600  |
| 1 | -2.87129900 | 2.80686300  | -0.82288300 |
| 1 | -1.41082900 | 4.02698900  | 0.55471500  |
| 1 | -0.48549400 | 3.57117000  | -0.84607600 |
| 1 | -0.23843100 | 1.98087900  | -2.43176500 |
| 1 | -1.87843400 | 2.17334400  | -3.06000800 |
| 1 | -1.04650100 | 0.62257700  | -3.24903200 |
| 1 | 3.20271300  | 2.24275500  | 1.86430500  |
| 1 | 1.79663700  | 1.51803900  | 2.66343400  |
| 1 | 2.38307300  | 3.12752400  | 3.14277800  |
| 1 | 1.95366700  | 5.15287200  | 1.43564300  |
| 1 | 1.18646000  | 4.79123400  | -0.11461000 |
| 1 | 2.83139000  | 4.22695800  | 0.23056700  |
| 6 | -3.20140900 | -0.97876300 | 0.21194500  |
| 6 | -3.98237300 | -1.77739900 | 1.06885400  |
| 1 | -3.48203100 | -2.36687200 | 1.83186900  |
| 6 | -5.36427400 | -1.80978300 | 0.94085700  |
| 1 | -5.96181100 | -2.41763800 | 1.61204400  |
| 6 | -5.98243000 | -1.06372900 | -0.07303900 |
| 1 | -7.06247300 | -1.09506100 | -0.18336100 |
| 6 | -5.23256100 | -0.27591400 | -0.94326000 |
| 1 | -5.69850600 | 0.30173800  | -1.73417000 |
| 6 | -3.84606500 | -0.21830200 | -0.78804700 |
| 6 | -1.76273800 | -1.00062700 | 0.20779800  |
| 1 | -1.26073600 | -1.80049700 | 0.73935900  |
| 6 | -1.04531000 | -0.11581900 | -0.54255400 |
| 6 | 3.30993400  | -2.00314800 | -0.82231200 |
| 6 | 4.62097800  | -1.95342100 | -1.30208700 |
| 1 | 5.14542000  | -2.88354000 | -1.50865200 |
| 6 | 5.24683200  | -0.72694400 | -1.52589800 |
| 6 | 4.56586100  | 0.46425000  | -1.28131400 |
| 1 | 5.04971400  | 1.42091200  | -1.44774700 |
| 6 | 3.25726400  | 0.41938300  | -0.79800200 |
| 6 | 2.62540000  | -0.80224200 | -0.56491700 |
| 6 | 0.37550500  | -0.24274800 | -0.75971700 |
| 1 | 0.74814000  | 0.22237100  | -1.66988900 |
| 6 | 0.10286000  | 2.57654700  | 0.98796400  |
| 1 | -0.17656400 | 1.66704400  | 1.51407300  |
| 6 | 1.30625200  | 3.10422500  | 1.27208000  |
| 7 | 1.28430400  | -0.84901900 | -0.04510000 |
| 1 | 2.71808500  | 1.33172700  | -0.56207600 |
| 5 | 1.11794400  | -1.47166200 | 1.50503400  |
| 9 | 0.41107500  | -2.65783700 | 1.41394300  |
| 9 | 2.39746700  | -1.63595700 | 1.96204900  |
| 9 | 0.41551200  | -0.50113800 | 2.20904800  |
| 1 | 6.26772900  | -0.70891900 | -1.89492100 |

|   |            |             |             |
|---|------------|-------------|-------------|
| 8 | 2.62968500 | -3.16353900 | -0.63449200 |
| 1 | 3.24379500 | -3.90822100 | -0.67152500 |

TS-tf-B-17

E(RB3LYP) = -1421.235729 a.u.

|   |             |             |             |
|---|-------------|-------------|-------------|
| 8 | -3.37673500 | 1.39426900  | 0.26830100  |
| 6 | -2.04500600 | 1.63131300  | -0.25863800 |
| 6 | -1.49156000 | 2.71880600  | 0.67006900  |
| 6 | -0.01411400 | 3.01832000  | 0.43050500  |
| 6 | -2.20258000 | 2.12629300  | -1.70969700 |
| 6 | 3.22012500  | 1.38664700  | 1.64288100  |
| 6 | 2.86237500  | 3.20934000  | -0.08772300 |
| 1 | -1.63937300 | 2.37897400  | 1.70083800  |
| 1 | -2.08908500 | 3.62757100  | 0.54187300  |
| 1 | 0.28765400  | 3.85545500  | 1.07110600  |
| 1 | 0.14057300  | 3.35767900  | -0.60031000 |
| 1 | -1.23758800 | 2.35770000  | -2.17084600 |
| 1 | -2.82248400 | 3.02795600  | -1.73238300 |
| 1 | -2.68469400 | 1.35532400  | -2.31640200 |
| 1 | 4.24088600  | 1.30353600  | 1.26041200  |
| 1 | 2.86576000  | 0.40917300  | 1.97213400  |
| 1 | 3.25826000  | 2.03822000  | 2.53289900  |
| 1 | 2.81788900  | 4.08999900  | 0.57343200  |
| 1 | 2.30340900  | 3.46823500  | -0.98967600 |
| 1 | 3.91152600  | 3.05271200  | -0.34685700 |
| 6 | -3.26345100 | -0.92236000 | -0.36842300 |
| 6 | -3.95143400 | -2.11059400 | -0.65456800 |
| 1 | -3.37863800 | -3.00598400 | -0.88060800 |
| 6 | -5.34349000 | -2.15032700 | -0.63757300 |
| 1 | -5.86445700 | -3.07597200 | -0.86038600 |
| 6 | -6.06505400 | -0.99518100 | -0.32041400 |
| 1 | -7.15058900 | -1.02133300 | -0.29940800 |
| 6 | -5.40306600 | 0.19939800  | -0.03366700 |
| 1 | -5.94533100 | 1.10492600  | 0.21726100  |
| 6 | -4.01028100 | 0.23184500  | -0.06755700 |
| 6 | -1.81481800 | -0.82895300 | -0.30988100 |
| 1 | -1.24255100 | -1.74922100 | -0.33176000 |
| 6 | -1.19600600 | 0.36252000  | -0.20430300 |
| 6 | 3.10628900  | -1.92311700 | -0.58079000 |
| 6 | 4.42387300  | -1.88156500 | -1.02440200 |
| 1 | 5.00303800  | -2.79370600 | -0.92820000 |
| 6 | 4.97387500  | -0.73534600 | -1.61081700 |
| 6 | 4.18085600  | 0.38336300  | -1.80908800 |
| 1 | 4.55729900  | 1.24532700  | -2.35057600 |
| 6 | 2.85824800  | 0.38247700  | -1.34352700 |
| 6 | 2.29939200  | -0.72940500 | -0.64916300 |
| 6 | 0.30519300  | 0.49767000  | -0.28630900 |
| 1 | 0.52703600  | 0.91956200  | -1.26893600 |
| 6 | 0.87595800  | 1.80386500  | 0.74417800  |
| 1 | 0.61933300  | 1.36054100  | 1.70882300  |
| 6 | 2.30468600  | 2.03080100  | 0.65217800  |
| 7 | 1.05064700  | -0.66508900 | -0.04682000 |
| 1 | 2.22317300  | 1.19325300  | -1.66680700 |
| 5 | 0.80430100  | -1.44632700 | 1.36192200  |
| 9 | 0.33827300  | -2.74508500 | 1.03920600  |
| 9 | 2.02370600  | -1.53244000 | 2.02173900  |
| 9 | -0.11356900 | -0.74235000 | 2.10943900  |
| 1 | 6.00270200  | -0.75297100 | -1.95743300 |

|   |            |             |             |
|---|------------|-------------|-------------|
| 8 | 2.66102700 | -3.12194600 | -0.16602300 |
| 1 | 1.75013900 | -3.09426200 | 0.18863400  |

TS-cf-B-17

E(RB3LYP) = -1421.228901 a.u.

|   |             |             |             |
|---|-------------|-------------|-------------|
| 8 | 3.18106400  | 0.92092300  | 1.14572000  |
| 6 | 1.84938000  | 0.31407000  | 1.22673700  |
| 6 | 1.09236200  | 1.29430500  | 2.14930600  |
| 6 | -0.42512400 | 1.30697500  | 1.95040100  |
| 6 | 2.01625800  | -1.05582800 | 1.89851800  |
| 1 | 1.48382200  | 2.29838500  | 1.94826700  |
| 1 | 1.34047700  | 1.06154000  | 3.18959600  |
| 1 | -0.87085400 | 2.01261300  | 2.65999200  |
| 1 | -0.86117000 | 0.32350000  | 2.15515600  |
| 1 | 1.05322100  | -1.49037400 | 2.16416200  |
| 1 | 2.61348400  | -0.91775100 | 2.80557100  |
| 1 | 2.52203600  | -1.75912000 | 1.23576600  |
| 6 | 3.52374800  | 0.03436600  | -1.05788900 |
| 6 | 4.42526100  | -0.35101200 | -2.05936600 |
| 1 | 4.03618900  | -0.69545900 | -3.01410300 |
| 6 | 5.79960600  | -0.29473300 | -1.83896900 |
| 1 | 6.48927300  | -0.60175200 | -2.61874700 |
| 6 | 6.28508900  | 0.16620500  | -0.61104200 |
| 1 | 7.35571200  | 0.21609000  | -0.43520600 |
| 6 | 5.40622300  | 0.55625600  | 0.40009600  |
| 1 | 5.76490900  | 0.91637100  | 1.35855400  |
| 6 | 4.03188800  | 0.47780100  | 0.17807400  |
| 6 | 2.08272600  | 0.08959000  | -1.23127600 |
| 1 | 1.68876900  | 0.01125100  | -2.24254600 |
| 6 | 1.24551700  | 0.23572100  | -0.18810500 |
| 6 | -0.23490300 | 0.41626600  | -0.47003600 |
| 6 | -0.73142900 | 1.72564700  | 0.50557600  |
| 7 | -1.12958700 | -0.66781500 | -0.28085800 |
| 5 | -0.72846200 | -2.17047100 | 0.10765900  |
| 9 | -1.63097600 | -3.00147400 | -0.52001100 |
| 9 | 0.57146400  | -2.42825600 | -0.23947000 |
| 9 | -0.90041100 | -2.29336300 | 1.53797500  |
| 6 | -2.15984900 | 3.28193800  | -0.88121900 |
| 1 | -2.02914800 | 4.27116400  | -0.41435500 |
| 1 | -1.38202800 | 3.18482600  | -1.64385200 |
| 1 | -3.14314400 | 3.27730900  | -1.35723300 |
| 6 | -3.21594500 | 2.11603200  | 1.10759700  |
| 1 | -4.15210800 | 2.02240400  | 0.54622000  |
| 1 | -3.13150700 | 1.28749000  | 1.81014000  |
| 1 | -3.29519300 | 3.05065500  | 1.68797900  |
| 1 | -0.31371200 | 0.84652600  | -1.47221500 |
| 1 | 0.00219700  | 2.46428000  | 0.15939100  |
| 6 | -2.45121900 | -0.42455500 | -0.64303700 |
| 6 | -3.54124100 | -0.94938900 | 0.14385600  |
| 6 | -2.79194400 | 0.36961000  | -1.76563800 |
| 6 | -4.85469600 | -0.69381900 | -0.24966900 |
| 6 | -4.11180300 | 0.62236500  | -2.13668300 |
| 6 | -5.14468300 | 0.08414700  | -1.37243000 |
| 1 | -5.64612700 | -1.09714000 | 0.37292400  |
| 1 | -4.32212700 | 1.21277700  | -3.02251400 |
| 6 | -2.04746100 | 2.23698300  | 0.18823000  |
| 1 | -6.18057400 | 0.25972000  | -1.64762500 |
| 1 | -1.99609600 | 0.71296800  | -2.41627500 |

|   |             |             |            |
|---|-------------|-------------|------------|
| 8 | -3.38897000 | -1.58574200 | 1.31293400 |
| 1 | -2.46089300 | -1.86846200 | 1.48479600 |

*trans-17-B***E (RB3LYP) = -1421.281259 a.u.**

|   |             |             |             |
|---|-------------|-------------|-------------|
| 6 | 5.09455700  | -2.04002400 | -1.30004200 |
| 6 | 5.85777000  | -0.88069000 | -1.14032500 |
| 6 | 5.25828400  | 0.31121400  | -0.72976100 |
| 6 | 3.88698400  | 0.33818100  | -0.48147900 |
| 6 | 3.09889200  | -0.81503200 | -0.64540700 |
| 6 | 3.72278900  | -2.00050600 | -1.05481000 |
| 8 | 3.32049800  | 1.53521100  | -0.14480900 |
| 6 | 2.04384600  | 1.57138300  | 0.55068900  |
| 6 | 1.14667700  | 0.39887000  | 0.15995300  |
| 6 | 1.66845100  | -0.70599900 | -0.39104500 |
| 6 | 1.43436200  | 2.91575200  | 0.08901500  |
| 6 | -0.07792500 | 3.05734700  | 0.32321400  |
| 6 | -0.82422400 | 1.84968200  | -0.27292900 |
| 6 | -0.31810900 | 0.61685100  | 0.49936600  |
| 6 | 2.33997500  | 1.54705200  | 2.06079100  |
| 6 | -2.36902300 | 1.90144100  | -0.32135400 |
| 6 | -2.77646900 | 0.57924100  | -1.05825400 |
| 6 | -2.20457200 | -0.66444000 | -0.38033200 |
| 7 | -1.12550200 | -0.61536300 | 0.36706200  |
| 6 | -4.23800900 | 0.48908600  | -1.40788000 |
| 6 | -4.89515700 | -0.68182800 | -1.39575500 |
| 6 | -4.20984700 | -1.89791000 | -1.05233400 |
| 6 | -2.91320700 | -1.93365500 | -0.62198000 |
| 6 | -2.81616900 | 3.12352000  | -1.14651400 |
| 6 | -3.01966900 | 1.96255700  | 1.07494700  |
| 1 | 5.56488500  | -2.96634300 | -1.61425500 |
| 1 | 6.92688600  | -0.90194500 | -1.33040700 |
| 1 | 5.83319000  | 1.22223800  | -0.60056400 |
| 1 | 3.11755900  | -2.89505200 | -1.17675200 |
| 1 | 1.04621400  | -1.56687200 | -0.60803500 |
| 1 | 1.63090600  | 2.98935900  | -0.98613900 |
| 1 | 1.97802700  | 3.73737700  | 0.56749700  |
| 1 | -0.40875800 | 3.99087200  | -0.14099700 |
| 1 | -0.30045200 | 3.14395700  | 1.39427900  |
| 1 | -0.49021000 | 1.75552900  | -1.31674500 |
| 1 | -0.36541200 | 0.85833200  | 1.56610300  |
| 1 | 1.43287800  | 1.67721700  | 2.65747800  |
| 1 | 3.03778900  | 2.35287100  | 2.30737800  |
| 1 | 2.78710400  | 0.59028200  | 2.34163300  |
| 1 | -4.71467000 | 1.38960500  | -1.77390100 |
| 1 | -4.71333700 | -2.85271400 | -1.16290800 |
| 1 | -3.90419700 | 3.20094800  | -1.20681500 |
| 1 | -2.41832100 | 3.09139800  | -2.16741400 |
| 1 | -2.46535900 | 4.04764800  | -0.68096200 |
| 1 | -4.11029600 | 1.97389600  | 0.98374700  |
| 1 | -2.72193100 | 2.87410700  | 1.60190100  |
| 1 | -2.75466000 | 1.10729600  | 1.70258900  |
| 5 | -0.80202600 | -1.72446800 | 1.57339400  |
| 9 | -2.01764300 | -2.02710600 | 2.13280300  |
| 9 | 0.06589600  | -1.12458800 | 2.44407100  |
| 9 | -0.21705700 | -2.85253000 | 0.95159600  |
| 1 | -2.26845300 | 0.61651700  | -2.04267600 |
| 1 | -5.93625900 | -0.73921500 | -1.69779300 |



|   |             |             |             |
|---|-------------|-------------|-------------|
| 8 | -2.35005300 | -3.14277800 | -0.47197200 |
| 1 | -1.48003500 | -3.12142700 | -0.02128900 |

*cis*-17-B**E(RB3LYP) = -1421.264563 a.u.**

|   |             |             |             |
|---|-------------|-------------|-------------|
| 8 | -3.01593500 | -1.23110800 | 1.15288600  |
| 6 | -1.62478800 | -0.78300800 | 1.14097000  |
| 6 | -0.85978000 | -2.03285200 | 1.60688500  |
| 6 | 0.64134500  | -1.97678100 | 1.31600100  |
| 6 | -1.50404600 | 0.36750400  | 2.14992400  |
| 1 | -1.29393000 | -2.89307400 | 1.08409100  |
| 1 | -1.04163100 | -2.18531100 | 2.67609500  |
| 1 | 1.08981800  | -2.91099700 | 1.66189900  |
| 1 | 1.11603400  | -1.17253900 | 1.88990000  |
| 1 | -0.46990000 | 0.70056800  | 2.25810600  |
| 1 | -1.88155600 | 0.03041900  | 3.12084600  |
| 1 | -2.08071000 | 1.23132700  | 1.81616000  |
| 6 | -3.54105900 | 0.07476300  | -0.79852500 |
| 6 | -4.52567600 | 0.67387700  | -1.59513900 |
| 1 | -4.22312100 | 1.18504400  | -2.50542700 |
| 6 | -5.86957300 | 0.62013600  | -1.23060300 |
| 1 | -6.62274200 | 1.09239800  | -1.85335300 |
| 6 | -6.24077200 | -0.04988700 | -0.06115500 |
| 1 | -7.28665800 | -0.09941100 | 0.22796900  |
| 6 | -5.27742300 | -0.65307200 | 0.74851400  |
| 1 | -5.54714800 | -1.17763900 | 1.65914100  |
| 6 | -3.93334100 | -0.58200700 | 0.38292000  |
| 6 | -2.12869100 | 0.04862600  | -1.14305900 |
| 1 | -1.83531700 | 0.40213000  | -2.12637000 |
| 6 | -1.19729900 | -0.36545300 | -0.26857200 |
| 6 | 0.27353800  | -0.43742700 | -0.65654500 |
| 6 | 0.88415600  | -1.79469100 | -0.19707600 |
| 7 | 1.06303600  | 0.69602200  | -0.09090000 |
| 6 | 2.34033100  | -2.67443700 | -2.07108300 |
| 1 | 1.97683000  | -3.70274400 | -1.97671300 |
| 1 | 1.68488200  | -2.15193200 | -2.77610600 |
| 1 | 3.34137300  | -2.71715400 | -2.51390800 |
| 6 | 3.19957800  | -2.83673600 | 0.27321400  |
| 1 | 4.19206300  | -3.02705900 | -0.14355300 |
| 1 | 3.33476900  | -2.35453500 | 1.24487700  |
| 1 | 2.72506300  | -3.80889800 | 0.43850900  |
| 1 | 0.33097700  | -0.36331100 | -1.75070300 |
| 1 | 0.28485300  | -2.56536800 | -0.69871300 |
| 6 | 2.35514500  | 0.51407900  | -0.01418600 |
| 6 | 3.18697000  | 1.36812600  | 0.82160200  |
| 6 | 3.00850500  | -0.54820900 | -0.87149400 |
| 6 | 4.54438900  | 1.30158200  | 0.71998500  |
| 6 | 4.50371300  | -0.52093100 | -0.88906700 |
| 1 | 2.69624700  | -0.22821700 | -1.88138300 |
| 6 | 5.20435600  | 0.38266300  | -0.17919000 |
| 1 | 5.15369100  | 1.92351100  | 1.37136200  |
| 1 | 5.00971400  | -1.24360400 | -1.52105300 |
| 6 | 2.35790300  | -1.98177500 | -0.69346800 |
| 5 | 0.46484900  | 2.29800600  | -0.37571700 |
| 9 | -0.14764600 | 2.12152800  | -1.60357300 |
| 9 | -0.38361600 | 2.65953800  | 0.62812200  |
| 9 | 1.57921300  | 3.09739000  | -0.49184800 |
| 8 | 2.51798400  | 2.08727600  | 1.75309000  |

|   |            |            |             |
|---|------------|------------|-------------|
| 1 | 3.05951900 | 2.82799900 | 2.05572500  |
| 1 | 6.28854600 | 0.40623100 | -0.22974900 |

## 18-B

**E(RB3LYP) = -3917.170524 a.u.**

|    |             |             |             |
|----|-------------|-------------|-------------|
| 8  | -1.53427600 | 1.95740600  | -1.69802500 |
| 6  | -0.21172800 | 1.90586500  | -1.06655100 |
| 6  | -0.29799000 | 2.82106900  | 0.18623200  |
| 6  | 1.01336800  | 3.32930500  | 0.81623300  |
| 6  | 0.69963200  | 2.49891700  | -2.14176900 |
| 6  | 3.96246200  | 1.24564800  | 2.36470700  |
| 6  | 4.09523300  | 3.49909300  | 1.19460100  |
| 1  | -0.89040000 | 2.30390400  | 0.94939800  |
| 1  | -0.88186000 | 3.69377800  | -0.12931700 |
| 1  | 0.70863000  | 4.04205100  | 1.59752600  |
| 1  | 1.56396300  | 3.93002000  | 0.08396500  |
| 1  | 1.72778500  | 2.60214500  | -1.78972000 |
| 1  | 0.33190100  | 3.49253100  | -2.40960300 |
| 1  | 0.68887300  | 1.87860500  | -3.04225200 |
| 1  | 4.82229900  | 0.88423400  | 1.78645500  |
| 1  | 3.32244200  | 0.38889000  | 2.58462400  |
| 1  | 4.36729400  | 1.62532900  | 3.31284800  |
| 1  | 4.52325000  | 4.00291900  | 2.07151800  |
| 1  | 3.55962000  | 4.25255800  | 0.61332300  |
| 1  | 4.94844700  | 3.14977800  | 0.59869800  |
| 6  | -2.28233200 | 0.06477100  | -0.41481600 |
| 6  | -3.35964000 | -0.68896900 | 0.08423200  |
| 1  | -3.16485400 | -1.59606200 | 0.64583600  |
| 6  | -4.65944400 | -0.26443100 | -0.14533000 |
| 6  | -4.91657500 | 0.89004300  | -0.89348700 |
| 1  | -5.93966900 | 1.20139200  | -1.07096600 |
| 6  | -3.85931300 | 1.63850900  | -1.40287900 |
| 1  | -4.03763900 | 2.53330400  | -1.98895000 |
| 6  | -2.54494500 | 1.24018100  | -1.14992900 |
| 6  | -0.91126000 | -0.36983300 | -0.32382200 |
| 1  | -0.71512800 | -1.39816000 | -0.04157500 |
| 6  | 0.11035200  | 0.45028800  | -0.69211700 |
| 6  | 3.54883200  | -2.81955400 | -0.82703900 |
| 1  | 2.75440200  | -3.51616200 | -0.58597400 |
| 6  | 4.77790500  | -3.26173500 | -1.30927200 |
| 1  | 4.94497000  | -4.32564400 | -1.44649300 |
| 6  | 5.79060700  | -2.34848000 | -1.61270300 |
| 1  | 6.74884500  | -2.70023200 | -1.98234500 |
| 6  | 5.57079600  | -0.98360100 | -1.42662800 |
| 1  | 6.35922200  | -0.26866800 | -1.64159100 |
| 6  | 4.34174900  | -0.52874800 | -0.94800100 |
| 6  | 3.32937300  | -1.44842100 | -0.65910400 |
| 6  | 1.45809600  | -0.04919800 | -0.84115500 |
| 1  | 2.04595700  | 0.40481700  | -1.63723400 |
| 6  | 1.89742000  | 2.27524500  | 1.44064500  |
| 1  | 1.38181100  | 1.40123800  | 1.83321800  |
| 6  | 3.22797400  | 2.34077800  | 1.62684500  |
| 7  | 2.03800500  | -1.01682500 | -0.19060100 |
| 1  | 4.17794300  | 0.52854000  | -0.76515600 |
| 5  | 1.48907300  | -1.76603000 | 1.20607500  |
| 9  | 0.72457800  | -2.84077200 | 0.77098100  |
| 9  | 2.62601500  | -2.13703800 | 1.87488600  |
| 9  | 0.75017100  | -0.83009600 | 1.90208300  |
| 35 | -6.12501800 | -1.27347800 | 0.55019700  |

TS-tf-B-18

E(RB3LYP) = -3917.123514 a.u.

|    |             |             |             |
|----|-------------|-------------|-------------|
| 8  | -1.68823600 | 2.54085000  | 0.32759000  |
| 6  | -0.38178600 | 2.29238300  | -0.25837400 |
| 6  | 0.54510500  | 3.19857500  | 0.56165400  |
| 6  | 2.02335300  | 2.99383900  | 0.23950800  |
| 6  | -0.45797300 | 2.71469600  | -1.73838700 |
| 6  | 4.63319700  | 0.46759300  | 1.41181700  |
| 6  | 4.76606600  | 2.21805700  | -0.43263300 |
| 1  | 0.36193600  | 2.98578200  | 1.62033500  |
| 1  | 0.25966700  | 4.24161200  | 0.38845700  |
| 1  | 2.61468300  | 3.72451900  | 0.80416900  |
| 1  | 2.21178400  | 3.20793800  | -0.81886000 |
| 1  | 0.50078100  | 2.59406200  | -2.25148800 |
| 1  | -0.75960300 | 3.76412700  | -1.81184900 |
| 1  | -1.19532900 | 2.10183200  | -2.26358100 |
| 1  | 5.55542300  | 0.04628300  | 1.00365700  |
| 1  | 4.00293800  | -0.32810100 | 1.81436800  |
| 1  | 4.91735200  | 1.11489100  | 2.25939000  |
| 1  | 5.02314500  | 3.11605800  | 0.15268100  |
| 1  | 4.26329500  | 2.57010400  | -1.33613300 |
| 1  | 5.70432300  | 1.73276100  | -0.70851200 |
| 6  | -2.35311900 | 0.26464400  | -0.07401300 |
| 6  | -3.39369100 | -0.66386900 | -0.21523700 |
| 1  | -3.16158500 | -1.71223300 | -0.36741200 |
| 6  | -4.71515100 | -0.23694000 | -0.14646700 |
| 6  | -5.02941400 | 1.10426500  | 0.07421100  |
| 1  | -6.06509600 | 1.41858300  | 0.13068800  |
| 6  | -4.00117400 | 2.03634600  | 0.21514000  |
| 1  | -4.21691100 | 3.08475700  | 0.39070900  |
| 6  | -2.67412900 | 1.61909200  | 0.13265500  |
| 6  | -0.94909700 | -0.11136900 | -0.08150900 |
| 1  | -0.69900800 | -1.16505500 | -0.03032400 |
| 6  | 0.01711900  | 0.82478800  | -0.12321000 |
| 6  | 3.38875800  | -2.67294800 | -0.36101000 |
| 1  | 2.75962800  | -3.31660400 | 0.23778900  |
| 6  | 4.57825800  | -3.13774700 | -0.87523000 |
| 1  | 4.88022600  | -4.16021700 | -0.66851900 |
| 6  | 5.40528300  | -2.31347800 | -1.66957200 |
| 1  | 6.34063100  | -2.69731700 | -2.06467100 |
| 6  | 4.98037500  | -1.03639700 | -1.98217500 |
| 1  | 5.56643800  | -0.41173600 | -2.65042000 |
| 6  | 3.76622800  | -0.53809500 | -1.47264600 |
| 6  | 2.95973200  | -1.33653600 | -0.61223700 |
| 6  | 1.47430300  | 0.46566000  | -0.28480300 |
| 1  | 1.74627800  | 0.73227200  | -1.30924300 |
| 6  | 2.50048100  | 1.57832700  | 0.60204300  |
| 1  | 2.18697000  | 1.29438200  | 1.60986900  |
| 6  | 3.91580700  | 1.32156000  | 0.41680600  |
| 7  | 1.84039500  | -0.84860400 | 0.02242200  |
| 1  | 3.39883300  | 0.38808200  | -1.88983900 |
| 5  | 1.41455900  | -1.49740300 | 1.47508600  |
| 9  | 0.57756000  | -2.57310500 | 1.22717100  |
| 9  | 2.59057100  | -1.90436700 | 2.10884800  |
| 9  | 0.81634800  | -0.48340700 | 2.20769100  |
| 35 | -6.12851300 | -1.51123200 | -0.34987800 |

**TS-cf-B-18****E(RB3LYP) = -3917.114683 a.u.**

|    |             |             |             |
|----|-------------|-------------|-------------|
| 8  | 1.63814500  | 2.23286700  | 0.38913000  |
| 6  | 0.38259900  | 1.63645100  | 0.86726000  |
| 6  | -0.62530300 | 2.78943200  | 0.66285200  |
| 6  | -2.06635800 | 2.34505400  | 0.40912000  |
| 6  | 0.56826500  | 1.34469500  | 2.36302500  |
| 1  | -0.27961900 | 3.37720800  | -0.19528400 |
| 1  | -0.58016700 | 3.44917600  | 1.53474600  |
| 1  | -2.69863800 | 3.23697400  | 0.33009600  |
| 1  | -2.44989300 | 1.74908000  | 1.24404900  |
| 1  | -0.38024800 | 1.09365500  | 2.83534300  |
| 1  | 0.97942000  | 2.24684900  | 2.82741100  |
| 1  | 1.25080700  | 0.50986400  | 2.52462100  |
| 6  | 2.49275300  | 0.08700300  | -0.24648800 |
| 6  | 3.60124600  | -0.72585700 | -0.51627100 |
| 1  | 3.45579900  | -1.74727100 | -0.85147600 |
| 6  | 4.88432300  | -0.21429900 | -0.35678700 |
| 6  | 5.09002600  | 1.10331200  | 0.05447900  |
| 1  | 6.09775900  | 1.48588200  | 0.16901500  |
| 6  | 3.99180400  | 1.91919500  | 0.32524600  |
| 1  | 4.12427600  | 2.94689500  | 0.64575000  |
| 6  | 2.70094500  | 1.41003000  | 0.18714600  |
| 6  | 1.11628700  | -0.31657500 | -0.47654700 |
| 1  | 0.94304200  | -1.21095500 | -1.07100400 |
| 6  | 0.07734500  | 0.38585000  | 0.01463500  |
| 6  | -1.30907800 | -0.04902500 | -0.41171000 |
| 6  | -2.11837800 | 1.54337600  | -0.89582300 |
| 7  | -2.15303600 | -0.75918100 | 0.42762600  |
| 5  | -1.83054600 | -1.10226800 | 1.99832800  |
| 9  | -2.47702900 | -2.28513100 | 2.29558400  |
| 9  | -0.46436500 | -1.24170800 | 2.11314500  |
| 9  | -2.33166400 | -0.03683600 | 2.76162100  |
| 6  | -3.33609600 | 1.36506900  | -3.09407400 |
| 1  | -3.40124800 | 2.39979700  | -3.46363700 |
| 1  | -2.40925800 | 0.94298800  | -3.49353600 |
| 1  | -4.18959200 | 0.82254400  | -3.50756900 |
| 6  | -4.67181200 | 1.67309700  | -0.94713500 |
| 1  | -5.45659000 | 1.00911200  | -1.32412400 |
| 1  | -4.63715100 | 1.60366900  | 0.13935900  |
| 1  | -4.97309800 | 2.69920200  | -1.21239500 |
| 1  | -1.23632200 | -0.47708000 | -1.41064300 |
| 1  | -1.32811100 | 1.83820200  | -1.59264200 |
| 6  | -3.36300100 | -1.17065800 | -0.11203000 |
| 6  | -4.48380400 | -1.39687200 | 0.73892100  |
| 6  | -3.57232100 | -1.28042400 | -1.50877200 |
| 6  | -5.71659400 | -1.71368000 | 0.20760900  |
| 1  | -4.36306000 | -1.29508700 | 1.80678700  |
| 6  | -4.82542500 | -1.63980600 | -2.02915900 |
| 1  | -2.73424900 | -1.23637900 | -2.19228200 |
| 6  | -5.90376600 | -1.83803700 | -1.18401100 |
| 1  | -6.55785900 | -1.86207600 | 0.87804400  |
| 1  | -4.93838400 | -1.75893000 | -3.10290800 |
| 6  | -3.35078500 | 1.38993100  | -1.59050800 |
| 1  | -6.87760300 | -2.10440700 | -1.58319400 |
| 35 | 6.39540300  | -1.33047900 | -0.72376100 |

*trans-18-B***E(RB3LYP) = -3917.168977 a.u.**

|    |             |             |             |
|----|-------------|-------------|-------------|
| 6  | 4.56786400  | -0.19791800 | -0.42586400 |
| 6  | 4.89876200  | 1.15585000  | -0.44228600 |
| 6  | 3.89020800  | 2.10901400  | -0.29536200 |
| 6  | 2.56679900  | 1.70133700  | -0.13765200 |
| 6  | 2.22946800  | 0.33541800  | -0.13110400 |
| 6  | 3.24880500  | -0.61387700 | -0.27390800 |
| 8  | 1.60334100  | 2.66469600  | -0.06267000 |
| 6  | 0.31450400  | 2.36001400  | 0.54234700  |
| 6  | -0.09251400 | 0.90853000  | 0.30414000  |
| 6  | 0.82417200  | -0.02272200 | 0.00690500  |
| 6  | -0.64587200 | 3.34291200  | -0.16875000 |
| 6  | -2.13769700 | 2.98132500  | -0.06993800 |
| 6  | -2.35095300 | 1.52422100  | -0.51592200 |
| 6  | -1.57634200 | 0.65114900  | 0.49656000  |
| 6  | 0.43106300  | 2.64387200  | 2.05039800  |
| 6  | -3.80045400 | 1.02441300  | -0.74064200 |
| 6  | -3.60866200 | -0.43950200 | -1.27640300 |
| 6  | -2.81135300 | -1.28963500 | -0.29593500 |
| 7  | -1.91764200 | -0.77842600 | 0.50601100  |
| 6  | -4.85723300 | -1.11271200 | -1.78518300 |
| 6  | -5.10305800 | -2.42004700 | -1.60275900 |
| 6  | -4.16217600 | -3.23964600 | -0.86374700 |
| 6  | -3.07385700 | -2.71888200 | -0.25021300 |
| 6  | -4.48835800 | 1.89402500  | -1.80870200 |
| 6  | -4.64836400 | 1.02346200  | 0.54639900  |
| 1  | 5.93068200  | 1.46436900  | -0.56263000 |
| 1  | 4.11827300  | 3.16947400  | -0.30467000 |
| 1  | 3.00384900  | -1.67038900 | -0.26372700 |
| 1  | 0.54924800  | -1.06888400 | -0.07741100 |
| 1  | -0.35682500 | 3.34648900  | -1.22534000 |
| 1  | -0.46683200 | 4.35413200  | 0.21169400  |
| 1  | -2.69899000 | 3.67444800  | -0.70340100 |
| 1  | -2.50736100 | 3.12194400  | 0.95357300  |
| 1  | -1.84950000 | 1.42211400  | -1.48976700 |
| 1  | -1.83290500 | 0.99668500  | 1.50555800  |
| 1  | -0.53244400 | 2.54362900  | 2.55807600  |
| 1  | 0.79892300  | 3.66316000  | 2.20181100  |
| 1  | 1.12559400  | 1.94039000  | 2.51603400  |
| 1  | -5.52287000 | -0.51233900 | -2.39521200 |
| 1  | -5.98670400 | -2.88457600 | -2.02880700 |
| 1  | -4.34460100 | -4.30843200 | -0.79736800 |
| 1  | -2.39105700 | -3.34194400 | 0.30919400  |
| 1  | -5.51002200 | 1.56116800  | -2.00935100 |
| 1  | -3.93457200 | 1.88845500  | -2.75470000 |
| 1  | -4.56040300 | 2.93077200  | -1.47067900 |
| 1  | -5.65097400 | 0.63410100  | 0.34178600  |
| 1  | -4.76271700 | 2.04026000  | 0.93408600  |
| 1  | -4.21258400 | 0.40697500  | 1.33762000  |
| 5  | -1.36961800 | -1.64168500 | 1.84085400  |
| 9  | -2.51110800 | -2.13623400 | 2.43771400  |
| 9  | -0.71739200 | -0.72574800 | 2.63198600  |
| 9  | -0.54564400 | -2.64241100 | 1.34864400  |
| 1  | -2.96982500 | -0.34282100 | -2.17472100 |
| 35 | 5.95109300  | -1.50724000 | -0.62274300 |

*cis*-18-B**E(RB3LYP) = -3917.161627 a.u.**

|    |             |             |             |
|----|-------------|-------------|-------------|
| 8  | 1.67946900  | 2.36351100  | 0.18519900  |
| 6  | 0.39929500  | 1.83179900  | 0.66131200  |
| 6  | -0.59303800 | 2.95703400  | 0.32312700  |
| 6  | -2.04628300 | 2.48032100  | 0.31978700  |
| 6  | 0.52543500  | 1.63218000  | 2.17815500  |
| 1  | -0.33114500 | 3.34498300  | -0.66841400 |
| 1  | -0.45256300 | 3.77679400  | 1.03490600  |
| 1  | -2.70165900 | 3.33579300  | 0.12184300  |
| 1  | -2.32266400 | 2.08251800  | 1.30075500  |
| 1  | -0.43068100 | 1.36202400  | 2.62577200  |
| 1  | 0.88413000  | 2.56701100  | 2.62073600  |
| 1  | 1.22878000  | 0.83025400  | 2.40740400  |
| 6  | 2.47259000  | 0.15580400  | -0.31880400 |
| 6  | 3.55977000  | -0.70163400 | -0.52976600 |
| 1  | 3.38717800  | -1.73673900 | -0.80462100 |
| 6  | 4.85624300  | -0.21902000 | -0.38805900 |
| 6  | 5.09736600  | 1.11365900  | -0.05337200 |
| 1  | 6.11474200  | 1.47363800  | 0.04812800  |
| 6  | 4.02061800  | 1.97475600  | 0.15791300  |
| 1  | 4.18016400  | 3.01546600  | 0.41861700  |
| 6  | 2.71611200  | 1.49657100  | 0.03750200  |
| 6  | 1.08658400  | -0.22757500 | -0.52831000 |
| 1  | 0.89038400  | -1.15834100 | -1.05646400 |
| 6  | 0.06905400  | 0.53859000  | -0.09786600 |
| 6  | -1.35507900 | 0.16078700  | -0.48864600 |
| 6  | -2.24618800 | 1.40914400  | -0.76284700 |
| 7  | -2.08409700 | -0.85151200 | 0.34334400  |
| 1  | -1.23289500 | -0.34385900 | -1.45512100 |
| 1  | -1.83983300 | 1.82315400  | -1.69667000 |
| 6  | -3.21465300 | -1.25649400 | -0.19933900 |
| 6  | -4.04160000 | -2.29770200 | 0.36889900  |
| 6  | -3.71734800 | -0.52752600 | -1.43140800 |
| 6  | -5.21197700 | -2.65053800 | -0.22395300 |
| 1  | -3.70210000 | -2.78974400 | 1.26549400  |
| 6  | -5.00153200 | -1.03299400 | -2.00308300 |
| 1  | -2.96597300 | -0.61837500 | -2.23437600 |
| 6  | -5.70430600 | -2.02728300 | -1.43142700 |
| 1  | -5.80126600 | -3.44624900 | 0.22344800  |
| 1  | -5.33860000 | -0.57675400 | -2.92825900 |
| 1  | -6.63002300 | -2.38361500 | -1.87229600 |
| 6  | -3.73141000 | 1.02150500  | -1.05510900 |
| 5  | -1.63682600 | -1.15267600 | 1.91888800  |
| 9  | -0.26712400 | -1.18533200 | 1.96921700  |
| 9  | -2.19060500 | -0.06461300 | 2.59742700  |
| 9  | -2.17150000 | -2.35263700 | 2.34533800  |
| 6  | -4.67009300 | 1.23798800  | 0.15169700  |
| 1  | -4.79917300 | 2.30556200  | 0.34886400  |
| 1  | -5.65973700 | 0.82256400  | -0.06279500 |
| 1  | -4.29233400 | 0.77558600  | 1.06616500  |
| 6  | -4.24390500 | 1.85665500  | -2.24187300 |
| 1  | -3.70616400 | 1.62215300  | -3.16774500 |
| 1  | -5.31317000 | 1.70482300  | -2.41580500 |
| 1  | -4.09590700 | 2.92176400  | -2.03572800 |
| 35 | 6.33647700  | -1.40078500 | -0.66966600 |



## 19-B

 $E(\text{RB3LYP}) = -1267.428057 \text{ a.u.}$ 

|   |             |             |             |
|---|-------------|-------------|-------------|
| 8 | -2.83191700 | 1.05318500  | -1.31423000 |
| 6 | -1.59082900 | 1.45401600  | -0.64824700 |
| 6 | -2.01851400 | 2.14645500  | 0.67608600  |
| 6 | -0.99901700 | 3.06144300  | 1.38390000  |
| 6 | -0.97424200 | 2.44594900  | -1.63366900 |
| 1 | -2.35445500 | 1.37158200  | 1.37363600  |
| 1 | -2.89856500 | 2.75135800  | 0.42833700  |
| 1 | -1.50617900 | 3.43281900  | 2.28657700  |
| 1 | -0.79321500 | 3.94950800  | 0.77437600  |
| 1 | -0.05909400 | 2.88958500  | -1.23665500 |
| 1 | -1.68941800 | 3.25016000  | -1.82386600 |
| 1 | -0.75330000 | 1.95690500  | -2.58648800 |
| 6 | -2.81587900 | -1.05888400 | -0.15974800 |
| 6 | -3.53885600 | -2.18716900 | 0.27065800  |
| 1 | -3.00626900 | -2.98435600 | 0.78144800  |
| 6 | -4.90643700 | -2.27737600 | 0.04893600  |
| 1 | -5.46048200 | -3.14366200 | 0.39474400  |
| 6 | -5.56495400 | -1.24819900 | -0.63900800 |
| 1 | -6.63270200 | -1.32028300 | -0.82406200 |
| 6 | -4.87092700 | -0.12695100 | -1.08793400 |
| 1 | -5.36797200 | 0.67332400  | -1.62540000 |
| 6 | -3.50249400 | -0.02339500 | -0.83093300 |
| 6 | -1.38228700 | -0.95840200 | -0.07502000 |
| 1 | -0.81584400 | -1.85692500 | 0.14300300  |
| 6 | -0.73788100 | 0.20308300  | -0.37872500 |
| 6 | 3.63023100  | -1.58657300 | -0.78273400 |
| 1 | 3.13841300  | -2.53535000 | -0.60203300 |
| 6 | 4.91969300  | -1.52769800 | -1.30387700 |
| 1 | 5.44461300  | -2.44985300 | -1.53382500 |
| 6 | 5.53768800  | -0.29475000 | -1.52833700 |
| 1 | 6.54589300  | -0.25558200 | -1.92919800 |
| 6 | 4.85941000  | 0.88512000  | -1.22360800 |
| 1 | 5.33973500  | 1.84686400  | -1.37667300 |
| 6 | 3.56468400  | 0.83828600  | -0.70495100 |
| 6 | 2.94908400  | -0.39885700 | -0.49610900 |
| 6 | 0.69366300  | 0.24195100  | -0.56497300 |
| 1 | 1.05455600  | 0.93610900  | -1.32256400 |
| 6 | 0.29753600  | 2.42068100  | 1.80263600  |
| 1 | 0.23138700  | 1.43837500  | 2.26752000  |
| 6 | 1.49627700  | 2.99296700  | 1.66099800  |
| 7 | 1.60443600  | -0.49205700 | 0.00993100  |
| 1 | 3.04645800  | 1.75149000  | -0.43010200 |
| 5 | 1.40378500  | -1.47256600 | 1.35355200  |
| 9 | 1.00803100  | -2.71062200 | 0.85777700  |
| 9 | 2.63046000  | -1.50415600 | 1.95852500  |
| 9 | 0.43410400  | -0.87580100 | 2.13711900  |
| 1 | 1.61263900  | 3.97487900  | 1.20532700  |
| 1 | 2.40011000  | 2.50983900  | 2.01963400  |

TS-tf-B-19

E(RB3LYP) = -1267.379887 a.u.

|   |             |             |             |
|---|-------------|-------------|-------------|
| 6 | -4.60213400 | 2.19142000  | 1.33209000  |
| 6 | -5.37136000 | 1.46518500  | 0.41642400  |
| 6 | -4.80283300 | 0.43626800  | -0.33468400 |
| 6 | -3.45104200 | 0.13927300  | -0.17053300 |
| 6 | -2.65296900 | 0.87185700  | 0.73003100  |
| 6 | -3.24969600 | 1.89675100  | 1.48072900  |
| 8 | -2.89503500 | -0.82433000 | -0.95968900 |
| 6 | -1.70996100 | -1.52349400 | -0.48170200 |
| 6 | -0.73644200 | -0.54046700 | 0.17082900  |
| 6 | -1.23931100 | 0.55396400  | 0.78281200  |
| 6 | -1.14678800 | -2.15396400 | -1.76582200 |
| 6 | 0.23801300  | -2.78117600 | -1.59899700 |
| 6 | 1.35149200  | -1.77243400 | -1.30823700 |
| 6 | 0.68142100  | -0.95482800 | 0.36898100  |
| 6 | -2.16454200 | -2.58733400 | 0.53384500  |
| 6 | 1.65035600  | -0.76154800 | -2.23164700 |
| 6 | 1.22791900  | 1.33737700  | -1.20295400 |
| 6 | 1.97076800  | 1.01364100  | -0.02665000 |
| 7 | 1.67565900  | -0.09340700 | 0.74033700  |
| 6 | 1.64843200  | 2.39481900  | -2.04206200 |
| 6 | 2.79644600  | 3.10249900  | -1.75924800 |
| 6 | 3.53357900  | 2.78887700  | -0.59506300 |
| 6 | 3.13827500  | 1.78028000  | 0.25552700  |
| 1 | -5.05442600 | 2.98527000  | 1.91745300  |
| 1 | -6.42551000 | 1.69467700  | 0.29224100  |
| 1 | -5.38551600 | -0.13714700 | -1.04769400 |
| 1 | -2.63672000 | 2.46234100  | 2.17746800  |
| 1 | -0.58113500 | 1.22020700  | 1.33375000  |
| 1 | -1.12158700 | -1.37299400 | -2.53413900 |
| 1 | -1.86074800 | -2.90635700 | -2.11636800 |
| 1 | 0.49213000  | -3.33366100 | -2.51093100 |
| 1 | 0.22150100  | -3.52613200 | -0.79602400 |
| 1 | 2.22774500  | -2.18845900 | -0.81623900 |
| 1 | 0.75128500  | -1.87725200 | 0.94145400  |
| 1 | -1.32204600 | -3.17525400 | 0.90799300  |
| 1 | -2.88208200 | -3.26643500 | 0.06367000  |
| 1 | -2.64448300 | -2.10952600 | 1.39179700  |
| 1 | 1.04022000  | 2.65050700  | -2.90480200 |
| 1 | 3.11867300  | 3.91370700  | -2.40483400 |
| 1 | 4.43098700  | 3.35394600  | -0.36129600 |
| 1 | 3.70911500  | 1.55246800  | 1.14392200  |
| 5 | 2.85447000  | -0.78903800 | 1.66999600  |
| 9 | 3.85383200  | -1.15618800 | 0.77746400  |
| 9 | 2.27056700  | -1.89352200 | 2.27077800  |
| 9 | 3.27243300  | 0.14126600  | 2.60147700  |
| 1 | 0.21511100  | 0.97982900  | -1.31403400 |
| 1 | 2.66690800  | -0.40970700 | -2.34537400 |
| 1 | 0.96966300  | -0.52214400 | -3.04232100 |

TS-cf-B-19

E(RB3LYP) = -1267.369909 a.u.

|   |             |             |             |
|---|-------------|-------------|-------------|
| 8 | 2.86882300  | 1.07156200  | 0.96228400  |
| 6 | 1.51840800  | 0.52428700  | 1.14438800  |
| 6 | 0.81544400  | 1.66423800  | 1.91613800  |
| 6 | -0.70209500 | 1.74643600  | 1.74764600  |
| 6 | 1.65911800  | -0.72431800 | 2.02514400  |
| 1 | 1.25798300  | 2.60660300  | 1.57396400  |
| 1 | 1.07199800  | 1.56558000  | 2.97542800  |
| 1 | -1.08372100 | 2.52517600  | 2.41877000  |
| 1 | -1.19275500 | 0.81040700  | 2.03814900  |
| 1 | 0.68977200  | -1.07602700 | 2.37588200  |
| 1 | 2.27939000  | -0.45415500 | 2.88589200  |
| 1 | 2.13285900  | -1.54153300 | 1.48023000  |
| 6 | 3.17700700  | -0.11005100 | -1.09837000 |
| 6 | 4.05989900  | -0.65509000 | -2.04098700 |
| 1 | 3.65582200  | -1.10630900 | -2.94355400 |
| 6 | 5.43551700  | -0.62082300 | -1.82618100 |
| 1 | 6.11202800  | -1.05087400 | -2.55776800 |
| 6 | 5.94024600  | -0.02271500 | -0.66662800 |
| 1 | 7.01248000  | 0.01034500  | -0.49684800 |
| 6 | 5.07969200  | 0.52775600  | 0.28380400  |
| 1 | 5.45412500  | 0.99669400  | 1.18751300  |
| 6 | 3.70284800  | 0.47168500  | 0.07028200  |
| 6 | 1.73924700  | -0.03316100 | -1.27197700 |
| 1 | 1.33765000  | -0.23047600 | -2.26390200 |
| 6 | 0.90607100  | 0.25440300  | -0.25012500 |
| 6 | -0.54826200 | 0.39056900  | -0.58571400 |
| 6 | -1.05246000 | 2.10858700  | 0.30712900  |
| 7 | -1.51205500 | -0.51217000 | -0.22374200 |
| 5 | -1.20772300 | -1.93363400 | 0.57778000  |
| 9 | -2.10375500 | -2.85321900 | 0.07564700  |
| 9 | 0.08856700  | -2.28361300 | 0.28462400  |
| 9 | -1.42277300 | -1.67987300 | 1.93369300  |
| 1 | -0.67004100 | 0.80415200  | -1.58444700 |
| 1 | -0.28595500 | 2.68903400  | -0.20819600 |
| 6 | -2.81749100 | -0.22385000 | -0.56632900 |
| 6 | -3.89415900 | -0.82252200 | 0.15446600  |
| 6 | -3.14144300 | 0.78807700  | -1.51361500 |
| 6 | -5.19661500 | -0.46746500 | -0.11430800 |
| 1 | -3.67473200 | -1.54272600 | 0.92779600  |
| 6 | -4.49248300 | 1.08938900  | -1.81256400 |
| 1 | -2.38820000 | 1.13193900  | -2.21212800 |
| 6 | -5.51081100 | 0.48391300  | -1.11248900 |
| 1 | -5.99701600 | -0.92734500 | 0.45737500  |
| 1 | -4.70848300 | 1.81562500  | -2.59030200 |
| 1 | -6.54742100 | 0.72662800  | -1.32463600 |
| 6 | -2.36152300 | 2.44150700  | -0.05306400 |
| 1 | -3.19134800 | 2.25804000  | 0.62108300  |
| 1 | -2.54727900 | 3.15532800  | -0.84684300 |

*trans*-19-B

**E (RB3LYP) = -1267.436371 a.u.**

|   |             |             |             |
|---|-------------|-------------|-------------|
| 6 | 4.66057100  | -2.22020200 | -1.26989100 |
| 6 | 5.48715700  | -1.10640900 | -1.10217900 |
| 6 | 4.95312000  | 0.11676500  | -0.69275800 |
| 6 | 3.58383500  | 0.22095800  | -0.45398400 |
| 6 | 2.73261400  | -0.88533400 | -0.62663700 |
| 6 | 3.29143600  | -2.10341700 | -1.03427800 |
| 8 | 3.08467400  | 1.44808100  | -0.11644200 |
| 6 | 1.80715400  | 1.55598600  | 0.57007100  |
| 6 | 0.84883800  | 0.43473100  | 0.16754600  |
| 6 | 1.30919200  | -0.69805200 | -0.38060800 |
| 6 | 1.28898200  | 2.94582300  | 0.11862700  |
| 6 | -0.21877300 | 3.17342200  | 0.31741100  |
| 6 | -1.00394800 | 2.00476100  | -0.28878000 |
| 6 | -0.60222200 | 0.73528700  | 0.49227600  |
| 6 | 2.08877100  | 1.50290300  | 2.08248800  |
| 6 | -2.51963000 | 2.14551900  | -0.35209600 |
| 6 | -3.05581100 | 0.89987300  | -1.08058400 |
| 6 | -2.59816100 | -0.36955900 | -0.37871500 |
| 7 | -1.50534500 | -0.42256500 | 0.33223600  |
| 6 | -4.52843300 | 0.93821700  | -1.38974800 |
| 6 | -5.29228800 | -0.16471300 | -1.35681500 |
| 6 | -4.70484900 | -1.43889300 | -0.97754300 |
| 6 | -3.43588700 | -1.55138700 | -0.51871900 |
| 1 | 5.07993800  | -3.17131700 | -1.58239600 |
| 1 | 6.55478600  | -1.18782700 | -1.28448400 |
| 1 | 5.57799100  | 0.99326900  | -0.55662600 |
| 1 | 2.63680600  | -2.96167400 | -1.16093500 |
| 1 | 0.63873300  | -1.52356200 | -0.59610900 |
| 1 | 1.51508600  | 3.02424600  | -0.95029200 |
| 1 | 1.87138700  | 3.72386400  | 0.62331400  |
| 1 | -0.50595500 | 4.11543300  | -0.16434300 |
| 1 | -0.46937900 | 3.27662400  | 1.38167200  |
| 1 | -0.65279700 | 1.88206600  | -1.32416300 |
| 1 | -0.65719500 | 0.97007500  | 1.56339500  |
| 1 | 1.18723400  | 1.69398800  | 2.67173400  |
| 1 | 2.83810300  | 2.25745800  | 2.34013900  |
| 1 | 2.46501900  | 0.51569300  | 2.36169600  |
| 1 | -4.92734600 | 1.89428800  | -1.71853100 |
| 1 | -6.34157000 | -0.12835900 | -1.63174900 |
| 1 | -5.31856600 | -2.33224300 | -1.05121600 |
| 1 | -3.02943300 | -2.50467600 | -0.21264200 |
| 5 | -1.25175500 | -1.70249000 | 1.39819800  |
| 9 | -2.45218200 | -1.87204200 | 2.05517600  |
| 9 | -0.24690400 | -1.28845500 | 2.23799200  |
| 9 | -0.91874400 | -2.79659000 | 0.61332000  |
| 1 | -2.56501000 | 0.88160500  | -2.07315700 |
| 1 | -2.80709700 | 3.05055500  | -0.89912000 |
| 1 | -2.96148900 | 2.21236500  | 0.64982900  |

*cis-19-B***E(RB3LYP) = -1267.431164 a.u.**

|   |             |             |             |
|---|-------------|-------------|-------------|
| 8 | -2.89389000 | -1.28695600 | 0.80036600  |
| 6 | -1.47791900 | -0.96053800 | 0.96092500  |
| 6 | -0.84618700 | -2.33431000 | 1.25931900  |
| 6 | 0.66904700  | -2.34940500 | 1.07106700  |
| 6 | -1.36278800 | -0.01597700 | 2.16551700  |
| 1 | -1.30101900 | -3.05851400 | 0.57360400  |
| 1 | -1.12072300 | -2.63892400 | 2.27454100  |
| 1 | 1.05489800  | -3.35466000 | 1.27812000  |
| 1 | 1.16360300  | -1.67457800 | 1.78182300  |
| 1 | -0.32312500 | 0.20058500  | 2.41937900  |
| 1 | -1.85169200 | -0.48545000 | 3.02507500  |
| 1 | -1.84417600 | 0.93865800  | 1.95126400  |
| 6 | -3.17131500 | 0.31241200  | -0.97467200 |
| 6 | -4.04625700 | 1.08483800  | -1.74957200 |
| 1 | -3.63914600 | 1.68902900  | -2.55639700 |
| 6 | -5.41595500 | 1.08450900  | -1.49336400 |
| 1 | -6.08353400 | 1.69101800  | -2.09709000 |
| 6 | -5.92371400 | 0.29514300  | -0.45733500 |
| 1 | -6.99050900 | 0.28727400  | -0.25328400 |
| 6 | -5.07099900 | -0.48261600 | 0.32710400  |
| 1 | -5.44752800 | -1.10282000 | 1.13368500  |
| 6 | -3.70011300 | -0.46659700 | 0.07123700  |
| 6 | -1.74049500 | 0.22503100  | -1.20941000 |
| 1 | -1.34695800 | 0.67173500  | -2.12028100 |
| 6 | -0.90919200 | -0.35772800 | -0.33036300 |
| 6 | 0.56791100  | -0.49307700 | -0.66368500 |
| 6 | 1.04347100  | -1.94893200 | -0.36325100 |
| 7 | 1.50419200  | 0.49809800  | -0.04572100 |
| 1 | 0.64752600  | -0.33573600 | -1.74958900 |
| 1 | 0.46369200  | -2.57923800 | -1.04856600 |
| 6 | 2.78084800  | 0.29194600  | -0.27702000 |
| 6 | 3.82029900  | 1.08483200  | 0.34686700  |
| 6 | 3.18436700  | -0.84011400 | -1.19421200 |
| 6 | 5.12588100  | 0.83940900  | 0.06942700  |
| 1 | 3.53807600  | 1.84560700  | 1.05819600  |
| 6 | 4.65135000  | -0.99022400 | -1.44014100 |
| 1 | 2.70399700  | -0.63914800 | -2.16783900 |
| 6 | 5.55919000  | -0.19537200 | -0.84838500 |
| 1 | 5.88568200  | 1.43466600  | 0.56805700  |
| 1 | 4.95261600  | -1.78941600 | -2.11240800 |
| 1 | 6.62099700  | -0.32430700 | -1.03296600 |
| 6 | 2.54490000  | -2.14923900 | -0.65286800 |
| 5 | 1.06651400  | 1.95493800  | 0.68590900  |
| 9 | -0.27557700 | 2.14400300  | 0.50030200  |
| 9 | 1.42936200  | 1.81097400  | 2.01717200  |
| 9 | 1.81575200  | 2.91596800  | 0.03548300  |
| 1 | 3.07878900  | -2.43149500 | 0.26045600  |
| 1 | 2.70792400  | -2.95245400 | -1.37792300 |

20-B

**E(RB3LYP) = -1192.408212 a.u.**

|   |             |             |             |
|---|-------------|-------------|-------------|
| 8 | -3.68396500 | -0.96437500 | -1.46489600 |
| 6 | -2.58802500 | -0.04854100 | -1.06417200 |
| 6 | -3.24515000 | 0.95088600  | -0.07582600 |
| 6 | -2.48551600 | 2.25107600  | 0.25190600  |
| 6 | -2.20942300 | 0.62490500  | -2.38248600 |
| 6 | 1.05372600  | 2.63241800  | 1.90956000  |
| 6 | -0.05785900 | 4.20166300  | 0.24171700  |
| 1 | -3.46387100 | 0.41742300  | 0.85541500  |
| 1 | -4.21036700 | 1.22168200  | -0.52053900 |
| 1 | -3.17617100 | 2.84974800  | 0.86514800  |
| 1 | -2.33984400 | 2.83680500  | -0.66234700 |
| 1 | -1.46540500 | 1.40966600  | -2.23444700 |
| 1 | -3.10135100 | 1.08274100  | -2.81767100 |
| 1 | -1.81922900 | -0.10666200 | -3.09531600 |
| 1 | 1.98566000  | 2.62453300  | 1.32971900  |
| 1 | 0.96675600  | 1.67089200  | 2.41915000  |
| 1 | 1.16906300  | 3.41870300  | 2.66818300  |
| 1 | -0.03635700 | 5.06352600  | 0.92205200  |
| 1 | -0.89425300 | 4.34795600  | -0.44539900 |
| 1 | 0.87305500  | 4.24961500  | -0.33829400 |
| 6 | -3.19011200 | -2.42741000 | 0.33793500  |
| 6 | -4.01169400 | -1.95663300 | -0.63420500 |
| 6 | -1.84039800 | -1.95727000 | 0.34552400  |
| 1 | -1.08506700 | -2.55136700 | 0.84587700  |
| 6 | -1.47106200 | -0.87131500 | -0.40489900 |
| 6 | 3.23170500  | -1.50093200 | -0.55601900 |
| 1 | 3.02141200  | -2.45312200 | -0.08286900 |
| 6 | 4.46139700  | -1.24899200 | -1.15838000 |
| 1 | 5.22560000  | -2.02025500 | -1.15346300 |
| 6 | 4.71480200  | -0.01559000 | -1.76400800 |
| 1 | 5.67753700  | 0.17675400  | -2.22754200 |
| 6 | 3.73015100  | 0.97213100  | -1.75940900 |
| 1 | 3.92511300  | 1.94041000  | -2.21067900 |
| 6 | 2.49355200  | 0.72909100  | -1.15999000 |
| 6 | 2.24190900  | -0.51253500 | -0.56865800 |
| 6 | -0.09902500 | -0.54977600 | -0.67675100 |
| 1 | 0.08651000  | -0.05170900 | -1.62658100 |
| 6 | -1.18942800 | 2.07518100  | 1.00736600  |
| 1 | -1.12993700 | 1.19313200  | 1.64115500  |
| 6 | -0.13911800 | 2.91416200  | 1.02650400  |
| 7 | 0.96880900  | -0.80966400 | 0.03228200  |
| 1 | 1.73696900  | 1.50659400  | -1.12132200 |
| 5 | 1.01760900  | -1.36924100 | 1.60025600  |
| 9 | 0.92816700  | -2.75496200 | 1.51565900  |
| 9 | 2.21603500  | -0.93818700 | 2.10582000  |
| 9 | -0.06378800 | -0.80786300 | 2.25853300  |
| 1 | -4.97172100 | -2.39994800 | -0.88372000 |
| 1 | -3.49841600 | -3.26428000 | 0.95103200  |

TS-tf-B-20

E(RB3LYP) = -1192.356364 a.u.

|   |             |             |             |
|---|-------------|-------------|-------------|
| 8 | 4.15597500  | -0.21443100 | 0.06911300  |
| 6 | 2.88134400  | -0.80311700 | -0.33944400 |
| 6 | 2.59357900  | -1.82442500 | 0.76810200  |
| 6 | 1.19510800  | -2.43096600 | 0.67607800  |
| 6 | 3.11504200  | -1.47160300 | -1.70690600 |
| 1 | 2.70988400  | -1.31071700 | 1.72848900  |
| 1 | 3.35287400  | -2.61284600 | 0.72951800  |
| 1 | 1.09140000  | -3.20422400 | 1.44668300  |
| 1 | 1.06797600  | -2.94447300 | -0.28436700 |
| 1 | 2.21220000  | -1.97249000 | -2.06942300 |
| 1 | 3.91753100  | -2.21266600 | -1.63413200 |
| 1 | 3.39850100  | -0.71731800 | -2.44531600 |
| 6 | 3.55647300  | 1.87027100  | -0.89058500 |
| 6 | 4.47627300  | 1.00392400  | -0.42899700 |
| 6 | 2.15666600  | 1.52042400  | -0.75959900 |
| 1 | 1.40794700  | 2.29462700  | -0.88012500 |
| 6 | 1.79241500  | 0.26473800  | -0.42431700 |
| 6 | -2.90383000 | 1.52046700  | -0.62258300 |
| 1 | -2.65123200 | 2.51949100  | -0.29579500 |
| 6 | -4.19976500 | 1.19784000  | -0.95363700 |
| 1 | -4.96983200 | 1.96024100  | -0.88101800 |
| 6 | -4.54437000 | -0.10146900 | -1.39111300 |
| 1 | -5.57314900 | -0.33626200 | -1.64589100 |
| 6 | -3.54816800 | -1.04460100 | -1.54598400 |
| 1 | -3.77984900 | -2.02534200 | -1.95201500 |
| 6 | -2.21129500 | -0.74073500 | -1.21792600 |
| 6 | -1.86604100 | 0.54487000  | -0.70674000 |
| 6 | 0.35239400  | -0.17137400 | -0.36778600 |
| 1 | 0.17294600  | -0.78360900 | -1.25573900 |
| 6 | 0.09706300  | -1.37262600 | 0.87376900  |
| 1 | 0.30025800  | -0.73967200 | 1.74140200  |
| 6 | -1.26677500 | -1.87235800 | 0.91895700  |
| 7 | -0.61021600 | 0.83878900  | -0.23600000 |
| 1 | -1.45283200 | -1.43543000 | -1.54864600 |
| 5 | -0.46059700 | 1.96061500  | 0.96114400  |
| 9 | -0.30546500 | 3.20032200  | 0.36278500  |
| 9 | -1.63018100 | 1.91050100  | 1.72459300  |
| 9 | 0.61921400  | 1.57786900  | 1.74087200  |
| 1 | 5.53897900  | 1.20987600  | -0.34864100 |
| 1 | 3.85768100  | 2.84414700  | -1.25552300 |
| 6 | -2.23258800 | -1.24652300 | 1.87549300  |
| 1 | -3.27108600 | -1.42384400 | 1.58374000  |
| 1 | -2.08336700 | -1.72224100 | 2.85981300  |
| 1 | -2.05992900 | -0.17619500 | 2.00482900  |
| 6 | -1.60276400 | -3.25510800 | 0.44329400  |
| 1 | -1.30943300 | -3.97661800 | 1.22308900  |
| 1 | -2.67662300 | -3.37103600 | 0.28305200  |
| 1 | -1.07081200 | -3.54655600 | -0.46532700 |

TS-cf-B-20

E(RB3LYP) = -1192.347797 a.u.

|   |             |             |             |
|---|-------------|-------------|-------------|
| 8 | -3.89544500 | -1.04538400 | 0.21926400  |
| 6 | -2.65416100 | -0.32900800 | 0.58576500  |
| 6 | -2.04224200 | -1.26158400 | 1.65387200  |
| 6 | -0.51747400 | -1.20947000 | 1.75253300  |
| 6 | -3.08755700 | 1.00357400  | 1.20742700  |
| 1 | -2.34708400 | -2.28546000 | 1.40841600  |
| 1 | -2.49133200 | -1.02365800 | 2.62333300  |
| 1 | -0.19675300 | -1.86286400 | 2.57241000  |
| 1 | -0.17226300 | -0.19801900 | 1.99197200  |
| 1 | -2.24343600 | 1.50323100  | 1.68160100  |
| 1 | -3.85451100 | 0.79117000  | 1.95988600  |
| 1 | -3.49364700 | 1.67804800  | 0.45323000  |
| 6 | -3.86023900 | -0.15939400 | -1.97266900 |
| 6 | -4.51677100 | -0.69392600 | -0.92591500 |
| 6 | -2.41988500 | -0.07348000 | -1.86919800 |
| 1 | -1.84203800 | 0.04987800  | -2.78239900 |
| 6 | -1.78463100 | -0.18432400 | -0.68242300 |
| 6 | -0.27761000 | -0.26590100 | -0.70529600 |
| 6 | 0.08785500  | -1.68912600 | 0.42905600  |
| 7 | 0.53068500  | 0.80773100  | -0.35529500 |
| 5 | -0.02715500 | 2.24776400  | 0.19980300  |
| 9 | 0.88166800  | 3.21135500  | -0.19412500 |
| 9 | -1.25732000 | 2.46475900  | -0.38036100 |
| 9 | -0.09631400 | 2.15044000  | 1.59760600  |
| 6 | 1.77709700  | -3.29018000 | -0.53374000 |
| 1 | 1.58460800  | -4.23770900 | -0.00781000 |
| 1 | 1.15853600  | -3.29695100 | -1.43608400 |
| 1 | 2.83216600  | -3.29038700 | -0.81805800 |
| 6 | 2.40322800  | -1.88566700 | 1.49601400  |
| 1 | 3.42634800  | -1.77329700 | 1.12307100  |
| 1 | 2.14243700  | -1.00845000 | 2.08700100  |
| 1 | 2.40552800  | -2.75837800 | 2.16859600  |
| 1 | 0.02767600  | -0.74460800 | -1.63552700 |
| 1 | -0.56920800 | -2.38863300 | -0.09488400 |
| 6 | 1.89789800  | 0.62524500  | -0.48279200 |
| 6 | 2.80042800  | 1.39981300  | 0.30446200  |
| 6 | 2.45400200  | -0.39122300 | -1.29938600 |
| 6 | 4.15798600  | 1.16390300  | 0.25338400  |
| 1 | 2.40605400  | 2.16136300  | 0.96000300  |
| 6 | 3.84288900  | -0.59008300 | -1.36701100 |
| 1 | 1.83211000  | -0.92105700 | -2.00885800 |
| 6 | 4.69733600  | 0.16463900  | -0.58319200 |
| 1 | 4.82049900  | 1.75662500  | 0.87721900  |
| 1 | 4.23694000  | -1.34568400 | -2.04066900 |
| 1 | 5.77055600  | 0.00516600  | -0.62257500 |
| 6 | 1.43330600  | -2.15037900 | 0.38633100  |
| 1 | -5.56882900 | -0.96401100 | -0.92745200 |
| 1 | -4.38084700 | 0.08425100  | -2.88989200 |



*trans-20-B***E(RB3LYP) = -1192.400372 a.u.**

|   |             |             |             |
|---|-------------|-------------|-------------|
| 6 | 4.20684500  | -0.52685000 | -1.53173500 |
| 6 | 3.26346600  | -1.46673600 | -1.69988000 |
| 8 | 4.00526700  | 0.62190300  | -0.83496100 |
| 6 | 2.90720900  | 0.67988000  | 0.13179300  |
| 6 | 1.73670400  | -0.20538500 | -0.29985500 |
| 6 | 1.94389500  | -1.23820400 | -1.13201000 |
| 6 | 2.52724800  | 2.17936500  | 0.14683100  |
| 6 | 1.12753900  | 2.48882000  | 0.70603000  |
| 6 | 0.07768600  | 1.61848900  | -0.00689100 |
| 6 | 0.42018900  | 0.15710600  | 0.36056200  |
| 6 | 3.46653200  | 0.20696400  | 1.48450900  |
| 6 | -1.42146300 | 1.94704800  | 0.20363300  |
| 6 | -2.15708500 | 0.93159200  | -0.74367200 |
| 6 | -1.79451000 | -0.50706700 | -0.39860300 |
| 7 | -0.64117000 | -0.83191300 | 0.11735300  |
| 6 | -3.63674600 | 1.15901400  | -0.91591300 |
| 6 | -4.52042500 | 0.15275600  | -1.01226600 |
| 6 | -4.06833500 | -1.22246600 | -0.92006600 |
| 6 | -2.78461200 | -1.54507900 | -0.63895900 |
| 6 | -1.70803500 | 3.39123000  | -0.24707600 |
| 6 | -1.88348800 | 1.76178700  | 1.66223900  |
| 1 | 1.13895400  | -1.92512600 | -1.37010700 |
| 1 | 2.56909500  | 2.52001300  | -0.89348700 |
| 1 | 3.29325700  | 2.73904500  | 0.69448300  |
| 1 | 0.92787400  | 3.55392600  | 0.55520100  |
| 1 | 1.09096200  | 2.31249200  | 1.78843600  |
| 1 | 0.25826600  | 1.73692900  | -1.08543800 |
| 1 | 0.57994100  | 0.11288300  | 1.44571400  |
| 1 | 2.73183800  | 0.32521200  | 2.28633300  |
| 1 | 4.35707200  | 0.78999900  | 1.73999200  |
| 1 | 3.73357500  | -0.85127500 | 1.43197200  |
| 1 | -3.96066700 | 2.18476800  | -1.05250000 |
| 1 | -5.57270300 | 0.35187400  | -1.18939800 |
| 1 | -4.79075100 | -2.01838500 | -1.07722600 |
| 1 | -2.46676300 | -2.57473600 | -0.56054700 |
| 1 | -2.76110800 | 3.65577400  | -0.11977100 |
| 1 | -1.44015300 | 3.54853400  | -1.29841900 |
| 1 | -1.13492200 | 4.10240200  | 0.35300700  |
| 1 | -2.95434900 | 1.97160500  | 1.75310500  |
| 1 | -1.35450100 | 2.45341300  | 2.32515400  |
| 1 | -1.71500500 | 0.74605800  | 2.02997400  |
| 5 | -0.44145200 | -2.31285500 | 0.88754800  |
| 9 | -1.54128300 | -2.42863500 | 1.71540900  |
| 9 | 0.73442200  | -2.21608100 | 1.59105900  |
| 9 | -0.41835700 | -3.27750000 | -0.10850400 |
| 1 | -1.73666900 | 1.11426000  | -1.75053800 |
| 1 | 3.47443200  | -2.35375200 | -2.28376800 |
| 1 | 5.19691600  | -0.55711000 | -1.97540400 |

*cis*-20-B**E(RB3LYP) = -1192.392673 a.u.**

|   |             |             |             |
|---|-------------|-------------|-------------|
| 8 | -3.91904000 | -1.07122900 | 0.31187300  |
| 6 | -2.60067800 | -0.50181000 | 0.64497600  |
| 6 | -1.94363200 | -1.61279900 | 1.48421100  |
| 6 | -0.41584100 | -1.52495900 | 1.52428800  |
| 6 | -2.86300100 | 0.75257400  | 1.48764200  |
| 1 | -2.23259000 | -2.57325200 | 1.04189200  |
| 1 | -2.35851100 | -1.59023700 | 2.49735200  |
| 1 | -0.04057900 | -2.34831700 | 2.13760200  |
| 1 | -0.09193800 | -0.59627200 | 2.00946800  |
| 1 | -1.93632200 | 1.16405500  | 1.89168200  |
| 1 | -3.52822200 | 0.48432500  | 2.31517300  |
| 1 | -3.32818400 | 1.53338400  | 0.88502600  |
| 6 | -3.95484400 | 0.02547900  | -1.78984000 |
| 6 | -4.57675300 | -0.57804100 | -0.76069300 |
| 6 | -2.50676700 | 0.06553500  | -1.76501400 |
| 1 | -1.97557700 | 0.30022400  | -2.68471500 |
| 6 | -1.81649500 | -0.21612800 | -0.64386200 |
| 6 | -0.30562900 | -0.34028000 | -0.68968000 |
| 6 | 0.15105900  | -1.60942100 | 0.09328900  |
| 7 | 0.50195200  | 0.83126300  | -0.22761600 |
| 6 | 1.88513100  | -3.15587900 | -0.90980600 |
| 1 | 1.42287200  | -4.01757400 | -0.41734100 |
| 1 | 1.41703200  | -3.04758800 | -1.89468700 |
| 1 | 2.94213400  | -3.39673100 | -1.06013000 |
| 6 | 2.40753000  | -2.09763500 | 1.30065900  |
| 1 | 3.47544700  | -2.26832200 | 1.14024700  |
| 1 | 2.30338900  | -1.23349600 | 1.96219100  |
| 1 | 2.01204100  | -2.97253000 | 1.82331900  |
| 1 | -0.04726200 | -0.48150900 | -1.74981300 |
| 1 | -0.36997600 | -2.43924400 | -0.39949300 |
| 6 | 1.80022900  | 0.63812800  | -0.22500300 |
| 6 | 2.72699200  | 1.60413900  | 0.32921300  |
| 6 | 2.34037700  | -0.65149700 | -0.79869800 |
| 6 | 4.06454700  | 1.40619500  | 0.22057800  |
| 1 | 2.33257500  | 2.47037700  | 0.83738800  |
| 6 | 3.83139700  | -0.71984100 | -0.91150800 |
| 1 | 1.94600000  | -0.70893200 | -1.82748700 |
| 6 | 4.63398300  | 0.25274200  | -0.44485700 |
| 1 | 4.74011300  | 2.13871900  | 0.65331000  |
| 1 | 4.24995500  | -1.59736700 | -1.39430100 |
| 1 | 5.71266400  | 0.18079200  | -0.54366000 |
| 6 | 1.69131700  | -1.89247900 | -0.04826600 |
| 5 | -0.08797800 | 2.35749000  | 0.13387100  |
| 9 | -1.36453800 | 2.45014400  | -0.35083800 |
| 9 | -0.00644000 | 2.45056500  | 1.51872900  |
| 9 | 0.75980500  | 3.24492600  | -0.50275000 |
| 1 | -4.51839700 | 0.37932000  | -2.64378600 |
| 1 | -5.64107900 | -0.79112600 | -0.72231000 |

21-B

**E(RB3LYP) = -1113.767045 a.u.**

|   |             |             |             |
|---|-------------|-------------|-------------|
| 8 | -3.57229200 | -0.10460800 | -1.60255200 |
| 6 | -2.53248500 | 0.57855700  | -0.79779700 |
| 6 | -3.24559600 | 0.98768500  | 0.51876600  |
| 6 | -2.58240000 | 2.07706600  | 1.38602900  |
| 6 | -2.17295600 | 1.79262700  | -1.65173900 |
| 1 | -3.39389700 | 0.08548800  | 1.12070300  |
| 1 | -4.24109600 | 1.34628100  | 0.23092400  |
| 1 | -3.23414700 | 2.19754300  | 2.26378300  |
| 1 | -2.60250900 | 3.04329700  | 0.86802700  |
| 1 | -1.46182300 | 2.44211400  | -1.13785400 |
| 1 | -3.07848400 | 2.37049300  | -1.85356500 |
| 1 | -1.74718200 | 1.48225800  | -2.60989900 |
| 6 | -3.03412000 | -2.19205000 | -0.60796500 |
| 6 | -3.86305200 | -1.37385100 | -1.30402700 |
| 6 | -1.70858700 | -1.72236400 | -0.34911400 |
| 1 | -0.93113200 | -2.44508100 | -0.13007800 |
| 6 | -1.38244900 | -0.40506300 | -0.53723700 |
| 6 | 3.32915800  | -0.84439000 | -0.74298700 |
| 1 | 3.12347800  | -1.90723700 | -0.68889000 |
| 6 | 4.57219100  | -0.36765700 | -1.14999800 |
| 1 | 5.35256700  | -1.07334800 | -1.41816300 |
| 6 | 4.81801000  | 1.00639600  | -1.21282300 |
| 1 | 5.79091100  | 1.37232800  | -1.52643000 |
| 6 | 3.81261100  | 1.90572700  | -0.85876000 |
| 1 | 4.00158800  | 2.97475900  | -0.88557400 |
| 6 | 2.56205300  | 1.43868200  | -0.45167000 |
| 6 | 2.31927600  | 0.06303100  | -0.40580700 |
| 6 | -0.01879600 | 0.04233300  | -0.60669000 |
| 1 | 0.17023100  | 0.88762300  | -1.26664100 |
| 6 | -1.18580400 | 1.78893600  | 1.87073400  |
| 1 | -0.99199200 | 0.78474400  | 2.24385800  |
| 6 | -0.20051800 | 2.69069000  | 1.89053100  |
| 7 | 1.03538900  | -0.45957600 | -0.01978900 |
| 1 | 1.78901100  | 2.13293700  | -0.13727700 |
| 5 | 1.04743000  | -1.58274000 | 1.21328300  |
| 9 | 1.01824000  | -2.83003100 | 0.59510700  |
| 9 | 2.20871900  | -1.35559600 | 1.90152300  |
| 9 | -0.08244600 | -1.34316500 | 1.97606900  |
| 1 | -4.79546300 | -1.69816000 | -1.75756500 |
| 1 | -3.31003600 | -3.22407600 | -0.43436600 |
| 1 | -0.34569900 | 3.70754100  | 1.52952400  |
| 1 | 0.77929400  | 2.44909300  | 2.29105400  |

TS-tf-B-21

E(RB3LYP) = -1113.711778 a.u.

|   |             |             |             |
|---|-------------|-------------|-------------|
| 8 | 4.02175300  | -0.20852400 | 0.04209300  |
| 6 | 2.73283300  | -0.86242100 | -0.20777500 |
| 6 | 2.52843200  | -1.70716300 | 1.06234100  |
| 6 | 1.14917900  | -2.35771200 | 1.19832800  |
| 6 | 2.91747400  | -1.72981600 | -1.46559400 |
| 1 | 2.69594900  | -1.04495500 | 1.91889100  |
| 1 | 3.31081200  | -2.47295500 | 1.09593300  |
| 1 | 1.15147600  | -2.97848300 | 2.10221500  |
| 1 | 0.95102600  | -3.04571700 | 0.36468100  |
| 1 | 2.01932900  | -2.31376500 | -1.68854400 |
| 1 | 3.75225400  | -2.42334200 | -1.32424400 |
| 1 | 3.12966500  | -1.09503700 | -2.32999100 |
| 6 | 3.32979700  | 1.77079300  | -1.07478000 |
| 6 | 4.28569200  | 0.96320300  | -0.57726100 |
| 6 | 1.94789700  | 1.40057000  | -0.87163500 |
| 1 | 1.16774500  | 2.12469600  | -1.07896400 |
| 6 | 1.62562000  | 0.17391700  | -0.40316800 |
| 6 | -3.20382300 | 0.89591500  | -0.60442900 |
| 1 | -3.05434800 | 1.96428600  | -0.52626700 |
| 6 | -4.46416000 | 0.36652800  | -0.74537400 |
| 1 | -5.31998300 | 1.03401500  | -0.77635300 |
| 6 | -4.66526500 | -1.03135300 | -0.85625300 |
| 1 | -5.66986500 | -1.42636400 | -0.97162700 |
| 6 | -3.57880300 | -1.87443900 | -0.86725200 |
| 1 | -3.71049400 | -2.94236600 | -1.01461700 |
| 6 | -2.26356800 | -1.36277600 | -0.71837800 |
| 6 | -2.05926800 | 0.04710300  | -0.57641700 |
| 6 | 0.22780400  | -0.30319900 | -0.29248700 |
| 1 | 0.08470200  | -1.15784200 | -0.95375000 |
| 6 | 0.02294600  | -1.33177900 | 1.30420400  |
| 1 | 0.23855500  | -0.48565000 | 1.95639000  |
| 6 | -1.31151600 | -1.79211100 | 1.36899800  |
| 7 | -0.82515300 | 0.57819900  | -0.29657800 |
| 1 | -1.45788100 | -2.01516800 | -1.03063300 |
| 5 | -0.81683600 | 1.89230700  | 0.74903400  |
| 9 | -0.96649700 | 3.02331600  | -0.03082600 |
| 9 | -1.88231600 | 1.68023200  | 1.61032800  |
| 9 | 0.37453900  | 1.84922400  | 1.44381100  |
| 1 | 5.34622300  | 1.19503500  | -0.56832100 |
| 1 | 3.59670100  | 2.71127900  | -1.53958700 |
| 1 | -1.53853100 | -2.84714900 | 1.25411100  |
| 1 | -2.06626900 | -1.18776700 | 1.85658300  |

TS-cf-B-21

E(RB3LYP) = -1113.711778 a.u.

|   |             |             |             |
|---|-------------|-------------|-------------|
| 8 | -3.81972700 | -0.84553800 | 0.21966400  |
| 6 | -2.52202400 | -0.26583100 | 0.58506000  |
| 6 | -2.05597500 | -1.19787600 | 1.72445200  |
| 6 | -0.53951900 | -1.29901500 | 1.88946000  |
| 6 | -2.79278600 | 1.14796900  | 1.11763200  |
| 1 | -2.45872100 | -2.19570400 | 1.51647700  |
| 1 | -2.51741300 | -0.86084200 | 2.65794500  |
| 1 | -0.32194500 | -1.92351100 | 2.76379500  |
| 1 | -0.09403700 | -0.31605400 | 2.07621200  |
| 1 | -1.90758500 | 1.56851700  | 1.59308500  |
| 1 | -3.60156300 | 1.07662000  | 1.85233800  |
| 1 | -3.09080800 | 1.82328300  | 0.31514100  |
| 6 | -3.60538500 | -0.09403100 | -2.04533700 |
| 6 | -4.40564400 | -0.43431600 | -0.93860100 |
| 6 | -2.16933100 | -0.21957800 | -1.87256100 |
| 1 | -1.55115400 | -0.23765600 | -2.76789300 |
| 6 | -1.60032600 | -0.31156700 | -0.65473500 |
| 6 | -0.10886300 | -0.56569100 | -0.61287400 |
| 6 | 0.05732900  | -1.93234100 | 0.62802600  |
| 7 | 0.80342700  | 0.43595200  | -0.31780300 |
| 5 | 0.40037300  | 1.96591800  | 0.11272900  |
| 9 | 1.41750800  | 2.78969800  | -0.32887400 |
| 9 | -0.78767100 | 2.26785800  | -0.51600600 |
| 9 | 0.29640500  | 1.98477200  | 1.51124100  |
| 1 | 0.16066000  | -1.14645600 | -1.49454200 |
| 1 | -0.65269600 | -2.59547900 | 0.12555000  |
| 6 | 2.14583300  | 0.09692700  | -0.38952200 |
| 6 | 3.10602300  | 0.81999600  | 0.37713800  |
| 6 | 2.60744600  | -1.02371700 | -1.12287900 |
| 6 | 4.43004300  | 0.43426200  | 0.38898000  |
| 1 | 2.78057600  | 1.66186000  | 0.96951100  |
| 6 | 3.96610900  | -1.37812400 | -1.12838200 |
| 1 | 1.94848600  | -1.53290900 | -1.81409500 |
| 6 | 4.87746400  | -0.67093600 | -0.36343200 |
| 1 | 5.13667900  | 0.99133300  | 0.99699600  |
| 1 | 4.29216800  | -2.21515400 | -1.73912200 |
| 1 | 5.92676800  | -0.94951900 | -0.35506300 |
| 6 | 1.34443100  | -2.53673700 | 0.67389700  |
| 1 | -4.03962200 | 0.15051700  | -2.88183300 |
| 1 | -5.37685200 | -0.44250900 | -1.00773400 |
| 1 | 2.03168700  | -2.35651600 | 1.47395900  |
| 1 | 1.52220400  | -3.41409300 | 0.08777200  |

*trans*-B-21

**E (RB3LYP) = -1113.770929 a.u.**

|   |             |             |             |
|---|-------------|-------------|-------------|
| 6 | 3.99041700  | -0.66270300 | -1.51278700 |
| 6 | 2.94076000  | -1.46546400 | -1.74612200 |
| 8 | 3.92776300  | 0.45133700  | -0.73814200 |
| 6 | 2.82840200  | 0.60005600  | 0.21761300  |
| 6 | 1.56781200  | -0.13108000 | -0.25558700 |
| 6 | 1.65608500  | -1.12191200 | -1.15665900 |
| 6 | 2.62631900  | 2.13519400  | 0.28207200  |
| 6 | 1.26800200  | 2.58605500  | 0.84422300  |
| 6 | 0.13603700  | 1.84958700  | 0.11902700  |
| 6 | 0.30066100  | 0.34567300  | 0.42809700  |
| 6 | 3.31527200  | 0.02113600  | 1.55704900  |
| 6 | -1.28703100 | 2.31116000  | 0.40515600  |
| 6 | -2.21364200 | 1.49409900  | -0.51336800 |
| 6 | -2.00992700 | 0.00369500  | -0.28689400 |
| 7 | -0.88481400 | -0.49187900 | 0.14930000  |
| 6 | -3.65402300 | 1.93051000  | -0.49937700 |
| 6 | -4.66518800 | 1.05524100  | -0.61040300 |
| 6 | -4.38132000 | -0.36662900 | -0.71389000 |
| 6 | -3.13541600 | -0.87601200 | -0.56775200 |
| 1 | 0.77782200  | -1.69462600 | -1.43315200 |
| 1 | 2.71441400  | 2.50002300  | -0.74700600 |
| 1 | 3.45046300  | 2.58198800  | 0.84849000  |
| 1 | 1.16540400  | 3.66940100  | 0.70966400  |
| 1 | 1.20132900  | 2.39750700  | 1.92403200  |
| 1 | 0.30156900  | 1.98488900  | -0.96013300 |
| 1 | 0.44856000  | 0.24149100  | 1.51155200  |
| 1 | 2.59393200  | 0.20074900  | 2.35960700  |
| 1 | 4.26619600  | 0.48658400  | 1.83464600  |
| 1 | 3.45649900  | -1.05895000 | 1.47111900  |
| 1 | -3.83246900 | 3.00229200  | -0.47184900 |
| 1 | -5.69640900 | 1.39161700  | -0.64825900 |
| 1 | -5.20864400 | -1.04567400 | -0.89992000 |
| 1 | -2.95172400 | -1.93969800 | -0.61840400 |
| 5 | -0.83721600 | -2.05949300 | 0.76521000  |
| 9 | -1.94624900 | -2.16331300 | 1.57907400  |
| 9 | 0.33873300  | -2.14505600 | 1.46878200  |
| 9 | -0.90454100 | -2.90716900 | -0.33048300 |
| 1 | -1.87533700 | 1.68536800  | -1.55020500 |
| 1 | 3.04656000  | -2.32910400 | -2.39048900 |
| 1 | 4.97373900  | -0.78466400 | -1.95595100 |
| 1 | -1.40312100 | 3.38083600  | 0.19687700  |
| 1 | -1.56189400 | 2.14810000  | 1.45462500  |

*cis*-B-21**E(RB3LYP) = -1113.767741 a.u.**

|   |             |             |             |
|---|-------------|-------------|-------------|
| 8 | -3.84781500 | -0.91246800 | 0.14963600  |
| 6 | -2.51608000 | -0.44510800 | 0.58065600  |
| 6 | -2.02457400 | -1.59303500 | 1.48432400  |
| 6 | -0.50197800 | -1.65422600 | 1.60307000  |
| 6 | -2.74194100 | 0.84055900  | 1.38546800  |
| 1 | -2.38490100 | -2.53117000 | 1.04668500  |
| 1 | -2.49222000 | -1.49906700 | 2.46977000  |
| 1 | -0.21800400 | -2.49534400 | 2.24679300  |
| 1 | -0.10251000 | -0.74537600 | 2.07126300  |
| 1 | -1.82139700 | 1.16983600  | 1.86826100  |
| 1 | -3.50139200 | 0.64353500  | 2.14955000  |
| 1 | -3.07994900 | 1.65024100  | 0.73742300  |
| 6 | -3.65928600 | 0.22970000  | -1.91706800 |
| 6 | -4.39485500 | -0.34114100 | -0.94486500 |
| 6 | -2.21929900 | 0.12302300  | -1.80923700 |
| 1 | -1.61755200 | 0.30275900  | -2.69750600 |
| 6 | -1.62329700 | -0.24057900 | -0.65653500 |
| 6 | -0.13818200 | -0.55781600 | -0.64491600 |
| 6 | 0.12820000  | -1.82823600 | 0.21425600  |
| 7 | 0.83923000  | 0.52437600  | -0.26420200 |
| 5 | 0.35985000  | 2.03200800  | 0.27397600  |
| 9 | 1.31541700  | 2.95380100  | -0.11906700 |
| 9 | -0.84877300 | 2.31822500  | -0.30466500 |
| 9 | 0.29860500  | 1.89007100  | 1.65592900  |
| 1 | 0.11597000  | -0.80207200 | -1.68534900 |
| 1 | -0.40222200 | -2.63792300 | -0.30283100 |
| 6 | 2.10354400  | 0.16253000  | -0.31253400 |
| 6 | 3.19984000  | 1.02972400  | 0.07210600  |
| 6 | 2.43040700  | -1.26457200 | -0.70335000 |
| 6 | 4.48025900  | 0.57893600  | 0.03749600  |
| 1 | 2.97665800  | 2.03565000  | 0.38889600  |
| 6 | 3.87956400  | -1.62583600 | -0.73877700 |
| 1 | 2.02014500  | -1.44540500 | -1.71124500 |
| 6 | 4.84211400  | -0.75830400 | -0.38359900 |
| 1 | 5.27497000  | 1.25361000  | 0.34386600  |
| 1 | 4.11874100  | -2.63855600 | -1.05297500 |
| 1 | 5.88964500  | -1.04178200 | -0.40364000 |
| 6 | 1.62672400  | -2.17861700 | 0.26883600  |
| 1 | -4.13434200 | 0.64947900  | -2.79458900 |
| 1 | -5.47338700 | -0.46474300 | -0.97888000 |
| 1 | 2.02671000  | -2.02833100 | 1.27699400  |
| 1 | 1.79951800  | -3.22715400 | 0.00820100  |
